# Supplementary material for: A Rh(iii)-catalyzed C–H activation/regiospecific annulation cascade of benzoic acids with propargyl acetates to unusual 3-alkylidene-isochromanones
Source: Royal Society of Chemistry journal article supplement (doi:10.1039/d1qo00387a), 2021-01-01
Supplement: d1qo00387a1.pdf [file d1qo00387a1.pdf]

*Electronic supplementary information*

## **Rh(III)-Catalyzed C-H Activation/Regiospecific Annulation Cascade of Benzoic acids with Propargyl Acetates to Unusual 3-Alkylidene-Isochromanones**

Jiyuan Li, <sup>a, b</sup> Feifei Fang, <sup>b</sup> Run Wang, <sup>b</sup> Yuan Li, <sup>b</sup> Bin Xu, <sup>a</sup> Hong Liu <sup>\*b, c, d</sup> and  
Yu Zhou <sup>\*b, c, d</sup>

<sup>a</sup>Department of Chemistry, Shanghai University, Shanghai 200444, China

<sup>b</sup>State Key Laboratory of Drug Research, Shanghai Institute of Materia Medica,  
Chinese Academy of Sciences, Shanghai 201203, China

<sup>c</sup>University of Chinese Academy of Sciences, Beijing 100049, China

<sup>d</sup>School of Pharmaceutical Science and Technology, Hangzhou Institute for Advanced  
Study, University of Chinese Academy of Sciences, Hangzhou 310024, China

\*E-mail: [hliu@simm.ac.cn](mailto:hliu@simm.ac.cn) (Hong Liu); [zhouyu@simm.ac.cn](mailto:zhouyu@simm.ac.cn) (Yu Zhou)

## Table of Contents

|                                                                |    |
|----------------------------------------------------------------|----|
| 1. General information .....                                   | 3  |
| 2. General procedures.....                                     | 3  |
| 3. Substrate scope of propargyl acetates .....                 | 4  |
| 4. Synthetic transformation .....                              | 6  |
| 5. Mechanistic investigations .....                            | 7  |
| 6. Characterization of compounds.....                          | 10 |
| 7. NMR spectra of the products .....                           | 21 |
| 8. X-ray single crystal diffraction data of compound 3da ..... | 56 |

## 1. General information

The reagents (chemicals) were purchased from commercial sources, and used without further purification. Analytical thin layer chromatography (TLC) was HSGF 254 (0.15-0.2 mm thickness). Column chromatography was performed using silica gel FCP 300-400. All products were characterized by their NMR and MS spectra.  $^1\text{H}$  and  $^{13}\text{C}$  NMR spectra were recorded on a 400 MHz, 500 MHz or 600 MHz instrument. Chemical shifts were reported in parts per million (ppm,  $\delta$ ) downfield from tetramethylsilane (TMS). Proton coupling patterns are described as singlet (s), doublet (d), triplet (t), quartet (q), multiplet (m), doublet of doublets (dd). High-resolution mass spectra (HRMS) were measured on Micromass Ultra Q-TOF spectrometer or Thermo DFS double-focusing spectrometer.

## 2. General procedures

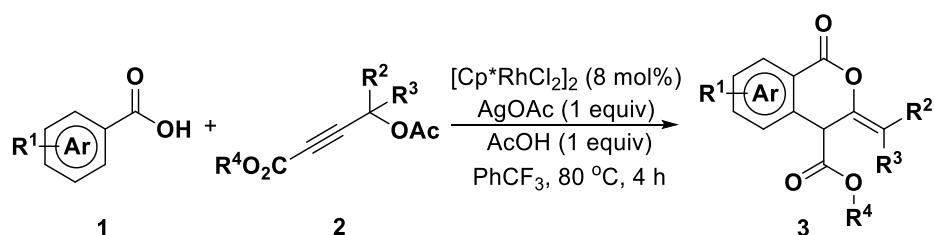

To a 25 mL of Schlenk tube were sequentially added benzoic acid **1** (0.2 mmol), 4-acetoxy-2-alkynoates **2** (0.3 mmol), [Cp\*RhCl<sub>2</sub>]<sub>2</sub> (8.0 mol%), AgOAc (1.0 equiv), AcOH (1.0 equiv) and 2 mL triflorotoluene (PhCF<sub>3</sub>). The mixture was sealed under argon and stirred at 80 °C for 4 h. After the reaction was completed, dichloromethane (DCM) 10 mL was added and the mixture was filtered through a pad of Celite which was subsequently washed with DCM. The combined organic phase was concentrated under reduced pressure, and the residue was purified by a silica gel column chromatography (PE/EA = 5:1) to afford the desired product **3**.

### 3. Substrate scope of propargyl acetates

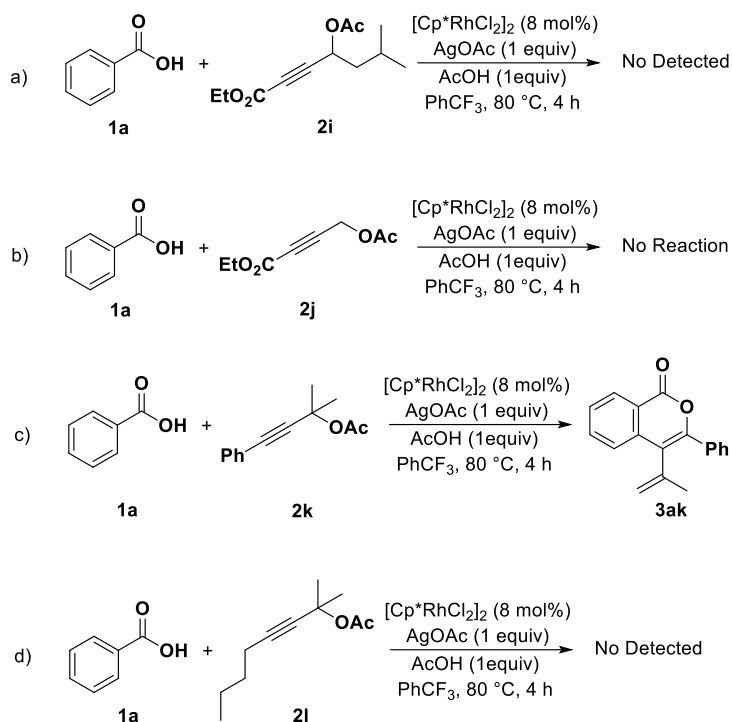

Scheme S1. Substrate scope of propargyl acetates.

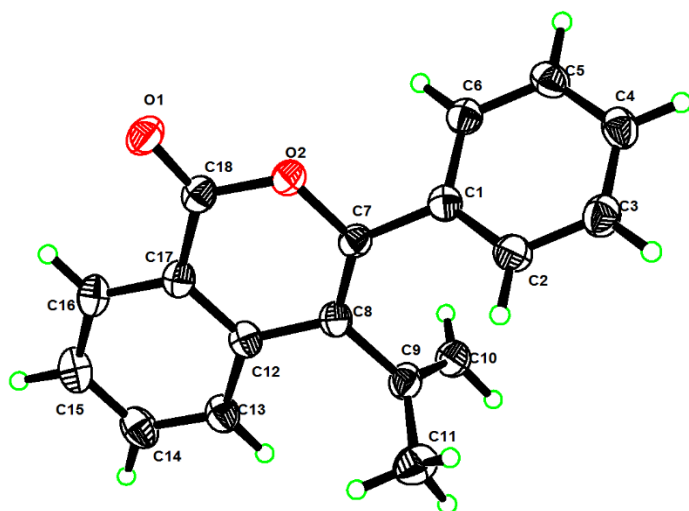

Figure S1. X-ray crystallography of compound **3ak**.

To a 25 mL of Schlenk tube were sequentially added benzoic acid **1** (0.2 mmol), ethyl 4-acetoxy-6-methylhept-2-ynoate **2i** (0.3 mmol),  $[\text{Cp}^*\text{RhCl}_2]_2$  (8.0 mol%), AgOAc (1.0 equiv), AcOH (1.0 equiv) and 2 mL trifluorotoluene ( $\text{PhCF}_3$ ). The mixture was sealed under argon and stirred at 80 °C for 4 h. After the reaction was completed, there was no obvious major product could be detected by TLC and LC-MS analysis (Scheme S1a).

To a 25 mL of Schlenk tube were sequentially added benzoic acid **1** (0.2 mmol), ethyl

4-acetoxybut-2-ynoate **2j** (0.3 mmol), [Cp\*RhCl<sub>2</sub>]<sub>2</sub> (8.0 mol%), AgOAc (1.0 equiv), AcOH (1.0 equiv) and 2 mL triflorotoluene (PhCF<sub>3</sub>). The mixture was sealed under argon and stirred at 80 °C for 4 h. After the reaction was completed, no reaction took place and the substrates remained intact (Scheme S1b).

To a 25 mL of Schlenk tube were sequentially added benzoic acid **1** (0.2 mmol), 2-methyl-4-phenylbut-3-yn-2-yl acetate **2k** (0.3 mmol), [Cp\*RhCl<sub>2</sub>]<sub>2</sub> (8.0 mol%), AgOAc (1.0 equiv), AcOH (1.0 equiv) and 2 mL triflorotoluene (PhCF<sub>3</sub>). The mixture was sealed under argon and stirred at 80 °C for 4 h. After the reaction was completed, 10 mL DCM was added and the mixture was filtered through a pad of Celite which was subsequently washed with DCM. The combined organic phase was concentrated under reduced pressure, and the residue was purified by a silica gel column chromatography (PE/EA = 10:1) to afford the **3ak** with 19% yield (10.3 mg, Scheme S1c). The structure was confirmed by X-ray crystallography (Figure S1).

To a 25 mL of Schlenk tube were sequentially added benzoic acid **1** (0.2 mmol), 2-methyl-4-phenylbut-3-yn-2-yl acetate **2k** (0.3 mmol), [Cp\*RhCl<sub>2</sub>]<sub>2</sub> (8.0 mol%), AgOAc (1.0 equiv), AcOH (1.0 equiv) and 2 mL triflorotoluene (PhCF<sub>3</sub>). The mixture was sealed under argon and stirred at 80 °C for 4 h. After the reaction was completed, we did not detected a major product and the substrates were remained (Figure S1).

## 4. Synthetic transformation

### Ethyl 3-isopropyl-1-oxoisochromane-4-carboxylate (**4**)

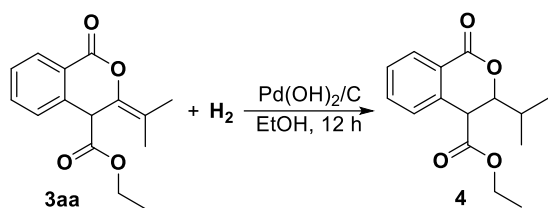

To a solution of **3aa** (100.0 mg, 0.38 mmol) in methanol (10 mL) was added Palladium hydroxide (20% on carbon). This system was evacuated and refilled with hydrogen then stirred at room temperature overnight. After the reaction was completed, dichloromethane (DCM) 10 mL was added and the mixture was filtered through a pad of Celite which was subsequently washed with DCM. The solvent was removed under vacuum and the resulting residue was purified by a silica gel column chromatography with 20% EtOAc in PE as the solvent to afford **4** in 93% yield (92.7 mg).

## 5. Mechanistic investigations

### 5.1 H/D Exchange Experiment

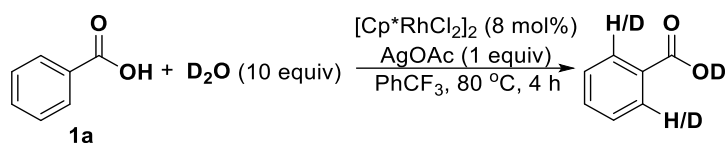

A mixture of **1a** (0.2 mmol),  $[\text{Cp}^*\text{RhCl}_2]_2$  (8 mol%), AgOAc (1.0 equiv), AcOH (1.0 equiv) and  $\text{D}_2\text{O}$  (10.0 equiv) was added into a 25 mL of Schlenk tube. The mixture was sealed under argon and stirred at 80 °C for 4 h. Afterward, the mixture was diluted with DCM and filtered through a pad of Celite, which was washed with DCM. The combined organic phase was concentrated in vacuo to yield the crude product which was further purified by silica gel column chromatography eluting with PE/EA = 50:1 to afford the deuterium product as a colorless oil. H/D exchange occurred at the C2-position of benzoic acid (39% D).

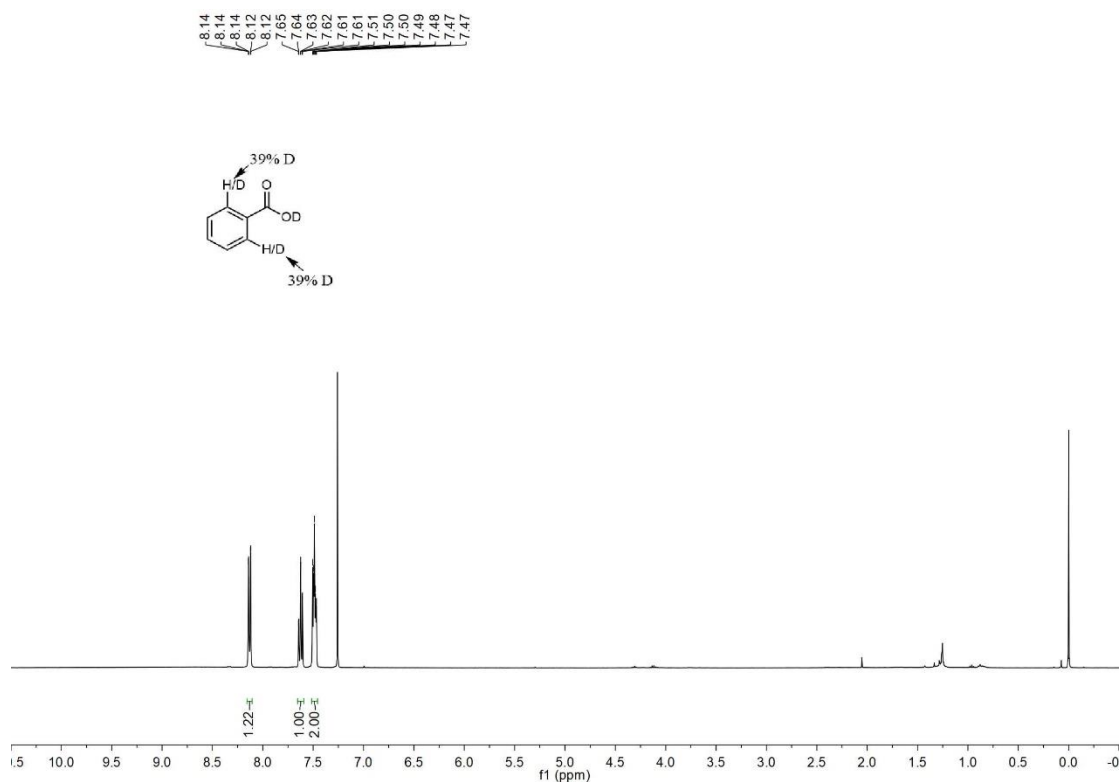

## 5.2 KIE Experiment

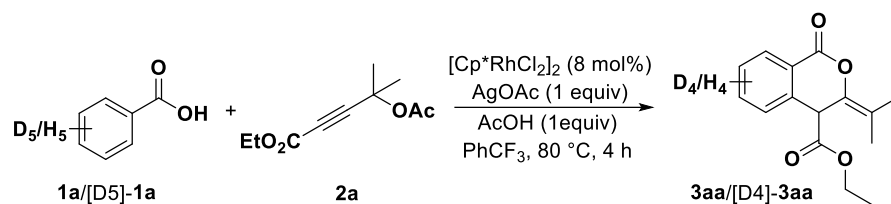

Compounds **1a** (0.2 mmol) and [D<sub>5</sub>]-**1a** (0.2 mmol) were added to a mixture of [Cp\*RhCl<sub>2</sub>]<sub>2</sub> (8 mol%), AgOAc (1.0 equiv), AcOH (1 equiv) and **2a** (0.2 mmol) in PhCF<sub>3</sub> (4.0 mL). The resulting mixture was stirred at 80 °C for 1 h. Then the reaction was stopped and filtered through a pad of Celite which was subsequently washed with DCM and the combined organic phase was concentrated under reduced pressure. The mixture of **3aa** and [D<sub>4</sub>]-**3aa** was isolated by silica gel column chromatography eluting with PE/EA from 30:1 to 20:1. The KIE value was determined by <sup>1</sup>H NMR.

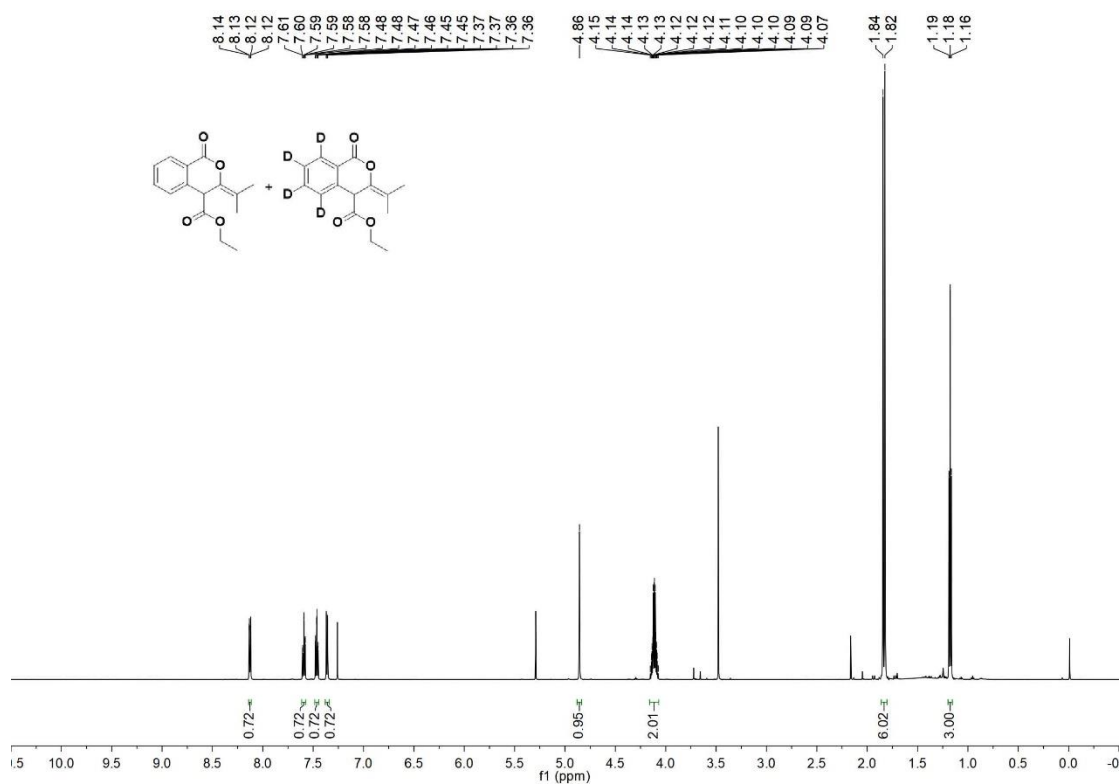



### 5.3 Competition Experiment

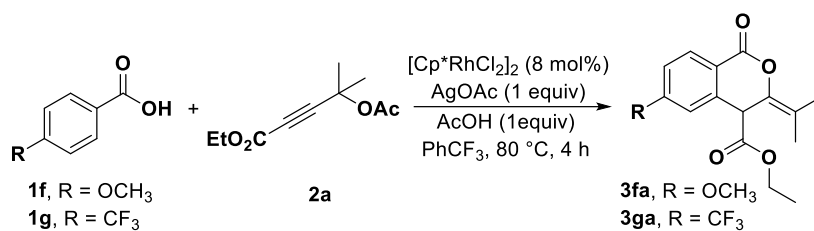

To a 25 mL of Schlenk tube were added **1f** (0.2 mmol), **1g** (0.2 mmol), **2a** (0.2 mmol), [Cp\*RhCl<sub>2</sub>]<sub>2</sub> (8.0 mol%), AgOAc (1.0 equiv), AcOH (1.0 equiv) and 4.0 mL triflorotoluene (PhCF<sub>3</sub>). The mixture was sealed under argon and stirred at 80 °C for 1 h. After the reaction was completed, dichloromethane (DCM) 10 mL was added and the mixture was filtered through a pad of Celite which was subsequently washed with DCM. The combined organic phase was concentrated under reduced pressure, and the residue was purified by a silica gel column chromatography (PE/EA = 5:1) to afford the desired product **3fa** (32.3 mg, 56%) and **3ga** (25.5 mg, 39%), **1fa/1ga** = 1.44.

## 6. Characterization of compounds

### **Ethyl 1-oxo-3-(propan-2-ylidene)isochromane-4-carboxylate (3aa)**

Light yellow oil (91% yield);  $^1\text{H}$  NMR (500 MHz, Chloroform-*d*)  $\delta$  8.13 (dd,  $J = 7.7$ , 1.4 Hz, 1H), 7.60 (td,  $J = 7.6$ , 1.4 Hz, 1H), 7.47 (td,  $J = 7.6$ , 1.2 Hz, 1H), 7.38 (dd,  $J = 7.8$ , 1.2 Hz, 1H), 4.87 (s, 1H), 4.17 – 4.07 (m, 2H), 1.84 (d,  $J = 8.1$  Hz, 6H), 1.19 (t,  $J = 7.1$  Hz, 3H);  $^{13}\text{C}$  NMR (126 MHz, Chloroform-*d*)  $\delta$  168.9, 162.4, 136.8, 135.8, 134.1, 130.3, 128.7, 127.4, 124.4, 117.5, 62.0, 45.0, 18.4, 17.2, 13.9; HRMS (ESI)  $m/z$ : calcd. for  $\text{C}_{15}\text{H}_{17}\text{O}_4^+$  [ $\text{M} + \text{H}$ ] $^+$ : 261.1121, found: 261.1118

### **Ethyl 6-fluoro-1-oxo-3-(propan-2-ylidene)isochromane-4-carboxylate (3ba)**

Light yellow oil (93% yield);  $^1\text{H}$  NMR (400 MHz, Chloroform-*d*)  $\delta$  8.16 (dd,  $J = 8.7$ , 5.6 Hz, 1H), 7.16 (td,  $J = 8.5$ , 2.5 Hz, 1H), 7.08 (dd,  $J = 8.4$ , 2.5 Hz, 1H), 4.84 (s, 1H), 4.14 (qd,  $J = 7.2$ , 1.9 Hz, 2H), 1.84 (d,  $J = 9.9$  Hz, 6H), 1.21 (t,  $J = 7.1$  Hz, 3H);  $^{13}\text{C}$  NMR (126 MHz, Chloroform-*d*)  $\delta$  168.4, 165.9 (d,  $J = 257.1$  Hz), 161.4, 138.6 (d,  $J = 9.2$  Hz), 136.4, 133.3 (d,  $J = 9.7$  Hz), 120.8 (d,  $J = 3.0$  Hz), 118.2, 116.4 (d,  $J = 22.0$  Hz), 114.4 (d,  $J = 22.8$  Hz), 62.3, 45.0, 18.4, 17.2, 13.9; HRMS (ESI)  $m/z$ : calcd. for  $\text{C}_{15}\text{H}_{14}\text{FO}_4^-$  [ $\text{M} - \text{H}$ ] $^-$ : 277.0882, found: 277.0882

### **Ethyl 6-chloro-1-oxo-3-(propan-2-ylidene)isochromane-4-carboxylate (3ca)**

White solid (86% yield);  $^1\text{H}$  NMR (400 MHz, Chloroform-*d*)  $\delta$  8.07 (d,  $J = 8.3$  Hz, 1H), 7.45 (dd,  $J = 8.4$ , 2.0 Hz, 1H), 7.38 (d,  $J = 2.0$  Hz, 1H), 4.82 (s, 1H), 4.14 (qq,  $J = 7.0$ , 3.7 Hz, 2H), 1.84 (d,  $J = 8.6$  Hz, 6H), 1.21 (t,  $J = 7.1$  Hz, 3H).  $^{13}\text{C}$  NMR (126 MHz, Chloroform-*d*)  $\delta$  167.9, 161.1, 140.0, 136.9, 135.9, 131.3, 128.8, 127.1, 122.5, 117.9, 61.8, 44.3, 18.0, 16.8, 13.5; HRMS (ESI)  $m/z$ : calcd. for  $\text{C}_{15}\text{H}_{16}\text{ClO}_4^+$  [ $\text{M} + \text{H}$ ] $^+$ , 295.0732; found, 295.0725.

### **Ethyl 6-bromo-1-oxo-3-(propan-2-ylidene)isochromane-4-carboxylate (3da)**

White solid (87% yield);  $^1\text{H}$  NMR (400 MHz, Chloroform-*d*)  $\delta$  7.99 (d,  $J = 8.3$  Hz, 1H), 7.61 (dd,  $J = 8.3$ , 1.9 Hz, 1H), 7.54 (d,  $J = 1.9$  Hz, 1H), 4.81 (s, 1H), 4.19 – 4.09 (m,

2H), 1.83 (d,  $J = 8.5$  Hz, 6H), 1.20 (t,  $J = 7.1$  Hz, 3H);  $^{13}\text{C}$  NMR (126 MHz, Chloroform-*d*)  $\delta$  167.9, 161.3, 137.0, 135.9, 131.8, 131.3, 130.0, 128.6, 122.9, 117.9, 61.8, 44.2, 18.0, 16.8, 13.5; HRMS (ESI)  $m/z$ : calcd. for  $\text{C}_{15}\text{H}_{16}\text{BrO}_4^+ [\text{M} + \text{H}]^+$ , 339.0226; found, 339.0217.

**Ethyl 6-methyl-1-oxo-3-(propan-2-ylidene)isochromane-4-carboxylate (3ea)**

Light yellow oil (78% yield);  $^1\text{H}$  NMR (400 MHz, Chloroform-*d*)  $\delta$  8.02 (d,  $J = 7.9$  Hz, 1H), 7.31 – 7.24 (m, 1H), 7.17 (s, 1H), 4.81 (s, 1H), 4.17 – 4.07 (m, 2H), 2.43 (s, 3H), 1.83 (d,  $J = 8.4$  Hz, 6H), 1.19 (t,  $J = 7.1$  Hz, 3H);  $^{13}\text{C}$  NMR (126 MHz, Chloroform-*d*)  $\delta$  169.0, 162.5, 145.2, 137.0, 135.7, 130.3, 129.7, 127.9, 121.8, 117.3, 62.0, 45.0, 21.8, 18.4, 17.2, 14.0; HRMS (EI)  $m/z$ : calcd. for  $\text{C}_{16}\text{H}_{18}\text{O}_4^+ [\text{M}]^+$ , 274.1200; found, 274.1197.

**Ethyl 6-methoxy-1-oxo-3-(propan-2-ylidene)isochromane-4-carboxylate (3fa)**

Light yellow oil (84% yield);  $^1\text{H}$  NMR (400 MHz, Chloroform-*d*)  $\delta$  8.07 (d,  $J = 8.7$  Hz, 1H), 6.96 (dd,  $J = 8.7, 2.5$  Hz, 1H), 6.83 (d,  $J = 2.5$  Hz, 1H), 4.81 (s, 1H), 4.17 – 4.08 (m, 2H), 3.88 (s, 3H), 1.83 (d,  $J = 9.4$  Hz, 6H), 1.20 (t,  $J = 7.1$  Hz, 3H);  $^{13}\text{C}$  NMR (126 MHz, Chloroform-*d*)  $\delta$  168.4, 163.6, 161.8, 137.4, 136.4, 132.1, 116.9, 116.4, 114.3, 111.6, 61.5, 55.2, 44.9, 17.9, 16.8, 13.5; HRMS (ESI)  $m/z$ : calcd. for  $\text{C}_{16}\text{H}_{19}\text{O}_5^+ [\text{M} + \text{H}]^+$ , 291.1227; found, 291.1222.

**Ethyl 1-oxo-3-(propan-2-ylidene)-6-(trifluoromethyl)isochromane-4-carboxylate (3ga)**

White solid (76% yield);  $^1\text{H}$  NMR (400 MHz, Chloroform-*d*)  $\delta$  8.27 (d,  $J = 8.1$  Hz, 1H), 7.74 (dd,  $J = 8.1, 1.7$  Hz, 1H), 7.65 (d,  $J = 1.8$  Hz, 1H), 4.94 (s, 1H), 4.25 – 4.07 (m, 2H), 1.86 (d,  $J = 3.9$  Hz, 6H), 1.21 (t,  $J = 7.1$  Hz, 3H);  $^{13}\text{C}$  NMR (126 MHz, Chloroform-*d*)  $\delta$  168.2, 161.1, 136.6, 136.1, 135.5 (q,  $J = 33.1$  Hz), 131.0, 127.6, 125.6 (q,  $J = 3.8$  Hz), 124.5 (q,  $J = 3.6$  Hz), 123.2 (q,  $J = 273.1$  Hz), 118.8, 62.4, 44.9, 18.4, 17.2, 13.9; HRMS (ESI)  $m/z$ : calcd. for  $\text{C}_{16}\text{H}_{16}\text{F}_3\text{O}_4^+ [\text{M} + \text{H}]^+$ , 329.0995; found, 329.0987.

**Ethyl 6-nitro-1-oxo-3-(propan-2-ylidene)isochromane-4-carboxylate (3ha)**

Light yellow solid (53% yield); <sup>1</sup>H NMR (500 MHz, Chloroform-*d*) δ 8.35 – 8.28 (m, 2H), 8.24 (d, *J* = 2.0 Hz, 1H), 4.98 (s, 1H), 4.21 – 4.13 (m, 2H), 1.87 (d, *J* = 3.2 Hz, 6H), 1.22 (t, *J* = 7.1 Hz, 3H); <sup>13</sup>C NMR (126 MHz, Chloroform-*d*) δ 167.4, 160.0, 150.3, 137.1, 135.3, 131.4, 129.2, 123.0, 122.2, 119.0, 62.2, 44.4, 18.1, 16.9, 13.5; HRMS (ESI) *m/z*: calcd. for C<sub>15</sub>H<sub>14</sub>NO<sub>6</sub><sup>-</sup> [M - H]<sup>-</sup>, 304.0827; found, 304.0824.

**Ethyl 8-fluoro-1-oxo-3-(propan-2-ylidene)isochromane-4-carboxylate (3ia)**

White solid (61% yield); <sup>1</sup>H NMR (400 MHz, Chloroform-*d*) δ 7.60 – 7.53 (m, 1H), 7.21 – 7.14 (m, 2H), 4.86 (s, 1H), 4.21 – 4.07 (m, 2H), 1.84 (d, *J* = 2.5 Hz, 6H), 1.20 (t, *J* = 7.1 Hz, 3H); <sup>13</sup>C NMR (126 MHz, Chloroform-*d*) δ 168.4, 162.7 (d, *J* = 266.3 Hz), 158.0 (d, *J* = 4.4 Hz), 138.2, 136.2, 135.3 (d, *J* = 9.8 Hz), 123.1 (d, *J* = 4.2 Hz), 117.7, 117.1 (d, *J* = 21.6 Hz), 113.4 (d, *J* = 7.9 Hz), 62.3, 45.2, 18.4, 17.2, 13.9; HRMS (ESI) *m/z*: calcd. for C<sub>15</sub>H<sub>15</sub>FNaO<sub>4</sub><sup>+</sup> [M + Na]<sup>+</sup>, 301.0847; found, 301.0846.

**Ethyl 8-methyl-1-oxo-3-(propan-2-ylidene)isochromane-4-carboxylate (3ja)**

White solid (59% yield); <sup>1</sup>H NMR (400 MHz, Chloroform-*d*) δ 7.43 (t, *J* = 7.6 Hz, 1H), 7.28 (d, *J* = 8.0 Hz, 1H), 7.18 (d, *J* = 7.5 Hz, 1H), 4.81 (s, 1H), 4.20 – 4.06 (m, 2H), 2.71 (s, 3H), 1.82 (d, *J* = 1.6 Hz, 6H), 1.20 (t, *J* = 7.1 Hz, 3H); <sup>13</sup>C NMR (126 MHz, Chloroform-*d*) δ 169.1, 161.9, 143.0, 136.7, 136.7, 132.9, 132.1, 125.2, 123.2, 116.0, 62.0, 45.9, 22.1, 18.4, 17.1, 14.0; HRMS (ESI) *m/z*: calcd. for C<sub>16</sub>H<sub>19</sub>O<sub>4</sub><sup>+</sup> [M + H]<sup>+</sup>, 275.1278; found, 275.1271.

**Ethyl 7-fluoro-1-oxo-3-(propan-2-ylidene)isochromane-4-carboxylate (3ka)**

Light yellow oil (35% yield); <sup>1</sup>H NMR (400 MHz, Chloroform-*d*) δ 7.82 (dd, *J* = 8.4, 2.7 Hz, 1H), 7.40 – 7.28 (m, 2H), 4.85 (s, 1H), 4.20 – 4.08 (m, 2H), 1.84 (d, *J* = 7.3 Hz, 6H), 1.19 (t, *J* = 7.1 Hz, 3H); <sup>13</sup>C NMR (126 MHz, Chloroform-*d*) δ 168.7, 162.4 (d, *J* = 249.3 Hz), 161.3 (d, *J* = 2.7 Hz), 136.6, 131.7 (d, *J* = 3.3 Hz), 129.4 (d, *J* = 7.6 Hz), 126.3 (d, *J* = 7.8 Hz), 121.5 (d, *J* = 22.2 Hz), 118.1, 116.7 (d, *J* = 23.5 Hz), 62.1, 44.3, 18.4, 17.2, 13.9; HRMS (ESI) *m/z*: calcd. for C<sub>15</sub>H<sub>15</sub>FO<sub>4</sub><sup>+</sup> [M + H]<sup>+</sup>, 279.1035; found,

279.1039.

**Ethyl 7-methoxy-1-oxo-3-(propan-2-ylidene)isochromane-4-carboxylate (3la)**

Yellow oil (70% yield); <sup>1</sup>H NMR (400 MHz, Chloroform-*d*) δ 7.61 (d, *J* = 2.7 Hz, 1H), 7.28 (d, *J* = 8.5 Hz, 1H), 7.15 (dd, *J* = 8.5, 2.8 Hz, 1H), 4.82 (s, 1H), 4.17 – 4.07 (m, 2H), 3.86 (d, *J* = 1.0 Hz, 3H), 1.84 (d, *J* = 8.0 Hz, 6H), 1.19 (t, *J* = 7.2 Hz, 3H); <sup>13</sup>C NMR (126 MHz, Chloroform-*d*) δ 169.2, 162.4, 159.7, 137.1, 128.6, 128.1, 125.3, 121.9, 117.3, 112.9, 61.9, 55.7, 44.2, 18.4, 17.2, 14.0; HRMS (ESI) *m/z*: calcd. for C<sub>16</sub>H<sub>19</sub>O<sub>5</sub><sup>+</sup> [M + H]<sup>+</sup>, 291.1227; found, 291.1225.

**Ethyl 7-methyl-6-nitro-1-oxo-3-(propan-2-ylidene)isochromane-4-carboxylate (3ma)**

White solid (59% yield); <sup>1</sup>H NMR (400 MHz, Chloroform-*d*) δ 8.14 (s, 1H), 7.93 (s, 1H), 4.91 (s, 1H), 4.21 – 4.09 (m, 2H), 2.64 (s, 3H), 1.85 (d, *J* = 4.9 Hz, 6H), 1.22 (t, *J* = 7.1 Hz, 3H); <sup>13</sup>C NMR (126 MHz, Chloroform-*d*) δ 168.1, 160.6, 152.1, 136.0, 134.8, 134.7, 133.8, 127.8, 123.5, 119.2, 62.5, 44.3, 19.8, 18.5, 17.3, 14.0; HRMS (ESI) *m/z*: calcd. for C<sub>16</sub>H<sub>16</sub>NO<sub>6</sub><sup>-</sup> [M – H]<sup>-</sup>, 318.0983; found, 318.0979.

**Ethyl 5-methyl-1-oxo-3-(propan-2-ylidene)-1,3,4,5-tetrahydropyrano[4,3-*b*]indole-4-carboxylate (3na)**

Yellow oil (28% yield); <sup>1</sup>H NMR (500 MHz, Chloroform-*d*) δ 8.18 – 8.14 (m, 1H), 7.41 – 7.38 (m, 1H), 7.38 – 7.31 (m, 2H), 5.00 (s, 1H), 4.22 – 4.15 (m, 2H), 3.83 (s, 3H), 1.93 (s, 3H), 1.87 (s, 3H), 1.23 (t, *J* = 7.1 Hz, 3H); <sup>13</sup>C NMR (126 MHz, Chloroform-*d*) δ 167.3, 160.1, 141., 138.0, 136.7, 125.0, 123.8, 122.8, 121.2, 118.7, 109.8, 101.9, 62.5, 40.5, 30.5, 18.6, 17.7, 14.0; HRMS (ESI) *m/z*: calcd. for C<sub>18</sub>H<sub>20</sub>NO<sub>4</sub><sup>+</sup> [M + H]<sup>+</sup>, 314.1387; found, 314.1386.

**Ethyl 7-oxo-5-(propan-2-ylidene)-4,7-dihydro-5H-furo[2,3-*c*]pyran-4-carboxylate (3oa)**

Light yellow oil (41% yield);  $^1\text{H}$  NMR (400 MHz, Chloroform-*d*)  $\delta$  7.67 (d,  $J = 1.8$  Hz, 1H), 6.58 (d,  $J = 1.8$  Hz, 1H), 4.85 (s, 1H), 4.23 – 4.13 (m, 2H), 1.88 (s, 3H), 1.79 (s, 3H), 1.23 (d,  $J = 7.1$  Hz, 3H);  $^{13}\text{C}$  NMR (126 MHz, Chloroform-*d*)  $\delta$  168.1, 153.6, 148.7, 139.1, 137.5, 130.6, 120.0, 110.4, 62.2, 41.2, 18.5, 17.6, 14.0; HRMS (ESI)  $m/z$ : calcd. for  $\text{C}_{13}\text{H}_{15}\text{O}_5^+$  [ $\text{M} + \text{H}$ ] $^+$ , 251.0914; found, 251.0907.

**Ethyl 1-oxo-3-(propan-2-ylidene)-3,4-dihydro-1H-benzo[*g*]isochromene-4-carboxylate (3pa)**

White solid (77% yield);  $^1\text{H}$  NMR (400 MHz, Chloroform-*d*)  $\delta$  8.76 (s, 1H), 8.01 (d,  $J = 8.1$  Hz, 1H), 7.93 – 7.86 (m, 1H), 7.83 (s, 1H), 7.66 (ddd,  $J = 8.3, 6.8, 1.4$  Hz, 1H), 7.59 (ddd,  $J = 8.1, 6.8, 1.3$  Hz, 1H), 5.07 (s, 1H), 4.20 – 4.09 (m, 2H), 1.90 (s, 6H), 1.20 (t,  $J = 7.1$  Hz, 3H);  $^{13}\text{C}$  NMR (126 MHz, Chloroform-*d*)  $\delta$  169.2, 162.8, 137.2, 135.7, 132.6, 132.4, 130.7, 129.6, 129.2, 127.6, 127.1, 126.2, 122.0, 117.5, 62.0, 45.3, 18.5, 17.3, 14.0; HRMS (ESI)  $m/z$ : calcd. for  $\text{C}_{19}\text{H}_{19}\text{O}_4^+$  [ $\text{M} + \text{H}$ ] $^+$ , 311.1278; found, 311.1280.

**Ethyl 7-oxo-9-(propan-2-ylidene)-9,10-dihydro-7H-phenaleno[1,9-*fg*]isochromene-10-carboxylate (3qa)**

Yellow solid (84% yield);  $^1\text{H}$  NMR (600 MHz, Chloroform-*d*)  $\delta$  9.59 (d,  $J = 9.4$  Hz, 1H), 8.35 – 8.31 (m, 4H), 8.28 (d,  $J = 7.5$  Hz, 1H), 8.23 (d,  $J = 8.9$  Hz, 1H), 8.11 – 8.04 (m, 3H), 5.26 (s, 1H), 4.22 – 4.10 (m, 2H), 1.92 (d,  $J = 5.6$  Hz, 6H), 1.20 (t,  $J = 7.1$  Hz, 3H);  $^{13}\text{C}$  NMR (151 MHz, Chloroform-*d*)  $\delta$  168.7, 162.2, 136.1, 134.6, 133.9, 132.0, 130.6, 130.3, 129.8, 126.6, 126.6, 126.2, 126.2, 124.7, 124.3, 123.3, 122.5, 116.1, 115.8, 61.7, 46.5, 18.1, 16.8, 13.5; HRMS (ESI)  $m/z$ : calcd. for  $\text{C}_{25}\text{H}_{21}\text{O}_4^+$  [ $\text{M} + \text{H}$ ] $^+$ , 385.1434; found, 385.1431.

**Ethyl 1-oxo-3-(pentan-3-ylidene)isochromane-4-carboxylate (3ab)**

Colorless oil (87% yield);  $^1\text{H}$  NMR (400 MHz, Chloroform-*d*)  $\delta$  8.18 – 8.11 (m, 1H), 7.61 (td,  $J = 7.6, 1.5$  Hz, 1H), 7.48 (td,  $J = 7.6, 1.2$  Hz, 1H), 7.38 (ddt,  $J = 7.6, 1.2, 0.6$  Hz, 1H), 4.83 (s, 1H), 4.21 – 4.04 (m, 2H), 2.37 – 2.24 (m, 2H), 2.24 – 2.13 (m, 2H),

1.19 (t,  $J = 7.1$  Hz, 3H), 1.04 (dt,  $J = 15.9, 7.5$  Hz, 6H);  $^{13}\text{C}$  NMR (126 MHz, Chloroform-*d*)  $\delta$  168.6, 162.0, 136.4, 135.5, 133.6, 129.9, 128.5, 128.3, 126.8, 124.0, 61.6, 44.5, 22.7, 21.1, 13.4, 12.6, 12.2; HRMS (ESI)  $m/z$ : calcd. for  $\text{C}_{17}\text{H}_{21}\text{O}_4^+$  [ $\text{M} + \text{H}$ ] $^+$ , 289.1434; found, 289.1433.

### **Ethyl 3-(diphenylmethylene)-1-oxoisochromane-4-carboxylate (3ac)**

White solid (46% yield);  $^1\text{H}$  NMR (400 MHz, Chloroform-*d*)  $\delta$  8.16 (dd,  $J = 7.7, 1.4$  Hz, 1H), 7.59 (td,  $J = 7.5, 1.5$  Hz, 1H), 7.50 (td,  $J = 7.6, 1.3$  Hz, 1H), 7.42 – 7.37 (m, 3H), 7.32 – 7.28 (m, 4H), 7.27 – 7.24 (m, 4H), 4.67 (s, 1H), 4.17 (q,  $J = 7.1$  Hz, 2H), 1.23 (t,  $J = 7.1$  Hz, 3H);  $^{13}\text{C}$  NMR (126 MHz, Chloroform-*d*)  $\delta$  168.8, 161.9, 140.0, 138.5, 137.2, 135.7, 134.4, 130.4, 130.2, 130.1, 130.0, 128.9, 128.7, 128.5, 128.0, 128.0, 127.9, 127.7, 127.6, 127.5, 124.0, 122.4, 62.3, 47.1, 14.0; HRMS (ESI)  $m/z$ : calcd. for  $\text{C}_{25}\text{H}_{21}\text{O}_4^+$  [ $\text{M} + \text{H}$ ] $^+$ , 385.1434; found, 385.1434.

### **Ethyl 3-cyclopentylidene-1-oxoisochromane-4-carboxylate (3ad)**

Colorless oil (49% yield);  $^1\text{H}$  NMR (600 MHz, Chloroform-*d*)  $\delta$  8.15 (dd,  $J = 7.8, 1.4$  Hz, 1H), 7.60 (td,  $J = 7.6, 1.4$  Hz, 1H), 7.47 (td,  $J = 7.7, 1.2$  Hz, 1H), 7.37 (d,  $J = 7.6$  Hz, 1H), 4.67 (s, 1H), 4.16 – 4.10 (m, 2H), 2.60 – 2.52 (m, 1H), 2.50 – 2.41 (m, 2H), 2.38 – 2.30 (m, 1H), 1.78 – 1.70 (m, 3H), 1.69 – 1.65 (m, 1H), 1.19 (t,  $J = 7.1$  Hz, 3H);  $^{13}\text{C}$  NMR (151 MHz, Chloroform-*d*)  $\delta$  168.5, 161.9, 135.2, 133.7, 133.6, 130.0, 128.3, 128.3, 126.8, 124.1, 61.6, 46.1, 28.7, 28.5, 26.2, 25.9, 13.5; HRMS (ESI)  $m/z$ : calcd. for  $\text{C}_{17}\text{H}_{19}\text{O}_4^+$  [ $\text{M} + \text{H}$ ] $^+$ , 287.1278; found, 287.1275.

### **Ethyl 3-cyclohexylidene-1-oxoisochromane-4-carboxylate (3ae)**

Colorless oil (86% yield);  $^1\text{H}$  NMR (400 MHz, Chloroform-*d*)  $\delta$  8.14 (dd,  $J = 7.8, 1.4$  Hz, 1H), 7.61 (td,  $J = 7.6, 1.4$  Hz, 1H), 7.48 (td,  $J = 7.6, 1.2$  Hz, 1H), 7.37 (d,  $J = 7.6$  Hz, 1H), 4.90 (s, 1H), 4.13 (qd,  $J = 7.1, 1.4$  Hz, 2H), 2.61 – 2.53 (m, 1H), 2.38 – 2.24 (m, 1H), 2.24 – 2.16 (m, 1H), 1.65 – 1.52 (m, 7H), 1.20 (t,  $J = 7.1$  Hz, 3H);  $^{13}\text{C}$  NMR (126 MHz, Chloroform-*d*)  $\delta$  170.5, 164.0, 137.4, 135.7, 135.5, 131.7, 130.2, 128.9, 126.9, 126.0, 63.4, 45.9, 30.5, 29.0, 28.4, 28.3, 27.8, 15.4; HRMS (ESI)  $m/z$ : calcd. for

$C_{18}H_{21}O_4^+$   $[M + H]^+$ , 301.1434; found, 301.1433.

**Ethyl 3-cycloheptylidene-1-oxoisochromane-4-carboxylate (3af)**

Colorless oil (30% yield);  $^1H$  NMR (600 MHz, Chloroform-*d*)  $\delta$  8.14 (dd,  $J = 7.8, 1.4$  Hz, 1H), 7.60 (td,  $J = 7.6, 1.4$  Hz, 1H), 7.48 (td,  $J = 7.6, 1.2$  Hz, 1H), 7.38 (dd,  $J = 7.7, 1.1$  Hz, 1H), 4.88 (s, 1H), 4.18 – 4.08 (m, 2H), 2.66 – 2.58 (m, 1H), 2.45 – 2.30 (m, 3H), 1.72 – 1.59 (m, 4H), 1.57 – 1.43 (m, 4H), 1.20 (t,  $J = 7.1$  Hz, 3H);  $^{13}C$  NMR (151 MHz, Chloroform-*d*)  $\delta$  168.6, 162.0, 136.4, 135.4, 133.6, 129.8, 128.3, 126.9, 126.5, 124.0, 61.6, 44.4, 29.3, 28.6, 28.5, 27.9, 27.1, 26.6, 13.5; HRMS (ESI)  $m/z$ : calcd. for  $C_{19}H_{23}O_4^+$   $[M + H]^+$ , 315.1591; found, 315.1586.

**Ethyl 3-(butan-2-ylidene)-1-oxoisochromane-4-carboxylate (3ag)**

Colorless oil (71% yield);  $^1H$  NMR (500 MHz, Chloroform-*d*)  $\delta$  8.14 (dt,  $J = 7.8, 1.7$  Hz, 2H), 7.60 (tt,  $J = 7.5, 1.6$  Hz, 2H), 7.47 (td,  $J = 7.6, 1.2$  Hz, 2H), 7.37 (ddd,  $J = 7.7, 3.6, 1.2$  Hz, 2H), 4.87 (s, 1H), 4.84 (s, 1H), 4.16 – 4.09 (m, 4H), 2.35 – 2.27 (m, 2H), 2.19 (q,  $J = 7.5$  Hz, 2H), 1.83 (d,  $J = 10.9$  Hz, 6H), 1.19 (td,  $J = 7.1, 1.5$  Hz, 6H), 1.06 (t,  $J = 7.6$  Hz, 3H), 1.01 (t,  $J = 7.6$  Hz, 3H);  $^{13}C$  NMR (126 MHz, Chloroform-*d*)  $\delta$  168.5, 168.5, 162.0, 161.9, 136.3, 136.0, 135.4, 135.4, 133.6, 129.9, 129.8, 128.3, 128.3, 127.0, 126.8, 124.1, 123.9, 122.7, 122.6, 61.6, 61.5, 44.6, 44.4, 25.1, 23.4, 15.4, 14.2, 13.5, 13.5, 12.2, 11.7; HRMS (ESI)  $m/z$ : calcd. for  $C_{16}H_{19}O_4^+$   $[M + H]^+$ , 275.1278; found, 275.1278.

**Ethyl 6-fluoro-1-oxo-3-(pentan-3-ylidene)isochromane-4-carboxylate (3bb)**

Colorless oil (63% yield);  $^1H$  NMR (600 MHz, Chloroform-*d*)  $\delta$  8.15 (dd,  $J = 8.7, 5.6$  Hz, 1H), 7.15 (td,  $J = 8.5, 2.5$  Hz, 1H), 7.07 (dd,  $J = 8.3, 2.5$  Hz, 1H), 4.79 (s, 1H), 4.19 – 4.08 (m, 2H), 2.36 – 2.23 (m, 2H), 2.23 – 2.12 (m, 2H), 1.20 (t,  $J = 7.1$  Hz, 3H), 1.05 (t,  $J = 7.6$  Hz, 3H), 1.01 (t,  $J = 7.5$  Hz, 3H);  $^{13}C$  NMR (126 MHz, Chloroform-*d*)  $\delta$  168.5, 165.9 (d,  $J = 257.1$  Hz), 161.6, 138.8 (d,  $J = 9.2$  Hz), 136.4, 133.3 (d,  $J = 9.8$  Hz), 129.6, 120.9 (d,  $J = 2.9$  Hz), 116.4 (d,  $J = 22.2$  Hz), 114.4 (d,  $J = 22.7$  Hz), 62.2, 45.0, 23.1, 21.6, 13.9, 13.0, 12.6; HRMS (ESI)  $m/z$ : calcd. for  $C_{17}H_{20}FO_4^+$   $[M + H]^+$ ,



307.1340; found, 307.1348.

**Ethyl 3-cyclopentylidene-6-fluoro-1-oxoisochromane-4-carboxylate (3bd)**

Colorless oil (50% yield);  $^1\text{H}$  NMR (600 MHz, Chloroform-*d*)  $\delta$  8.17 (dd,  $J = 8.7, 5.6$  Hz, 1H), 7.15 (td,  $J = 8.5, 2.5$  Hz, 1H), 7.06 (dd,  $J = 8.3, 2.5$  Hz, 1H), 4.63 (s, 1H), 4.18 – 4.10 (m, 2H), 2.59 – 2.52 (m, 1H), 2.48 – 2.40 (m, 2H), 2.35 – 2.29 (m, 1H), 1.78 – 1.64 (m, 2H), 1.20 (t,  $J = 7.1$  Hz, 3H);  $^{13}\text{C}$  NMR (126 MHz, Chloroform-*d*)  $\delta$  168.4, 165.9 (d,  $J = 257.5$  Hz), 161.4, 138.5 (d,  $J = 9.2$  Hz), 133.7, 133.4 (d,  $J = 9.7$  Hz), 129.4, 120.9 (d,  $J = 3.0$  Hz), 116.4 (d,  $J = 22.0$  Hz), 114.3 (d,  $J = 22.9$  Hz), 62.2, 46.6, 29.2, 29.0, 26.7, 26.3, 14.0; HRMS (ESI)  $m/z$ : calcd. for  $\text{C}_{17}\text{H}_{18}\text{FO}_4^+$   $[\text{M} + \text{H}]^+$ , 305.1184; found, 305.1180.

**Ethyl 3-cyclohexylidene-6-fluoro-1-oxoisochromane-4-carboxylate (3be)**

Colorless oil (63% yield);  $^1\text{H}$  NMR (500 MHz, Chloroform-*d*)  $\delta$  8.16 (dd,  $J = 8.7, 5.6$  Hz, 1H), 7.16 (td,  $J = 8.5, 2.5$  Hz, 1H), 7.07 (dd,  $J = 8.4, 2.5$  Hz, 1H), 4.88 (s, 1H), 4.19 – 4.10 (m, 2H), 2.61 – 2.54 (m, 1H), 2.36 – 2.24 (m, 2H), 2.23 – 2.16 (m, 1H), 1.66 – 1.53 (m, 6H), 1.21 (t,  $J = 7.1$  Hz, 3H);  $^{13}\text{C}$  NMR (126 MHz, Chloroform-*d*)  $\delta$  168.0, 165.4 (d,  $J = 257.1$  Hz), 161.2, 138.3 (d,  $J = 9.2$  Hz), 133.3, 132.7 (d,  $J = 9.8$  Hz), 125.6, 120.4 (d,  $J = 2.9$  Hz), 115.9 (d,  $J = 22.1$  Hz), 114.1 (d,  $J = 22.7$  Hz), 61.8, 44.0, 28.6, 27.1, 26.5, 26.4, 25.9, 13.5; HRMS (ESI)  $m/z$ : calcd. for  $\text{C}_{18}\text{H}_{20}\text{FO}_4^+$   $[\text{M} + \text{H}]^+$ , 319.1340; found, 319.1338.

**Ethyl 3-(butan-2-ylidene)-6-fluoro-1-oxoisochromane-4-carboxylate (3bg)**

Colorless oil (67% yield);  $^1\text{H}$  NMR (600 MHz, Chloroform-*d*)  $\delta$  8.15 (ddd,  $J = 8.6, 5.6, 2.0$  Hz, 2H), 7.15 (td,  $J = 8.5, 2.5$  Hz, 2H), 7.06 (ddd,  $J = 8.3, 4.5, 2.5$  Hz, 2H), 4.83 (s, 1H), 4.79 (s, 1H), 4.17 – 4.10 (m, 4H), 2.35 – 2.24 (m, 2H), 2.17 (q,  $J = 7.6$  Hz, 2H), 1.83 (s, 3H), 1.80 (s, 3H), 1.19 (td,  $J = 7.1, 1.7$  Hz, 6H), 1.05 (t,  $J = 7.5$  Hz, 3H), 1.00 (t,  $J = 7.6$  Hz, 3H);  $^{13}\text{C}$  NMR (126 MHz, Chloroform-*d*)  $\delta$  168.4, 168.4, 165.9 (dd,  $J = 257.2, 2.1$  Hz), 161.5, 161.4, 138.7 (dd,  $J = 9.3, 6.7$  Hz), 136.4, 136.0, 133.3 (dd,  $J = 9.7, 3.6$  Hz), 123.8, 123.7, 121.0 (d,  $J = 2.9$  Hz), 120.8 (d,  $J = 2.9$  Hz), 116.4 (d,  $J =$

22.2 Hz), 114.4 (dd,  $J = 22.8, 19.8$  Hz), 62.3, 62.2, 45.1, 44.9, 25.6, 23.9, 15.9, 14.6, 13.9, 13.9, 12.6, 12.1; HRMS (ESI)  $m/z$ : calcd. for  $C_{16}H_{18}FO_4^+$   $[M + H]^+$ , 293.1184; found, 293.1188.

**Ethyl 10-oxo-8-(pentan-3-ylidene)-5,7,8,10-tetrahydro-1H-phenaleno[1,9-gh]isochromene-7-carboxylate (3qb)**

Yellow solid (64% yield);  $^1H$  NMR (500 MHz, Chloroform-*d*)  $\delta$  9.60 (d,  $J = 9.4$  Hz, 1H), 8.32 (dd,  $J = 8.5, 4.5$  Hz, 2H), 8.28 (d,  $J = 7.5$  Hz, 1H), 8.22 (d,  $J = 8.8$  Hz, 1H), 8.12 – 8.03 (m, 3H), 5.23 (s, 1H), 4.24 – 4.09 (m, 2H), 2.44 – 2.33 (m, 2H), 2.33 – 2.24 (m, 2H), 1.20 (t,  $J = 7.1$  Hz, 3H), 1.11 (t,  $J = 7.5$  Hz, 3H), 1.05 (t,  $J = 7.5$  Hz, 3H);  $^{13}C$  NMR (126 MHz, Chloroform-*d*)  $\delta$  169.3, 162.7, 136.7, 135.1, 134.6, 132.5, 131.0, 130.8, 130.3, 127.6, 127.0, 127.0, 126.7, 125.1, 124.8, 123.8, 122.9, 116.6, 62.1, 46.9, 23.2, 21.5, 14.0, 13.4, 12.7; HRMS (ESI)  $m/z$ : calcd. for  $C_{27}H_{25}O_4^+$   $[M + H]^+$ , 413.1747; found, 413.1741.

**Ethyl 8-cyclopentylidene-10-oxo-7,10-dihydro-8H-phenaleno[1,9-gh]isochromene-7-carboxylate (3qd)**

Yellow solid (45% yield);  $^1H$  NMR (500 MHz, Chloroform-*d*)  $\delta$  9.60 (d,  $J = 9.5$  Hz, 1H), 8.35 – 8.29 (m, 2H), 8.28 (d,  $J = 7.6$  Hz, 1H), 8.22 (d,  $J = 8.9$  Hz, 1H), 8.12 – 8.02 (m, 3H), 5.06 (s, 1H), 4.23 – 4.08 (m, 2H), 2.69 – 2.56 (m, 2H), 2.53 – 2.40 (m, 2H), 1.83 – 1.65 (m, 4H), 1.19 (t,  $J = 7.1$  Hz, 3H);  $^{13}C$  NMR (126 MHz, Chloroform-*d*)  $\delta$  169.2, 162.5, 135.1, 134.3, 134.0, 132.5, 131.0, 130.8, 130.7, 130.3, 127.3, 127.0, 127.0, 126.7, 125.2, 124.8, 123.8, 122.9, 116.6, 62.1, 48.6, 29.2, 29.0, 26.8, 26.5, 14.0; HRMS (ESI)  $m/z$ : calcd. for  $C_{27}H_{23}O_4^+$   $[M + H]^+$ , 411.1591; found, 411.1587.

**Ethyl 8-cyclohexylidene-10-oxo-7,10-dihydro-8H-phenaleno[1,9-gh]isochromene-7-carboxylate (3qe)**

Yellow solid (53% yield);  $^1H$  NMR (600 MHz, Chloroform-*d*)  $\delta$  9.59 (d,  $J = 9.4$  Hz, 1H), 8.35 – 8.30 (m, 2H), 8.28 (d,  $J = 7.5$  Hz, 1H), 8.22 (d,  $J = 8.8$  Hz, 1H), 8.12 – 8.03 (m, 3H), 5.29 (s, 1H), 4.23 – 4.10 (m, 2H), 2.69 – 2.62 (m, 1H), 2.49 – 2.43 (m, 1H),

2.36 – 2.27 (m, 2H), 1.67 – 1.53 (m, 6H), 1.21 (t,  $J = 7.1$  Hz, 3H);  $^{13}\text{C}$  NMR (126 MHz, Chloroform-*d*)  $\delta$  169.3, 162.8, 135.1, 134.6, 134.1, 132.4, 131.0, 130.8, 130.7, 130.3, 127.0, 127.0, 126.7, 125.2, 124.8, 124.2, 123.8, 123.1, 116.6, 62.1, 46.4, 29.2, 27.7, 27.0, 26.9, 26.4, 14.0; HRMS (ESI)  $m/z$ : calcd. for  $\text{C}_{28}\text{H}_{25}\text{O}_4^+$  [ $\text{M} + \text{H}$ ] $^+$ , 425.1747; found, 425.1758.

**Ethyl 8-(butan-2-ylidene)-10-oxo-7,10-dihydro-8H-phenaleno[1,9-gh]isochromene-7-carboxylate (3qg)**

Yellow solid (43% yield);  $^1\text{H}$  NMR (500 MHz, Chloroform-*d*)  $\delta$  9.59 (dd,  $J = 9.5, 6.0$  Hz, 2H), 8.34 – 8.30 (m, 4H), 8.27 (d,  $J = 7.5$  Hz, 2H), 8.22 (d,  $J = 8.8$  Hz, 2H), 8.11 – 8.03 (m, 6H), 5.26 (s, 1H), 5.23 (s, 1H), 4.22 – 4.10 (m, 4H), 2.45 – 2.33 (m, 2H), 2.32 – 2.25 (m, 2H), 1.91 (s, 3H), 1.91 (s, 3H), 1.20 (td,  $J = 7.1, 1.8$  Hz, 6H), 1.11 (t,  $J = 7.5$  Hz, 3H), 1.05 (t,  $J = 7.6$  Hz, 3H);  $^{13}\text{C}$  NMR (126 MHz, Chloroform-*d*)  $\delta$  169.2, 169.2, 162.7, 136.6, 135.1, 134.4, 132.4, 131.0, 131.0, 130.8, 130.3, 127.1, 127.0, 126.7, 125.1, 125.1, 124.8, 123.8, 123.0, 122.8, 121.8, 121.7, 116.6, 62.2, 62.1, 47.0, 46.8, 25.7, 23.8, 15.9, 14.7, 14.0, 14.0, 12.9, 12.2; HRMS (ESI)  $m/z$ : calcd. for  $\text{C}_{26}\text{H}_{23}\text{O}_4^+$  [ $\text{M} + \text{H}$ ] $^+$ , 399.1591; found, 399.1594.

**Methyl 1-oxo-3-(propan-2-ylidene)isochromane-4-carboxylate (3ah)**

Colorless oil (86% yield);  $^1\text{H}$  NMR (400 MHz, Chloroform-*d*)  $\delta$  8.14 (dd,  $J = 7.9, 1.4$  Hz, 1H), 7.61 (td,  $J = 7.6, 1.4$  Hz, 1H), 7.48 (td,  $J = 7.6, 1.2$  Hz, 1H), 7.38 (d,  $J = 7.6$  Hz, 1H), 4.89 (s, 1H), 3.68 (s, 3H), 1.84 (d,  $J = 7.4$  Hz, 6H);  $^{13}\text{C}$  NMR (126 MHz, Chloroform-*d*)  $\delta$  168.9, 161.9, 136.2, 135.2, 133.7, 129.9, 128.4, 127.0, 124.0, 117.3, 52.6, 44.3, 18.0, 16.8; HRMS (EI)  $m/z$ : calcd. for  $\text{C}_{14}\text{H}_{14}\text{O}_4^+$  [ $\text{M}$ ] $^+$ , 246.0887; found, 246.0896.

**Methyl 6-fluoro-1-oxo-3-(propan-2-ylidene)isochromane-4-carboxylate (3bh)**

Colorless oil (73% yield);  $^1\text{H}$  NMR (400 MHz, Chloroform-*d*)  $\delta$  8.17 (dd,  $J = 8.7, 5.6$  Hz, 1H), 7.16 (td,  $J = 8.5, 2.5$  Hz, 1H), 7.08 (dd,  $J = 8.4, 2.5$  Hz, 1H), 4.86 (s, 1H), 3.70 (s, 3H), 1.85 (s, 3H), 1.83 (s, 3H);  $^{13}\text{C}$  NMR (126 MHz, Chloroform-*d*)  $\delta$  170.3, 167.3

(d,  $J = 257.4$  Hz), 162.8, 139.9 (d,  $J = 9.2$  Hz), 137.7, 134.7 (d,  $J = 9.7$  Hz), 122.2 (d,  $J = 2.9$  Hz), 119.9, 117.9 (d,  $J = 22.0$  Hz), 116.0 (d,  $J = 22.8$  Hz), 54.6, 46.2, 19.8, 18.7; HRMS (ESI)  $m/z$ : calcd. for  $C_{14}H_{14}FO_4^+$   $[M + H]^+$ , 265.0871; found, 265.0872.

**Methyl 10-oxo-8-(propan-2-ylidene)-7,10-dihydro-8H-phenaleno[1,9-gh]isochromene-7-carboxylate (3qh)**

Yellow solid (65% yield);  $^1H$  NMR (500 MHz, Chloroform-*d*)  $\delta$  9.59 (d,  $J = 9.4$  Hz, 1H), 8.35 – 8.29 (m, 2H), 8.28 (d,  $J = 7.5$  Hz, 1H), 8.22 (d,  $J = 8.9$  Hz, 1H), 8.12 – 8.02 (m, 3H), 5.28 (s, 1H), 3.71 (s, 3H), 1.92 (d,  $J = 2.6$  Hz, 6H);  $^{13}C$  NMR (126 MHz, Chloroform-*d*)  $\delta$  169.7, 162.5, 136.5, 135.1, 134.2, 132.5, 131.0, 130.8, 130.8, 130.3, 127.1, 127.1, 126.7, 126.7, 125.1, 124.8, 123.8, 123.0, 116.4, 116.4, 53.1, 46.7, 18.5, 17.2; HRMS (ESI)  $m/z$ : calcd. for  $C_{24}H_{19}O_4^+$   $[M + H]^+$ , 371.1278; found, 371.1281.

## 7. NMR spectra of the products

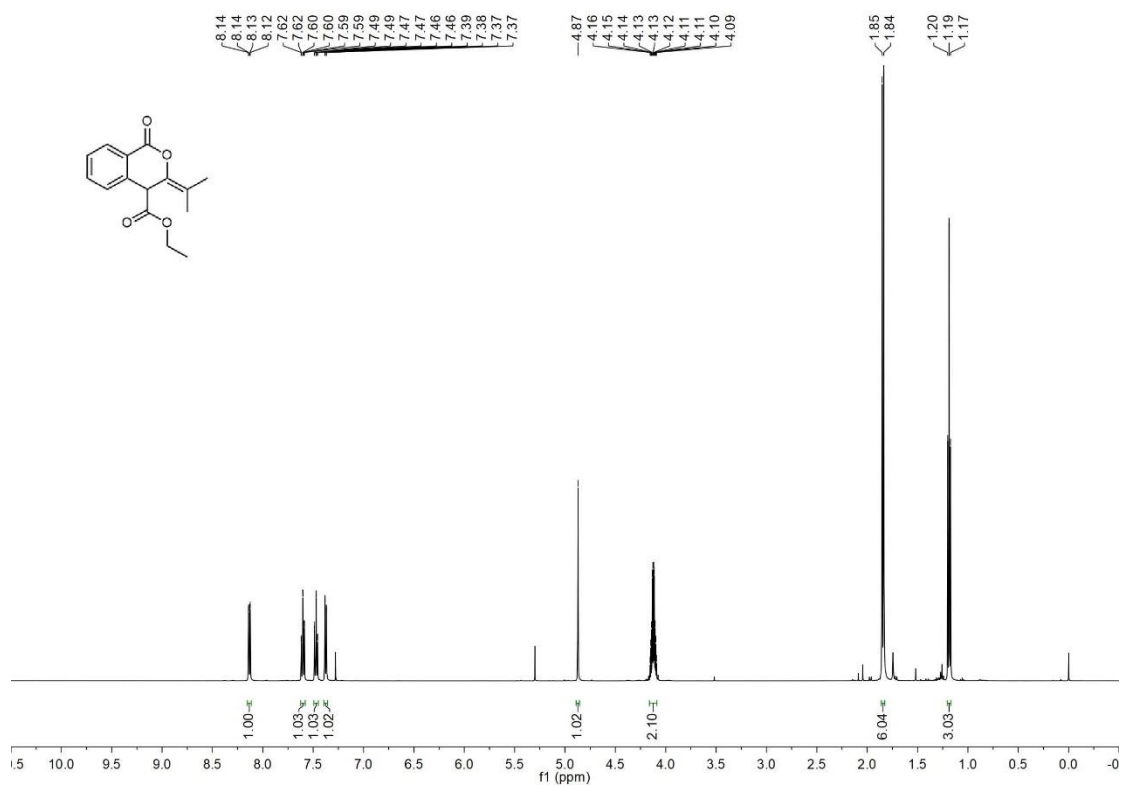

<sup>1</sup>H NMR spectrum of compound **3aa**

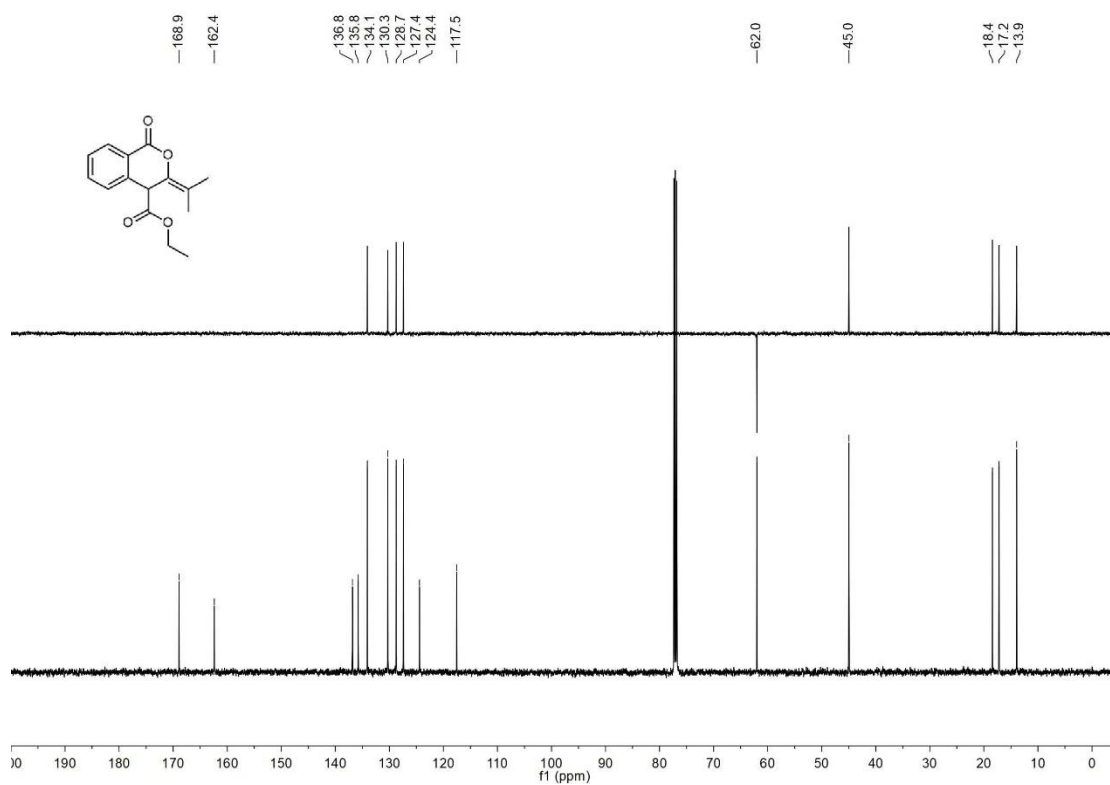

<sup>13</sup>C NMR spectrum of compound **3aa**

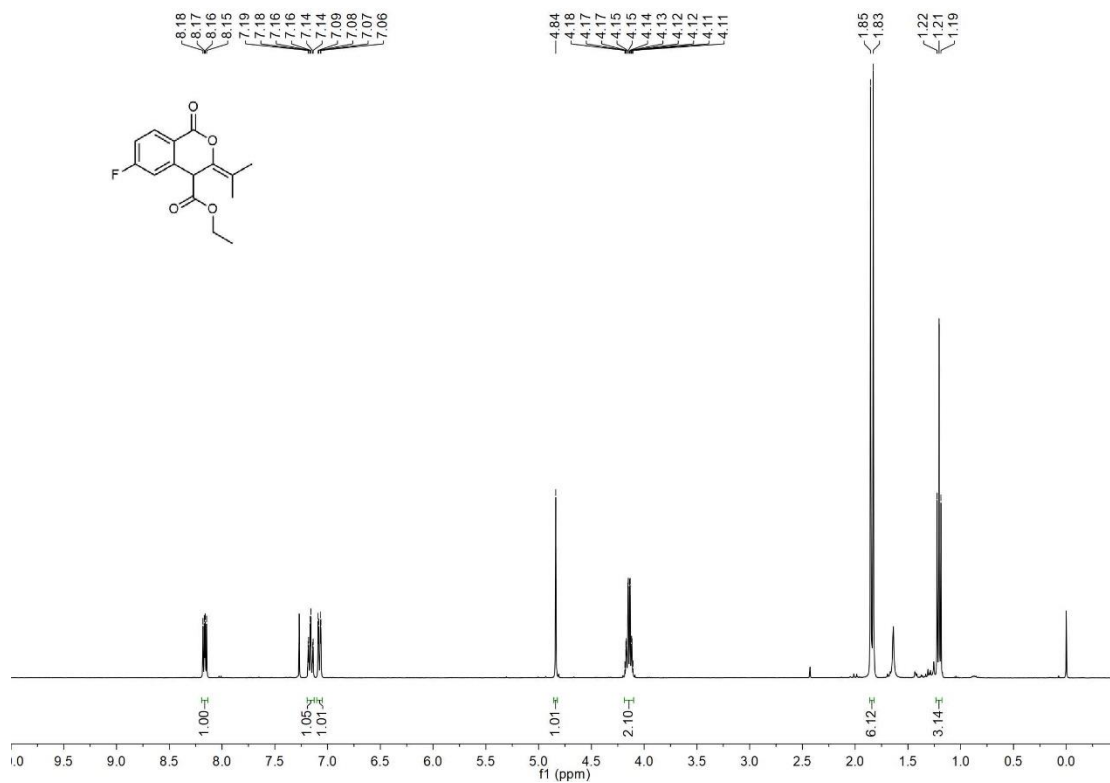

$^1\text{H}$  NMR spectrum of compound 3ba

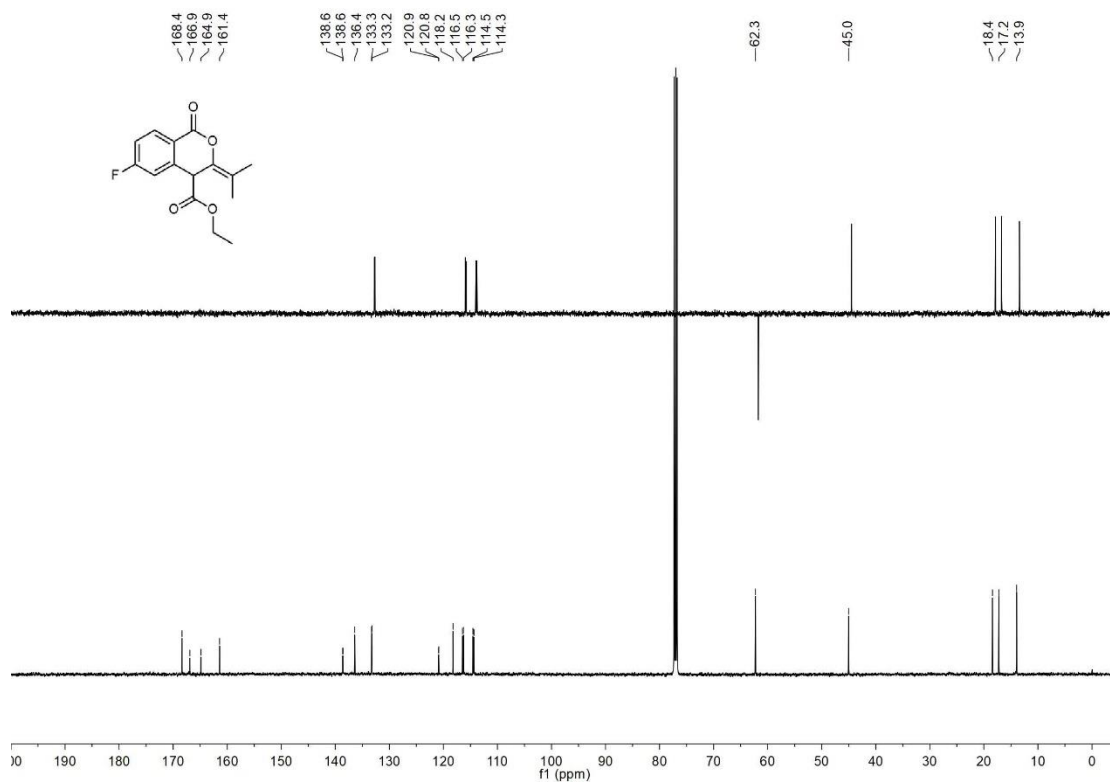

$^{13}\text{C}$  NMR spectrum of compound 3ba

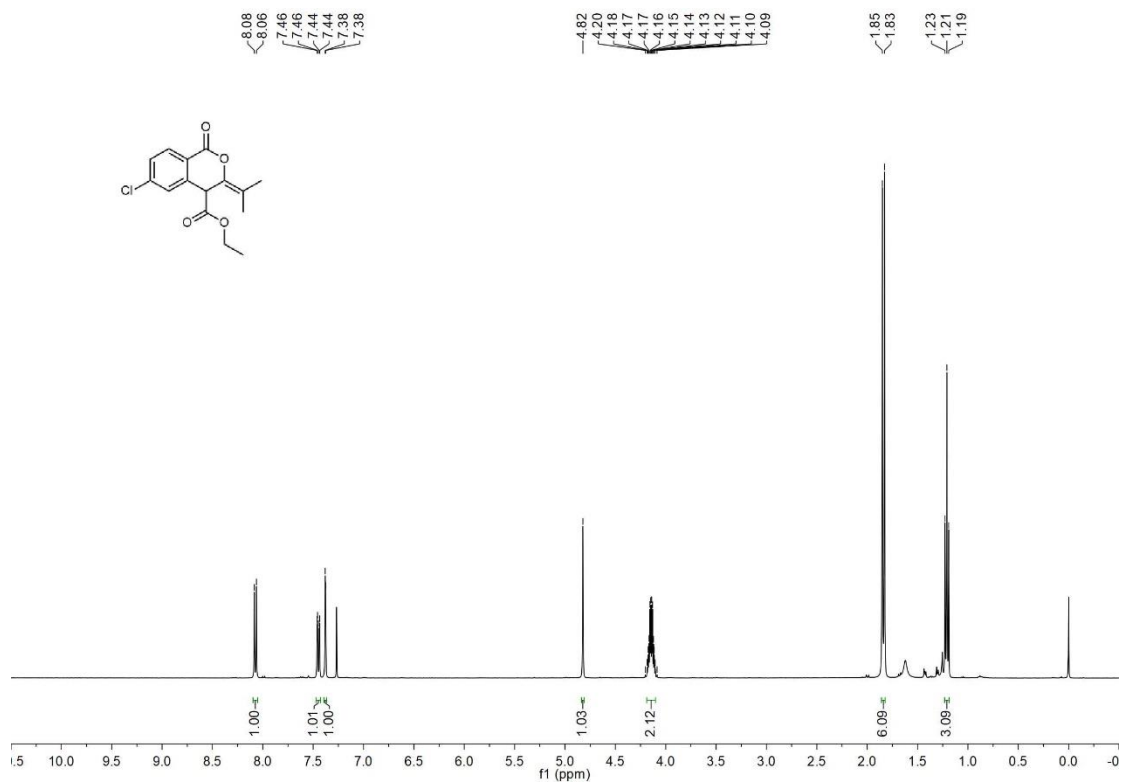

<sup>1</sup>H NMR spectrum of compound 3ca

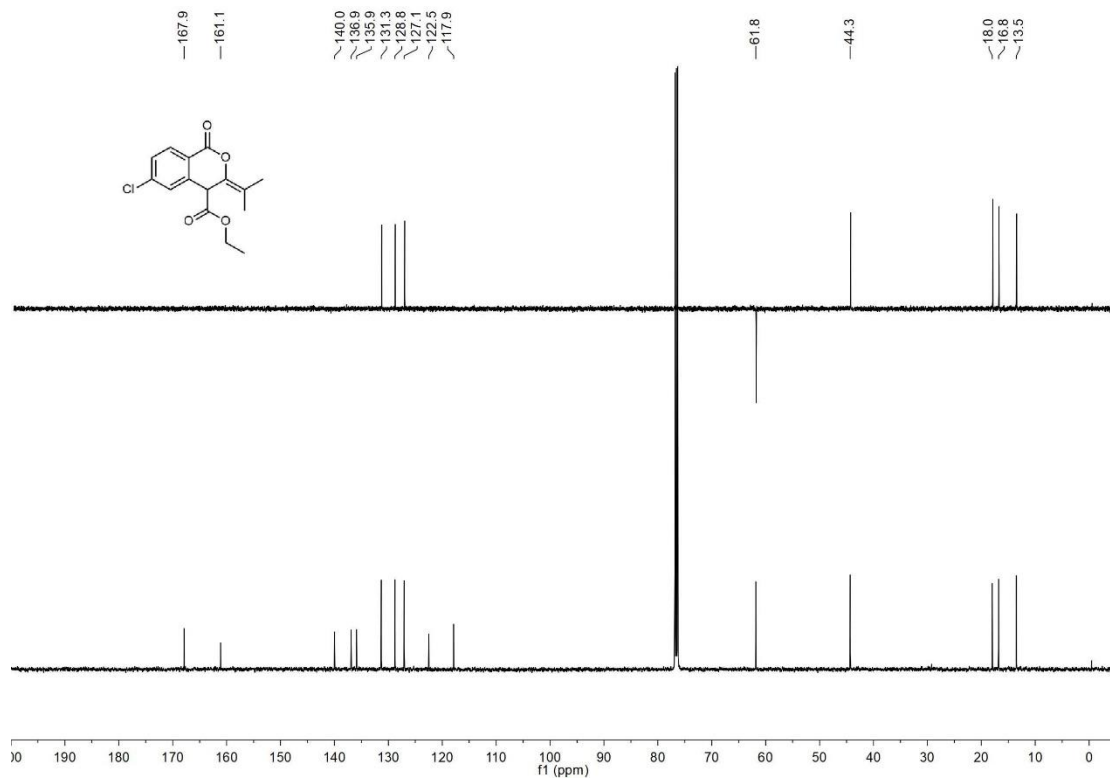

<sup>13</sup>C NMR spectrum of compound 3ca

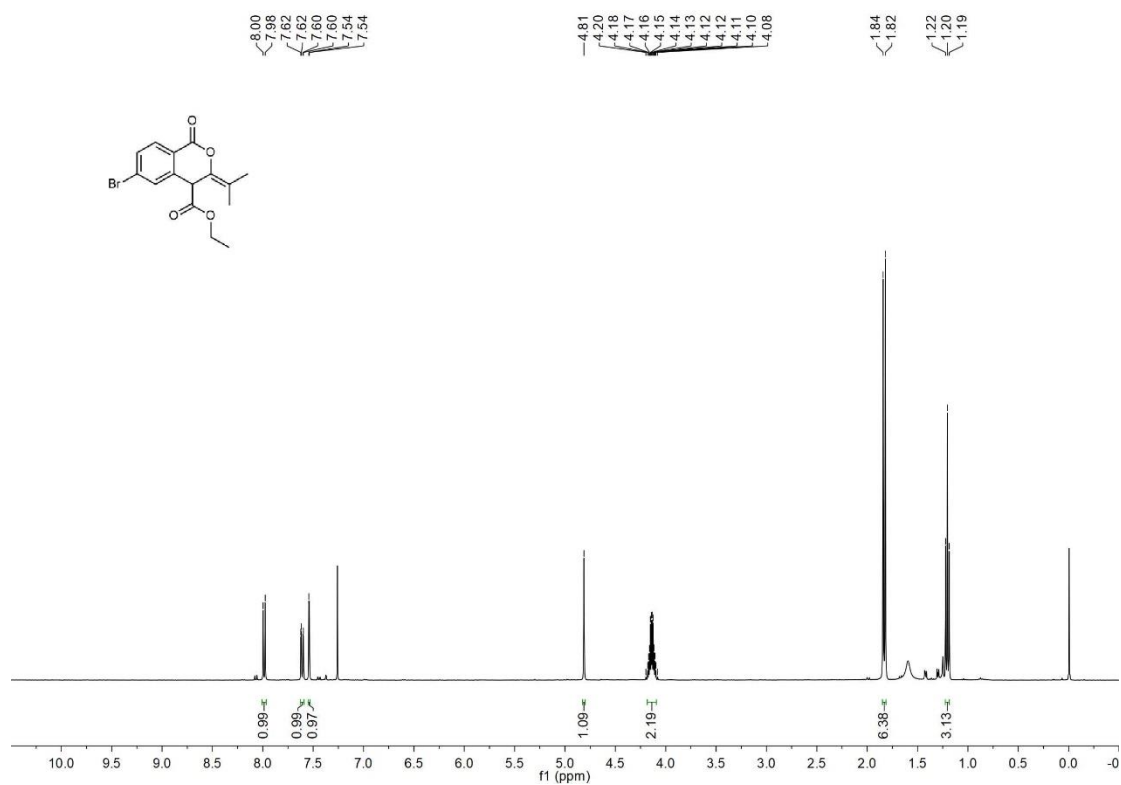

<sup>1</sup>H NMR spectrum of compound 3da

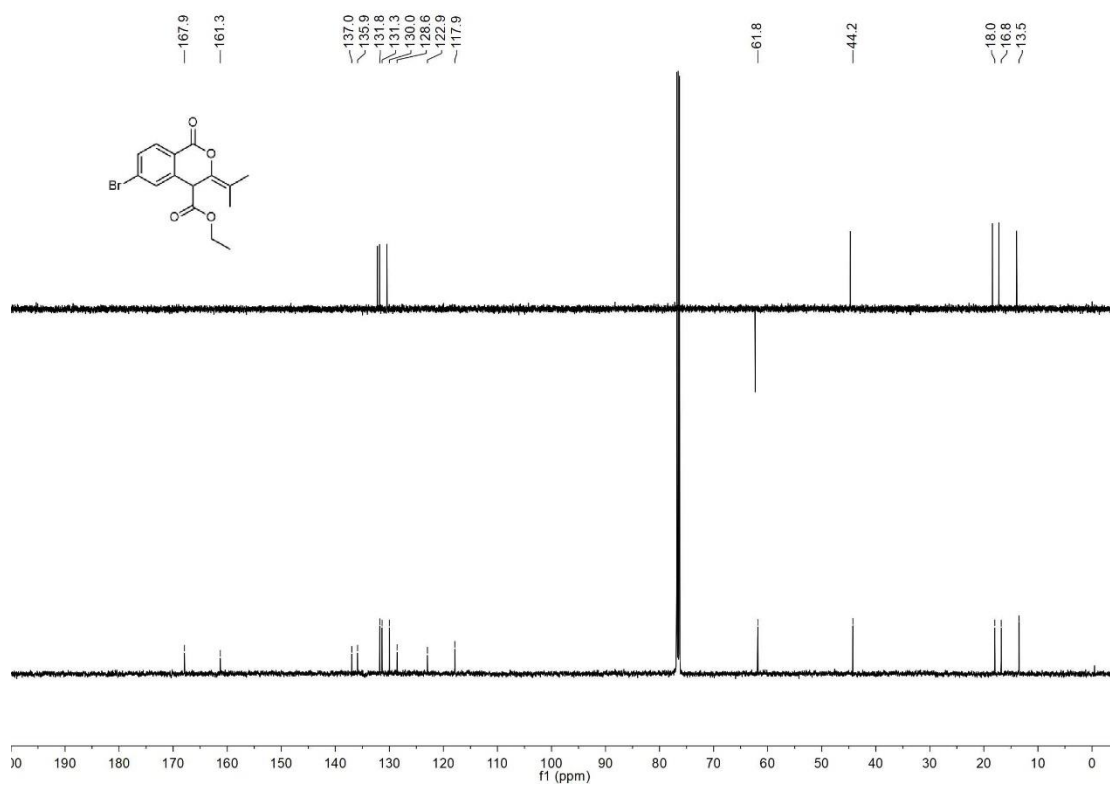

<sup>13</sup>C NMR spectrum of compound 3da



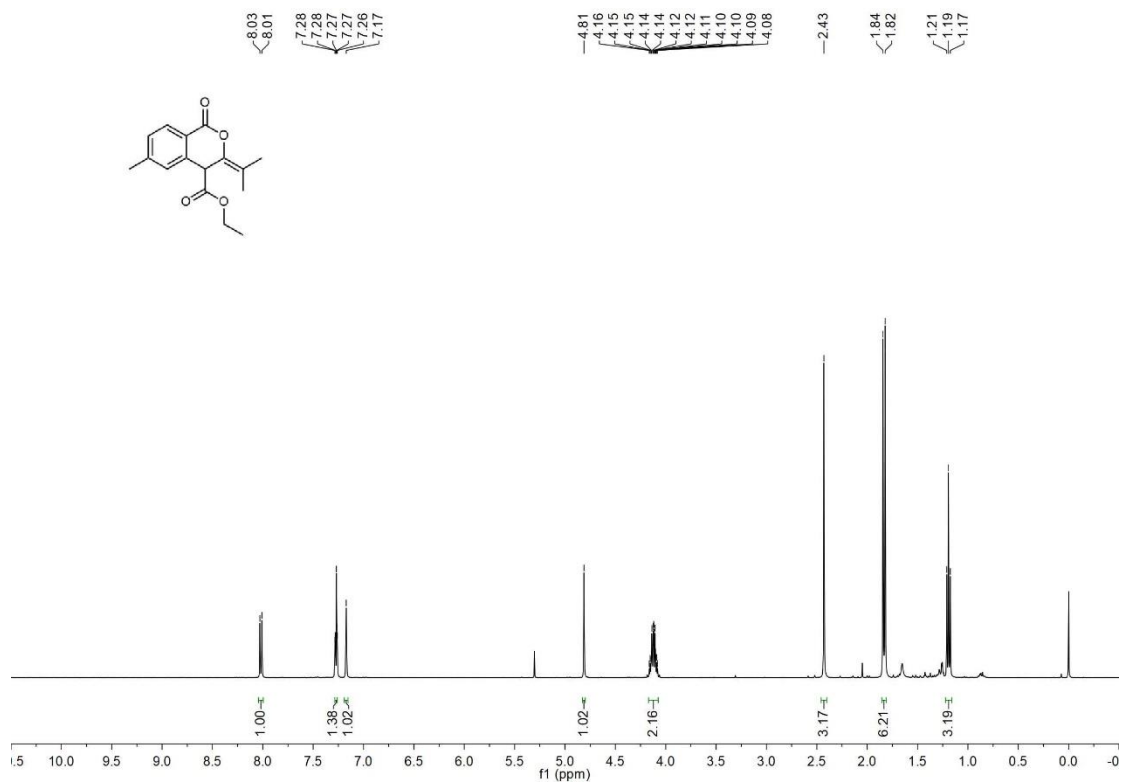

<sup>1</sup>H NMR spectrum of compound 3ea

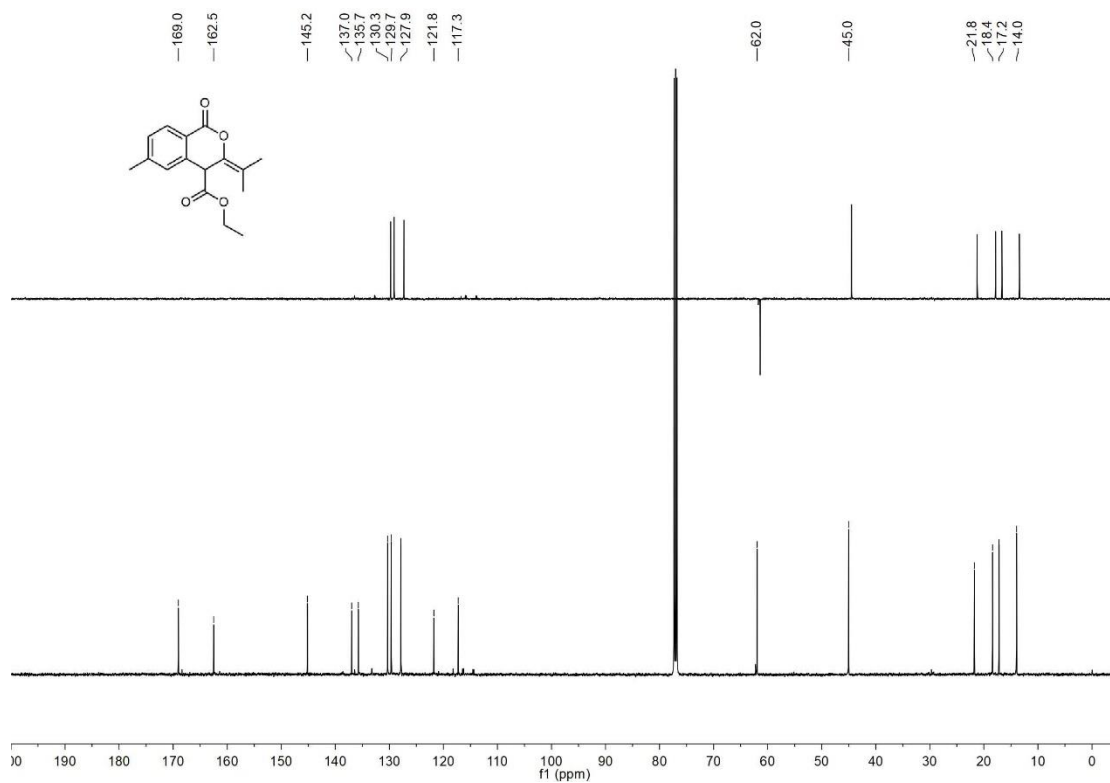

<sup>13</sup>C NMR spectrum of compound 3ea

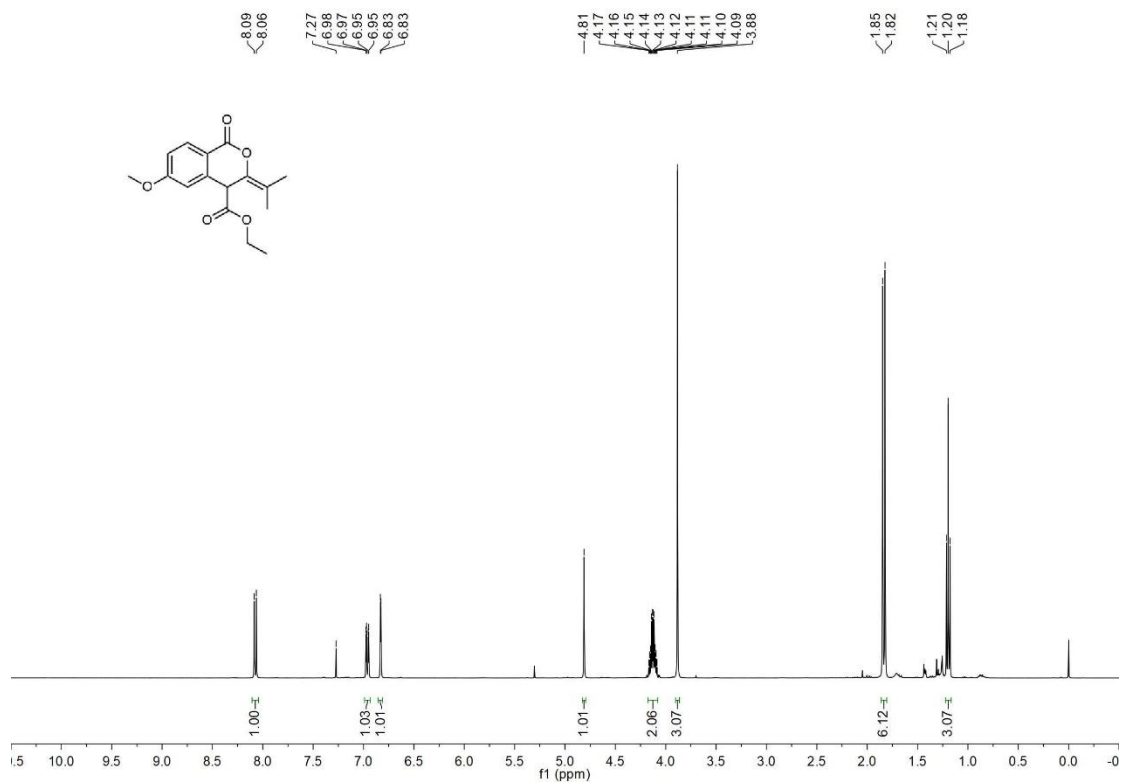

<sup>1</sup>H NMR spectrum of compound **3fa**

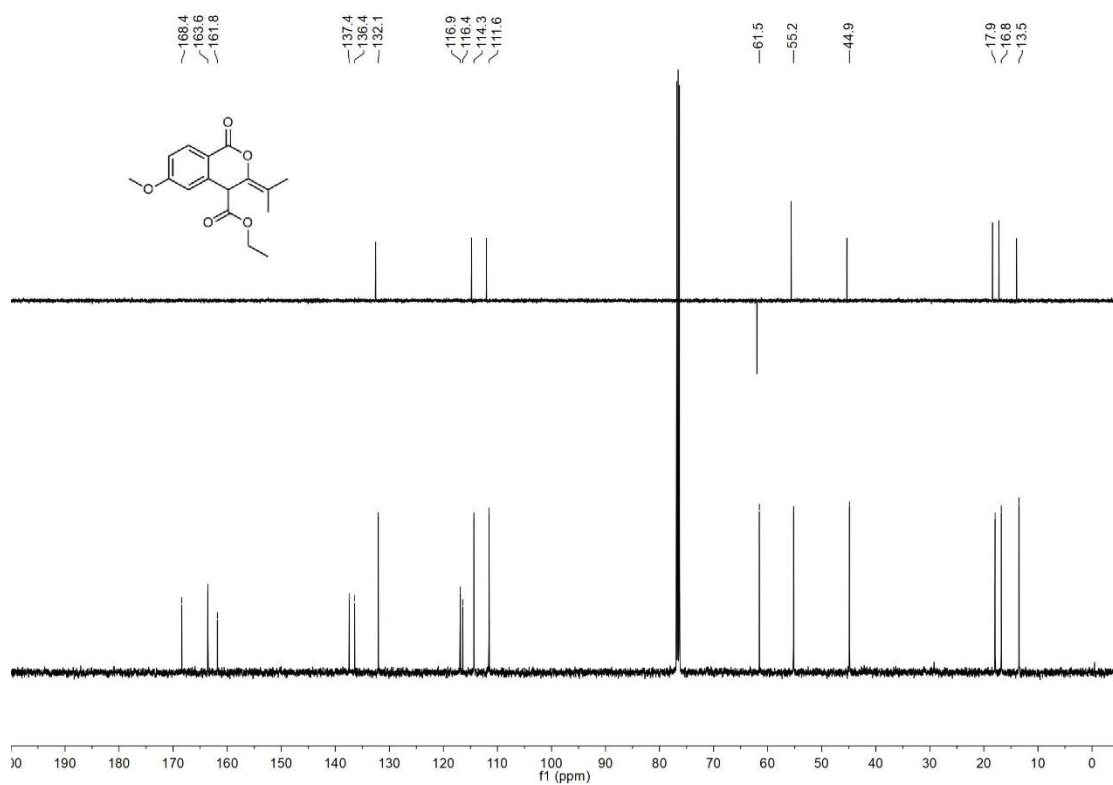

<sup>13</sup>C NMR spectrum of compound **3fa**

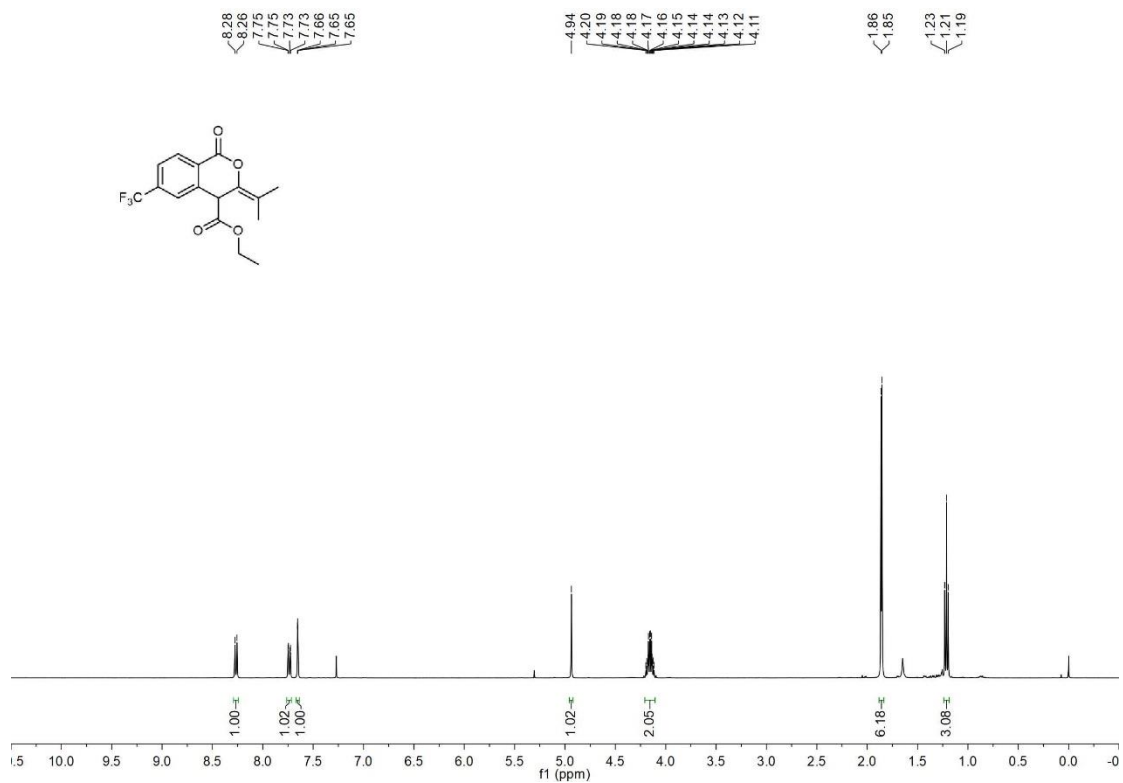

<sup>1</sup>H NMR spectrum of compound **3ga**

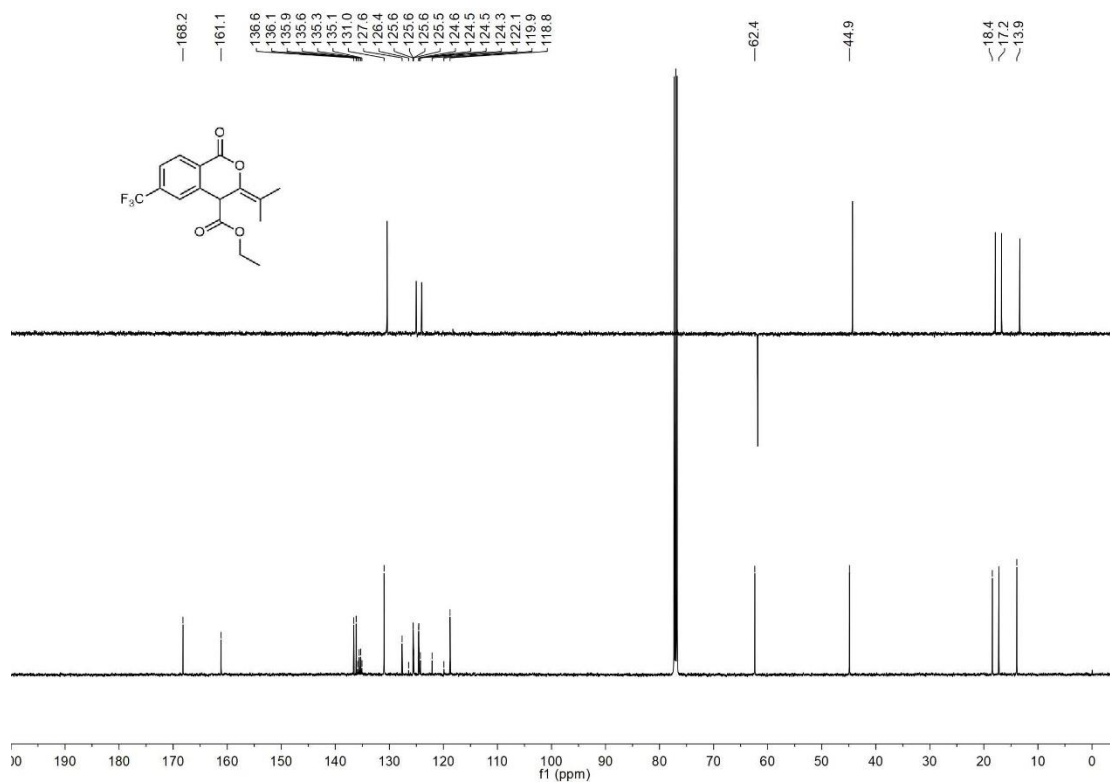

<sup>13</sup>C NMR spectrum of compound **3ga**

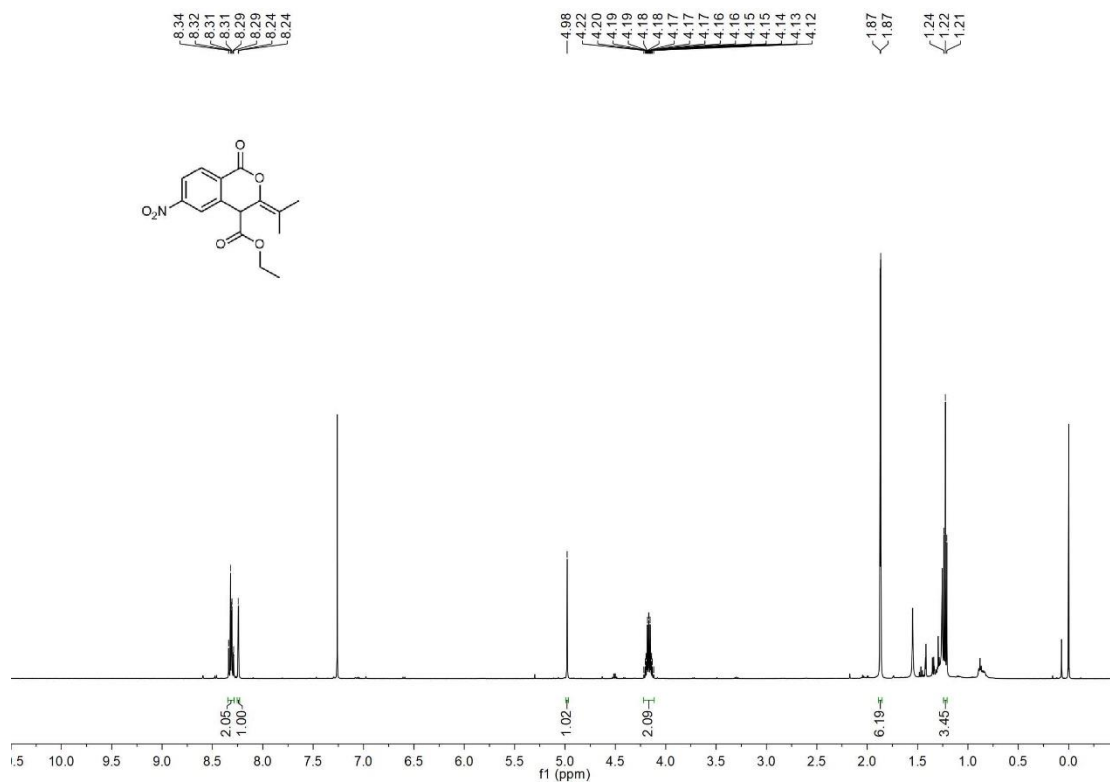

<sup>1</sup>H NMR spectrum of compound 3ha

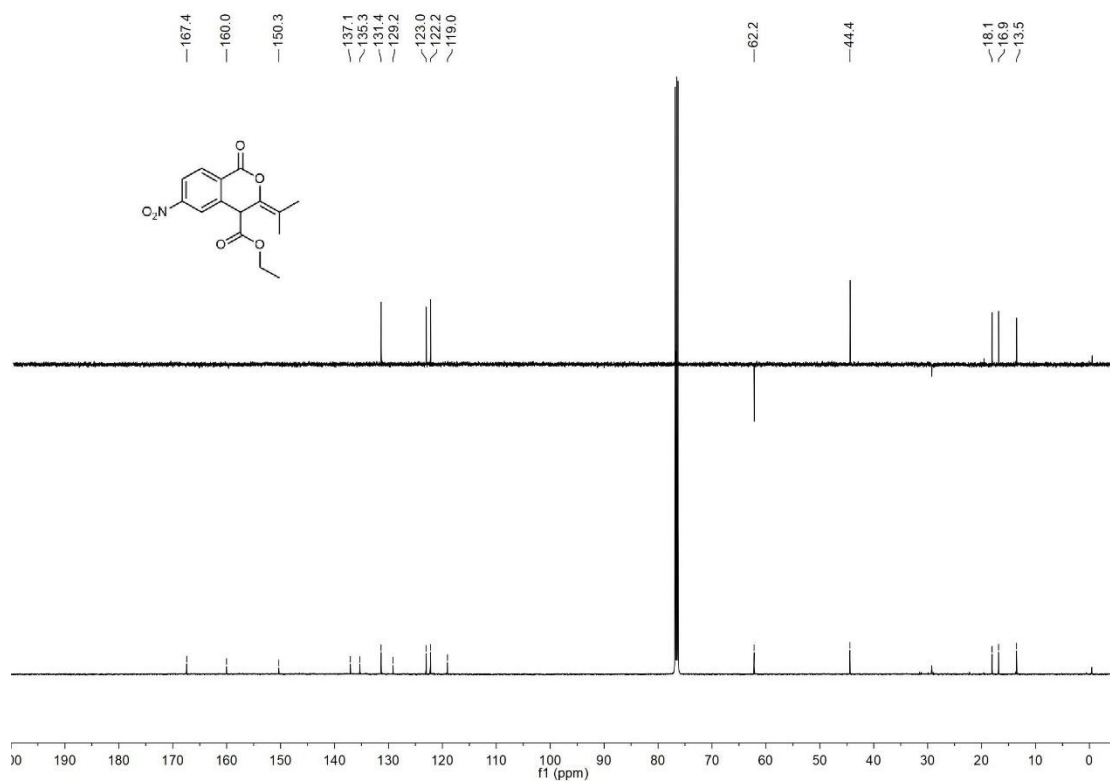

<sup>13</sup>C NMR spectrum of compound 3ha

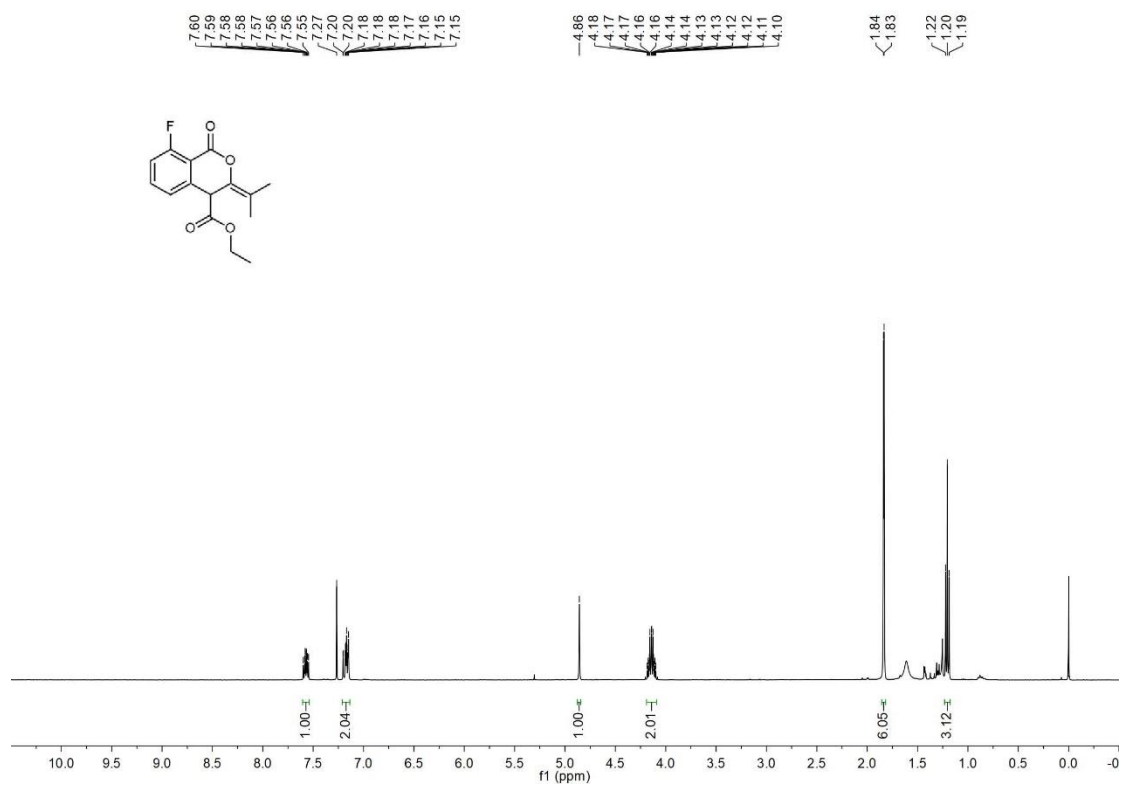

<sup>1</sup>H NMR spectrum of compound **3ia**

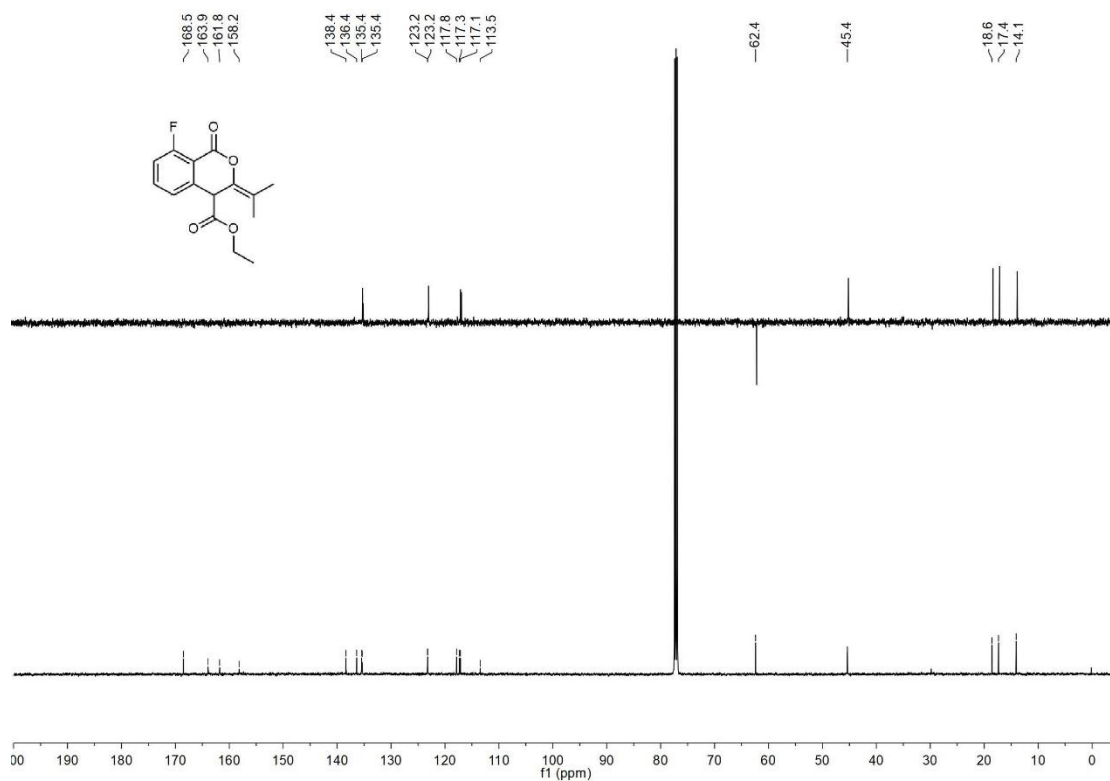

<sup>13</sup>C NMR spectrum of compound **3ia**

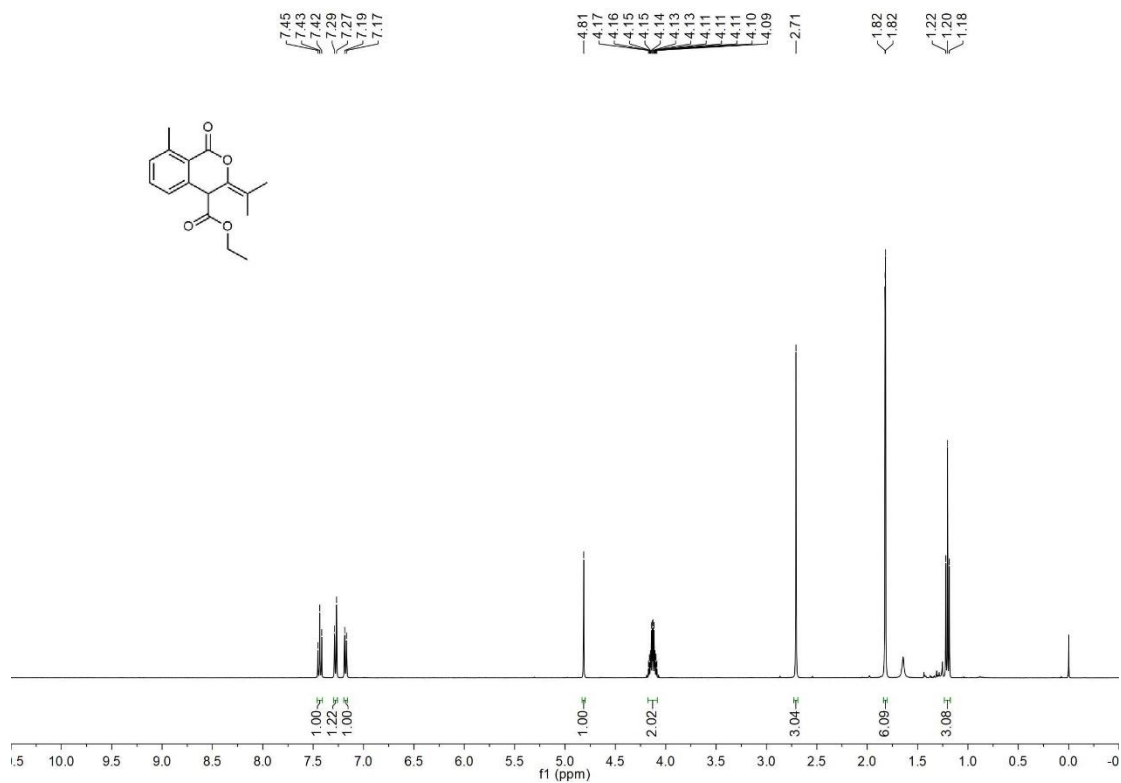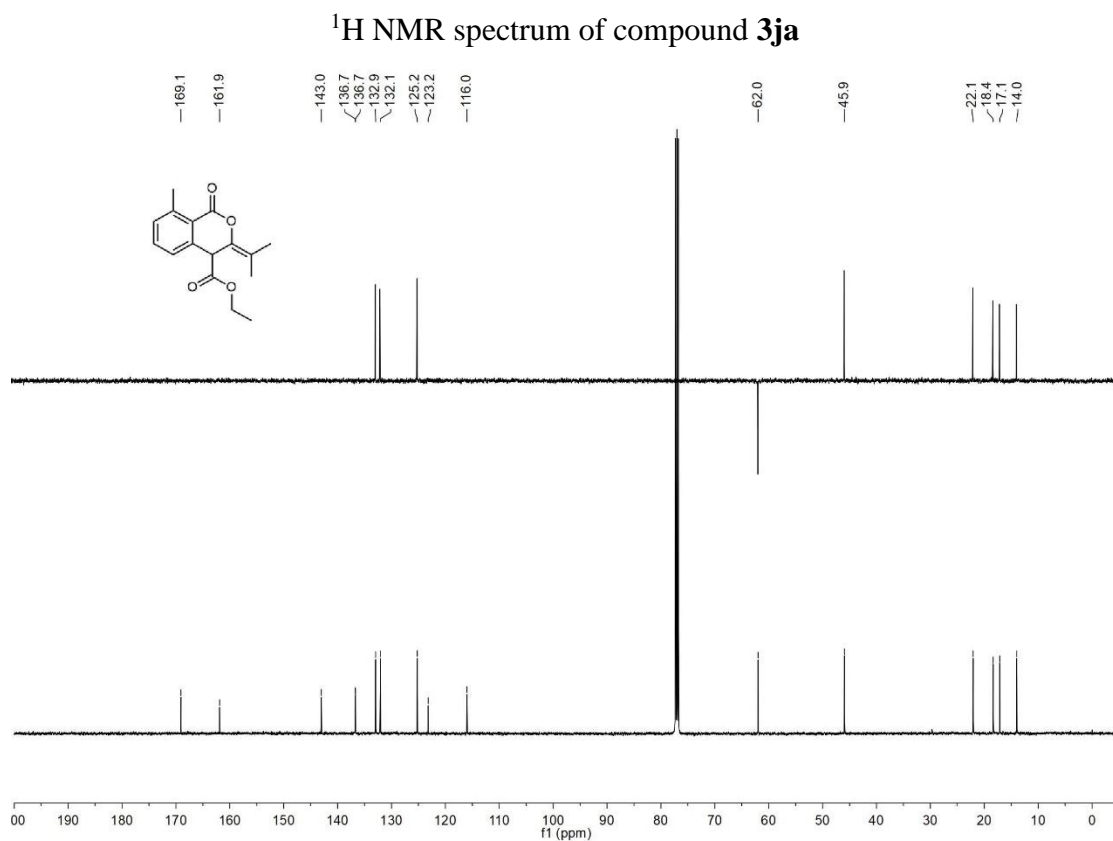

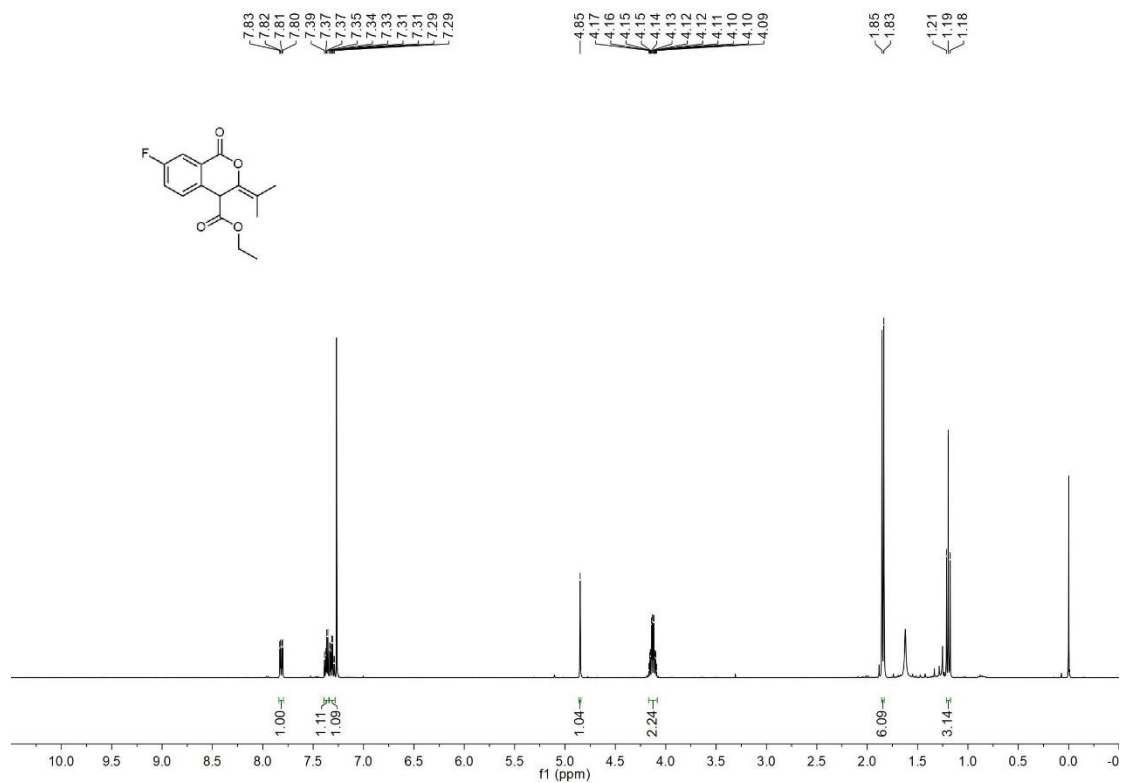

<sup>1</sup>H NMR spectrum of compound 3ka

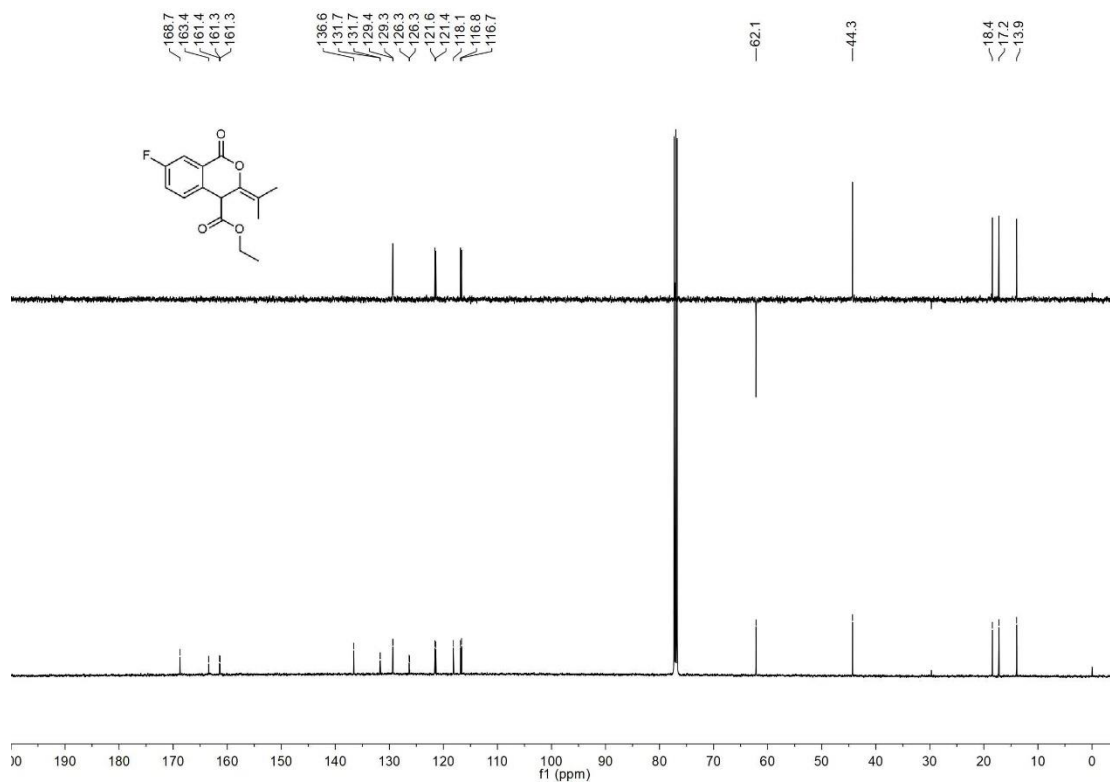

<sup>13</sup>C NMR spectrum of compound 3ka

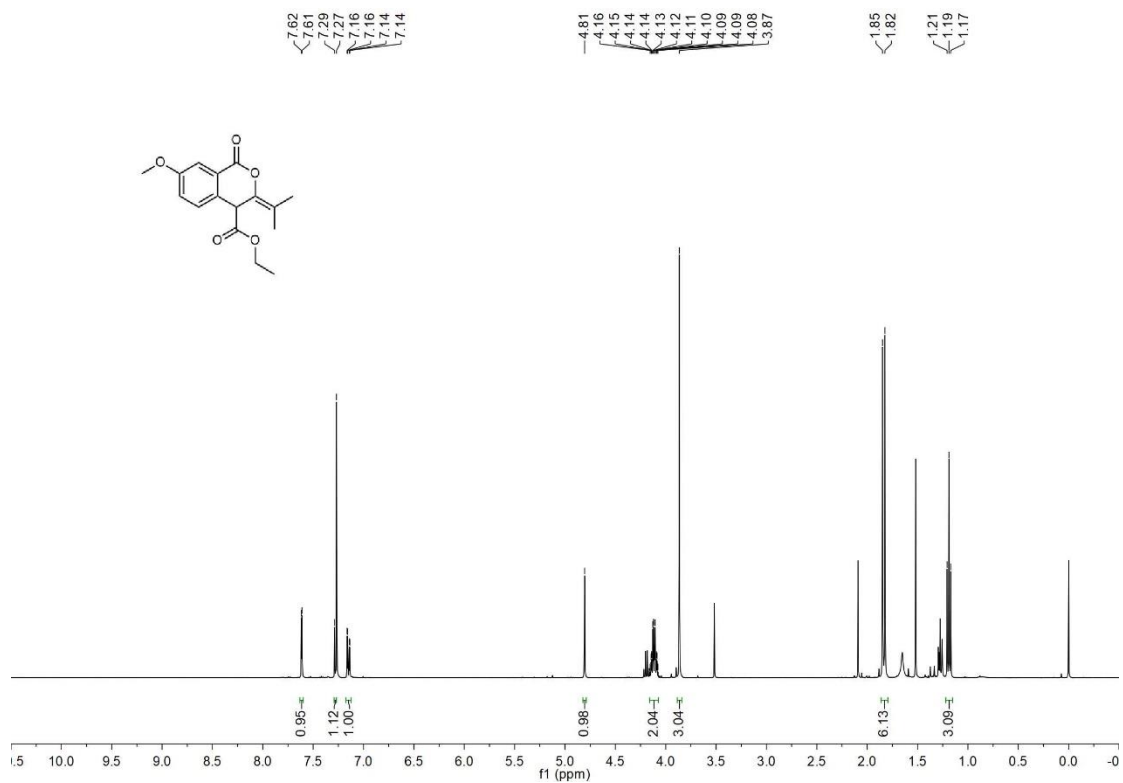

<sup>1</sup>H NMR spectrum of compound **3la**

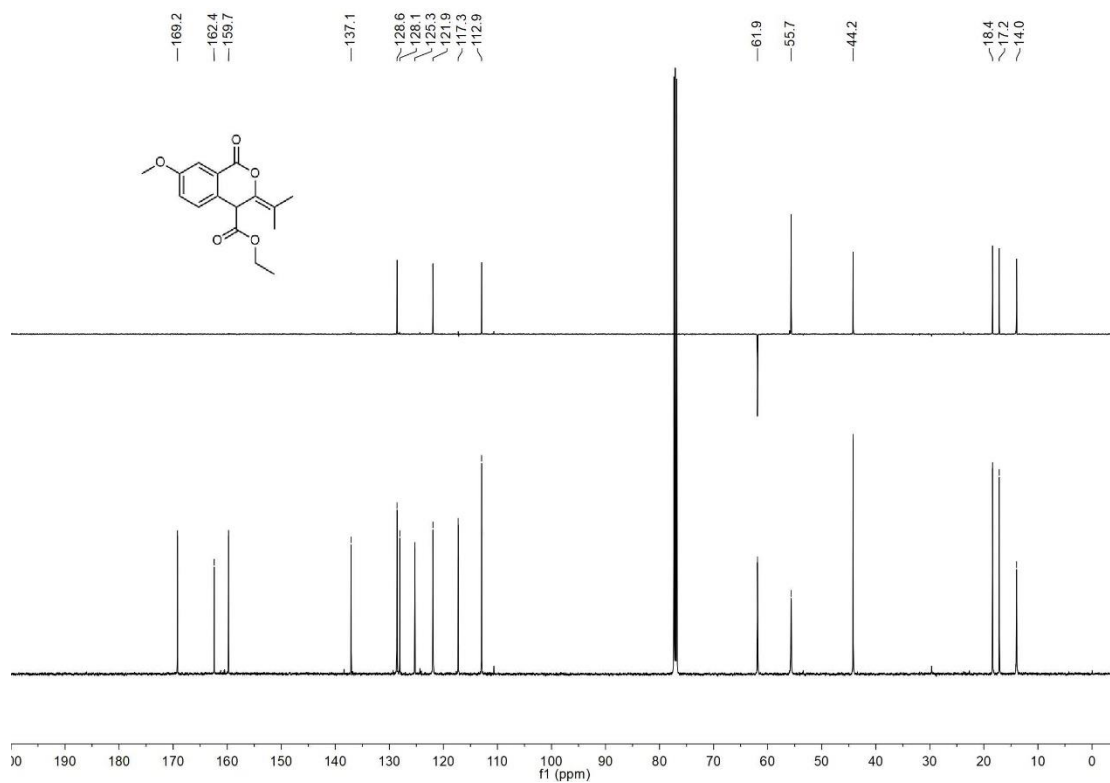

<sup>13</sup>C NMR spectrum of compound **3la**



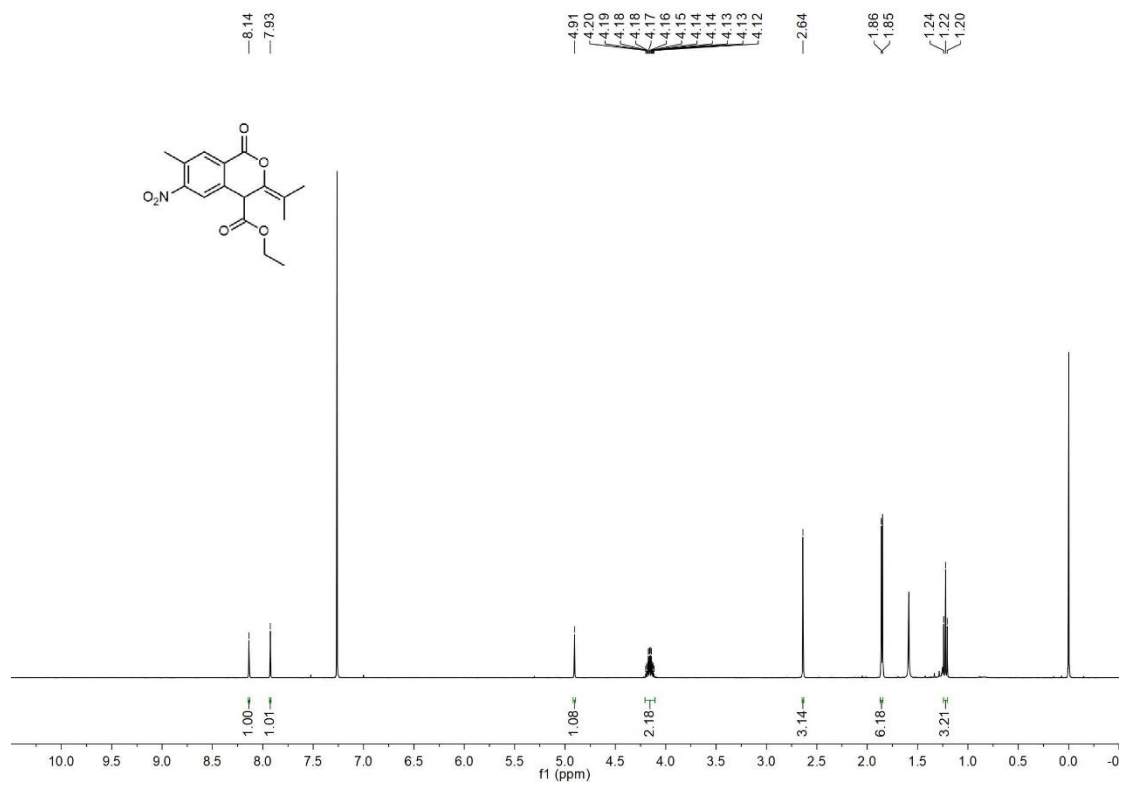

<sup>1</sup>H NMR spectrum of compound **3ma**

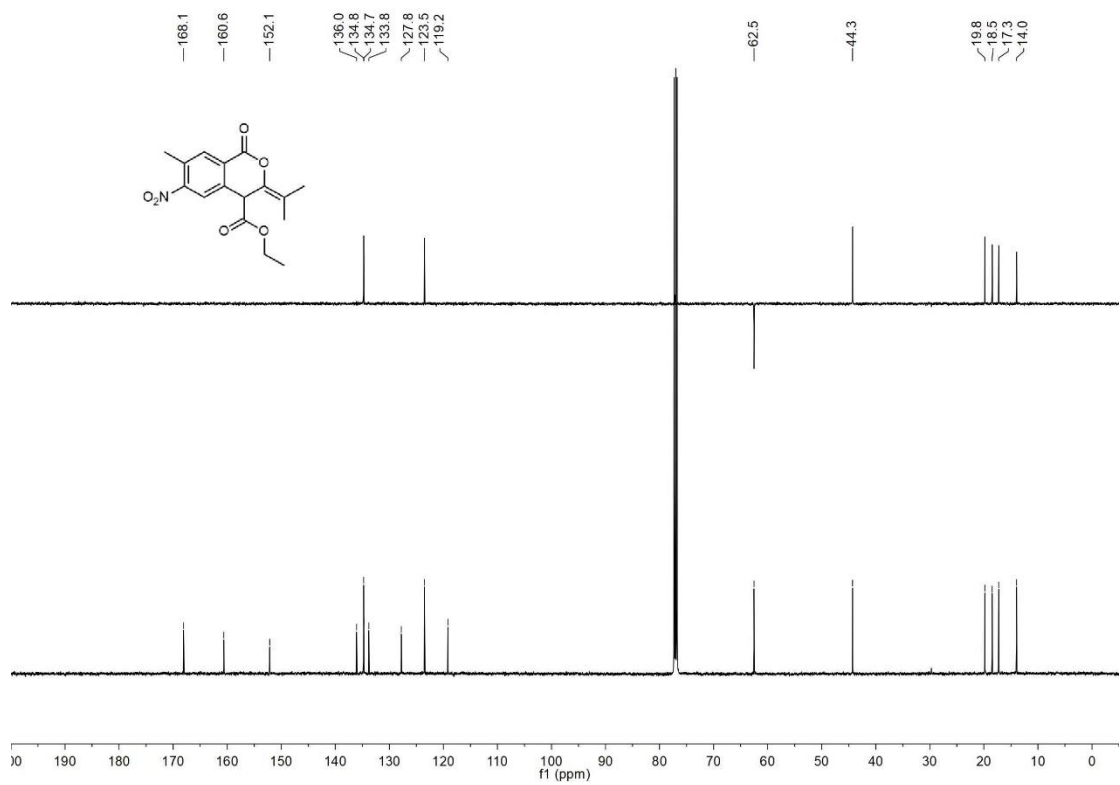

<sup>13</sup>C NMR spectrum of compound **3ma**

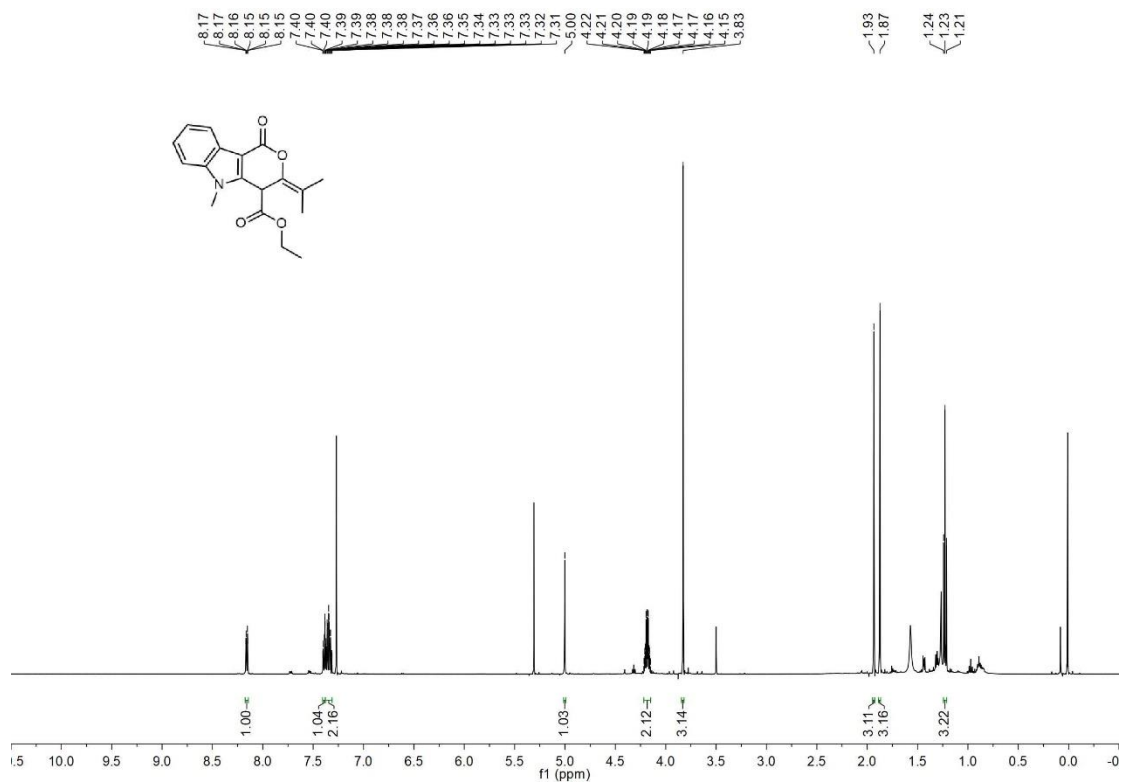

<sup>1</sup>H NMR spectrum of compound 3na

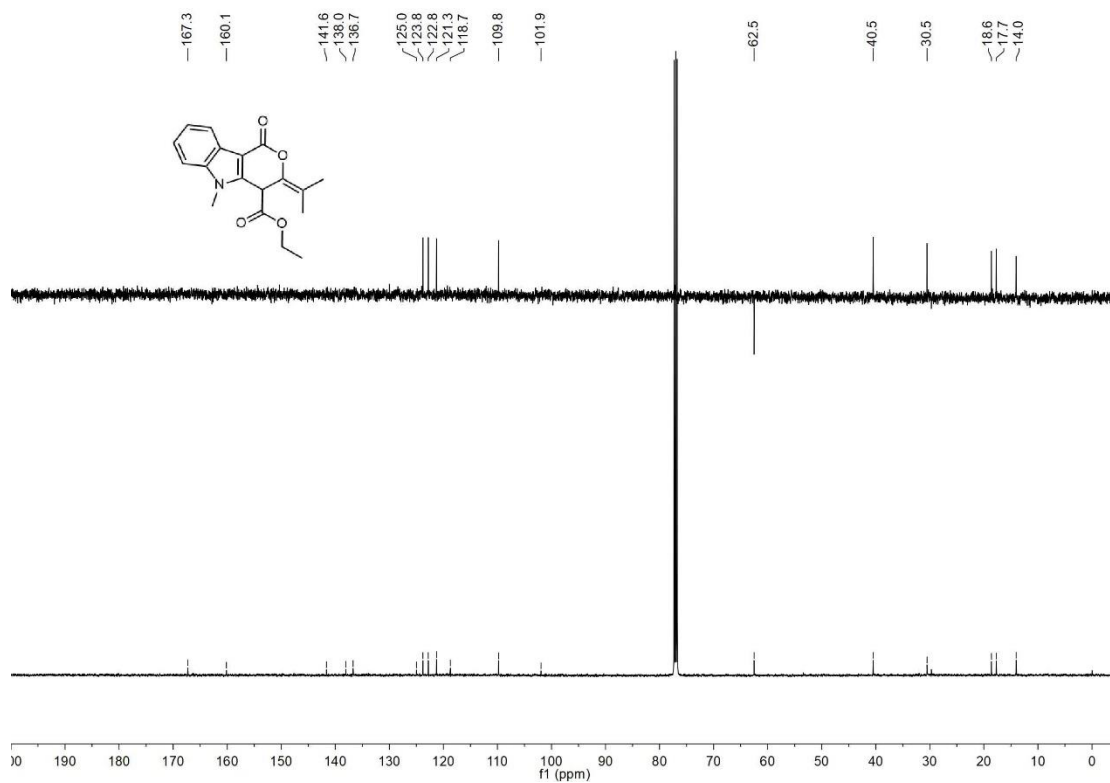

<sup>13</sup>C NMR spectrum of compound 3na

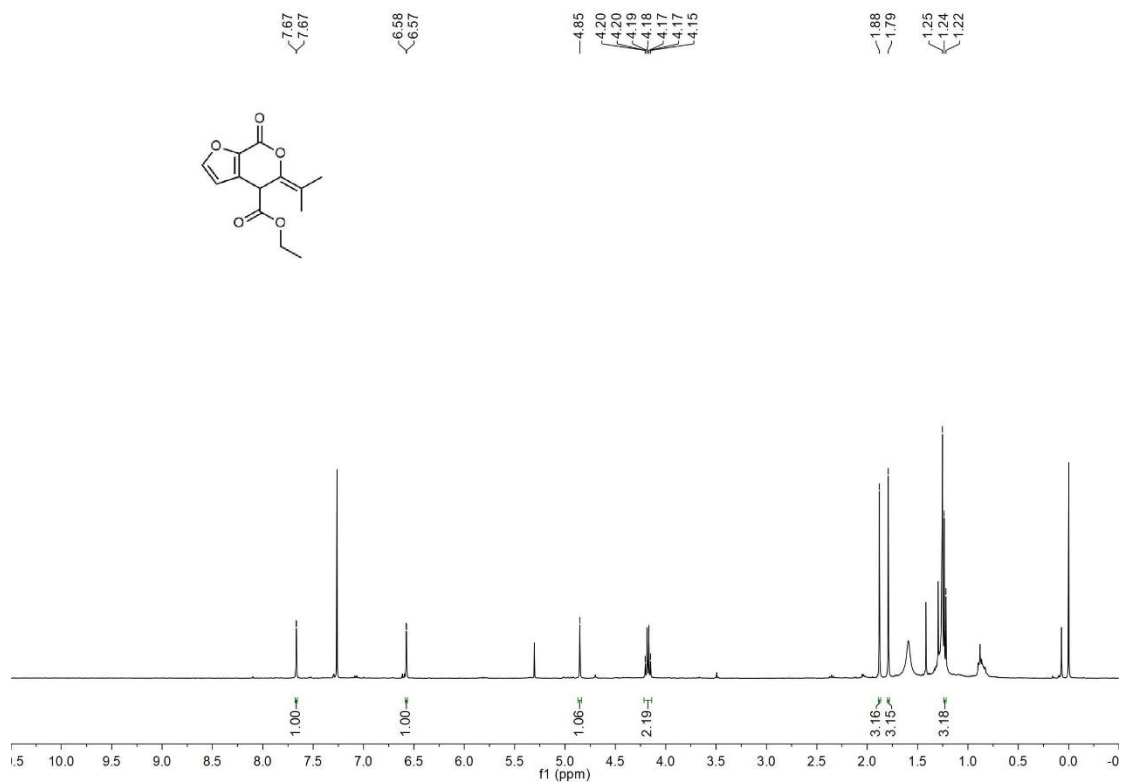

<sup>1</sup>H NMR spectrum of compound 30a

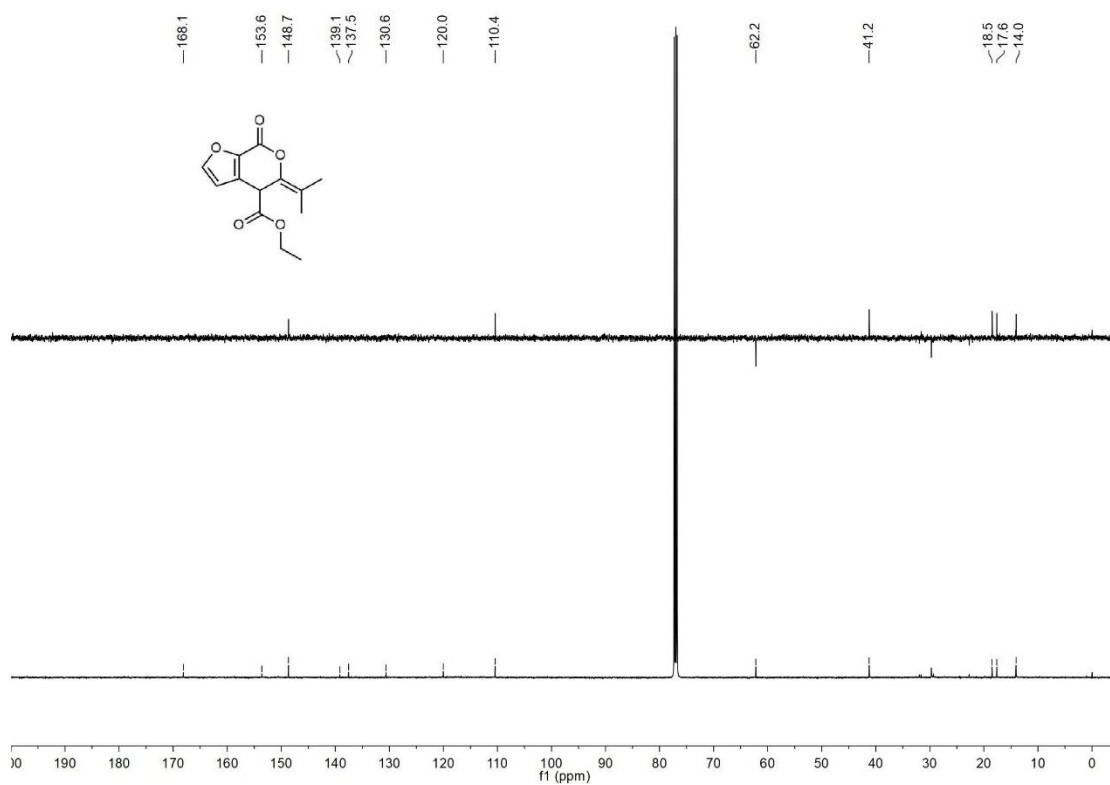

<sup>13</sup>C NMR spectrum of compound 30a

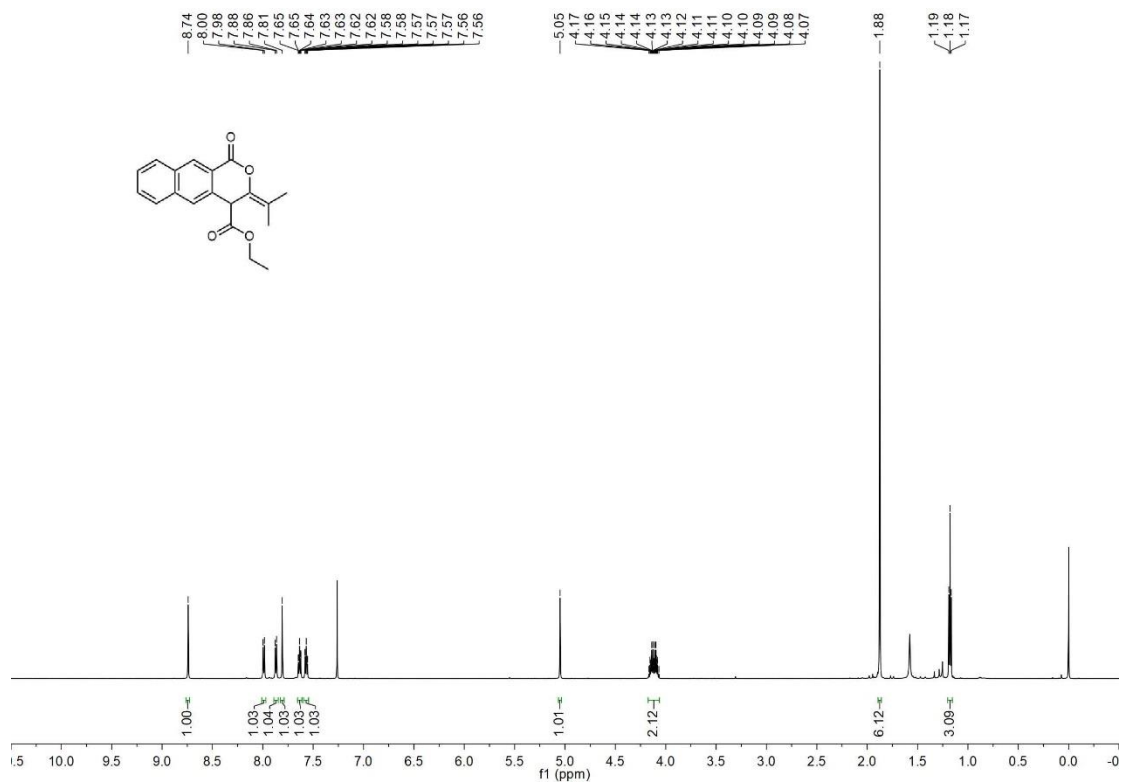

<sup>1</sup>H NMR spectrum of compound 3pa

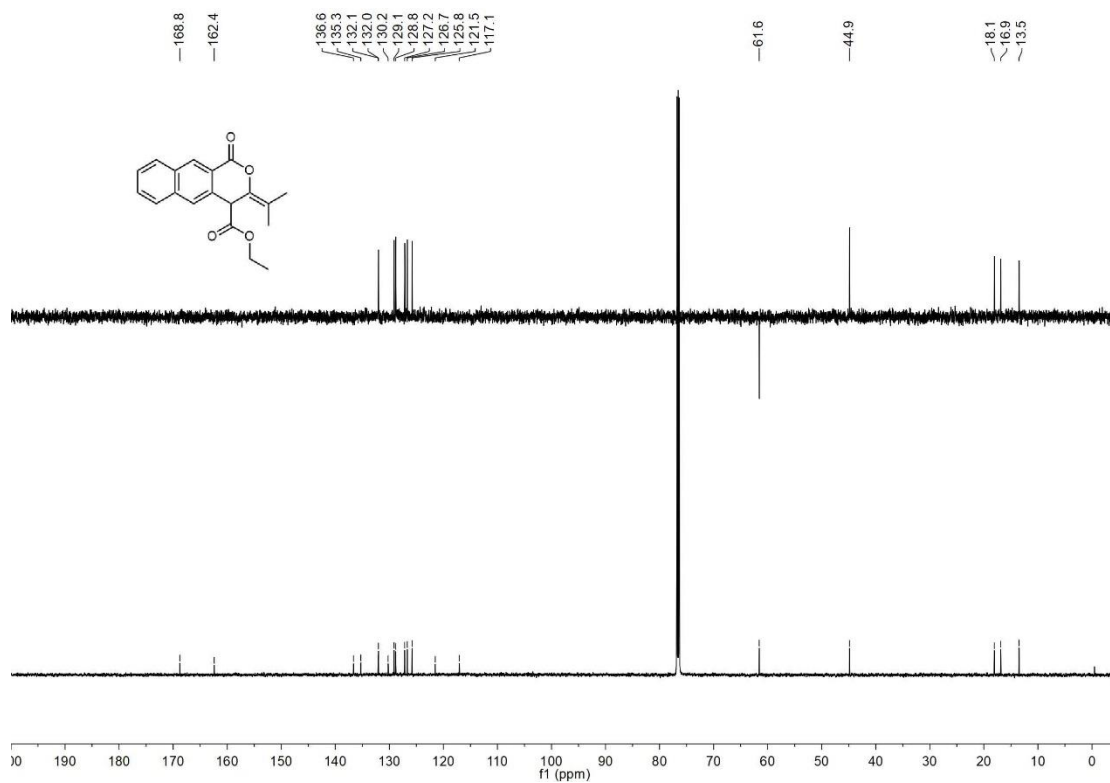

<sup>13</sup>C NMR spectrum of compound 3pa

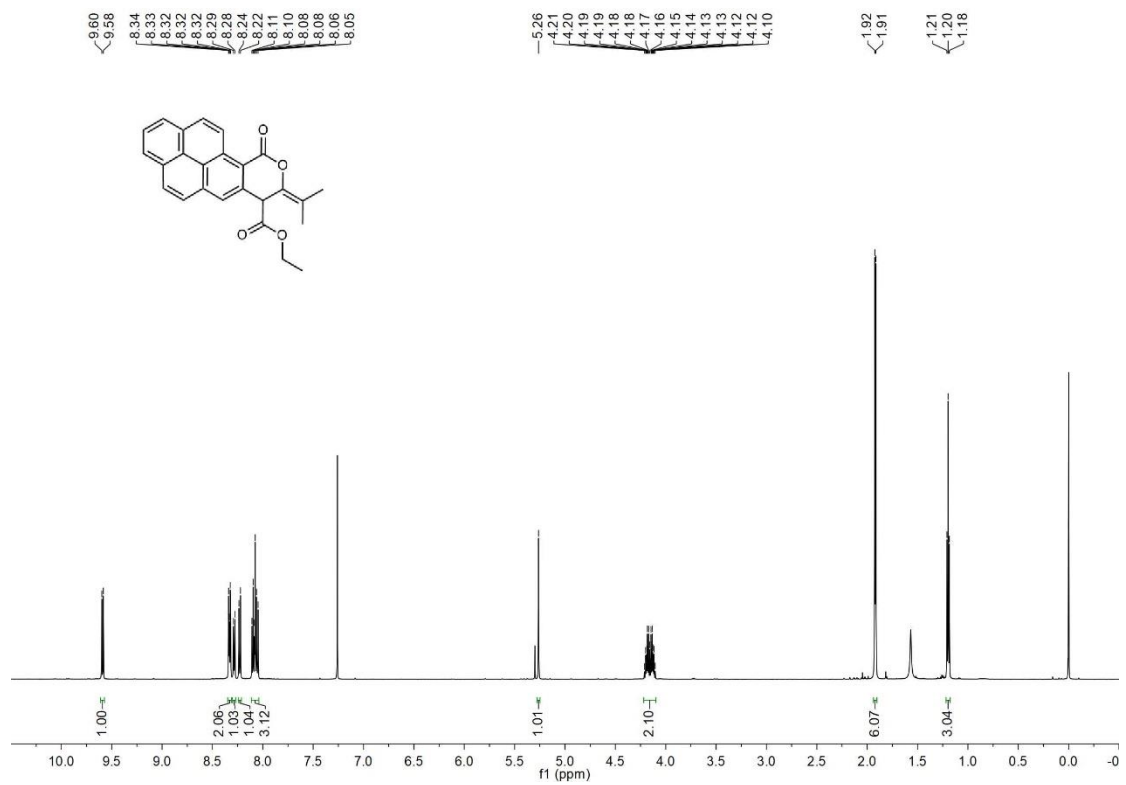

<sup>1</sup>H NMR spectrum of compound 3qa

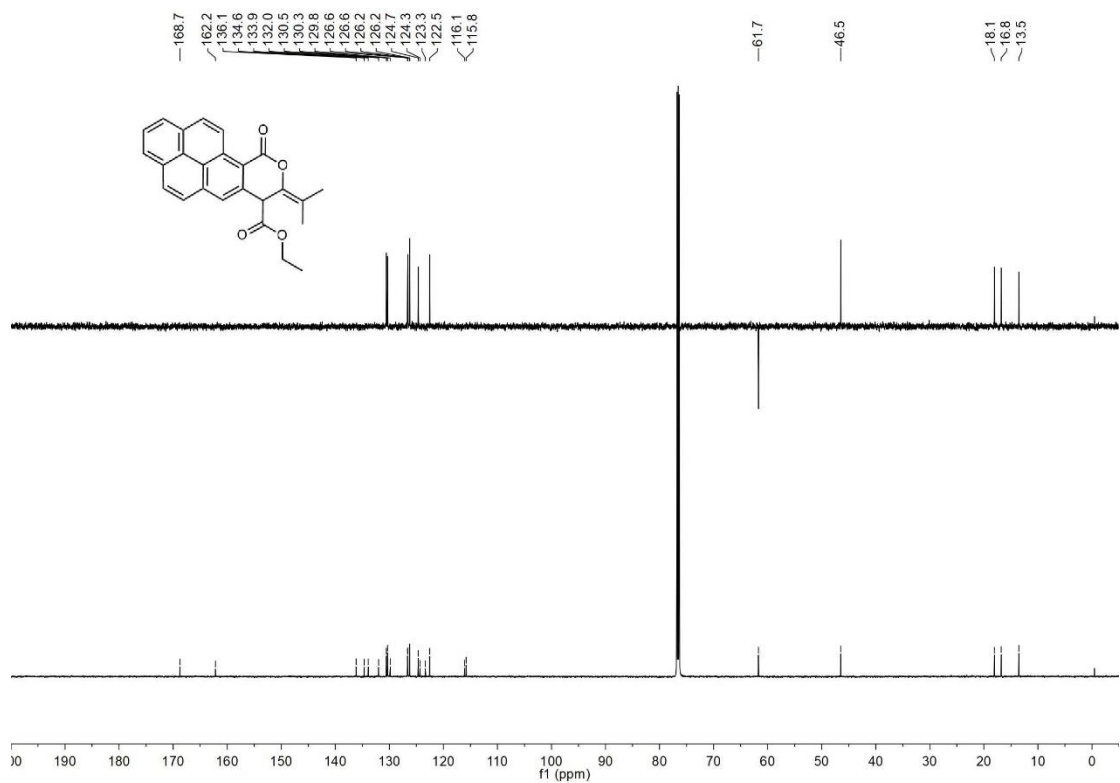

<sup>13</sup>C NMR spectrum of compound 3qa

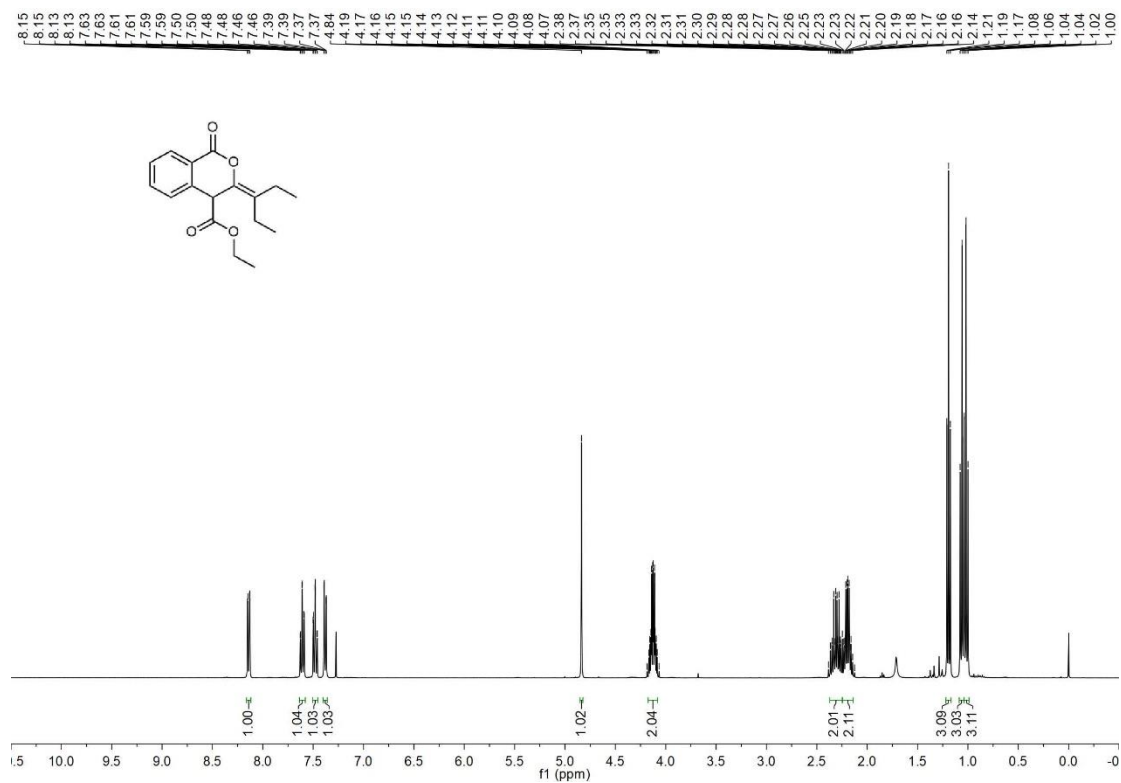

<sup>1</sup>H NMR spectrum of compound 3ab

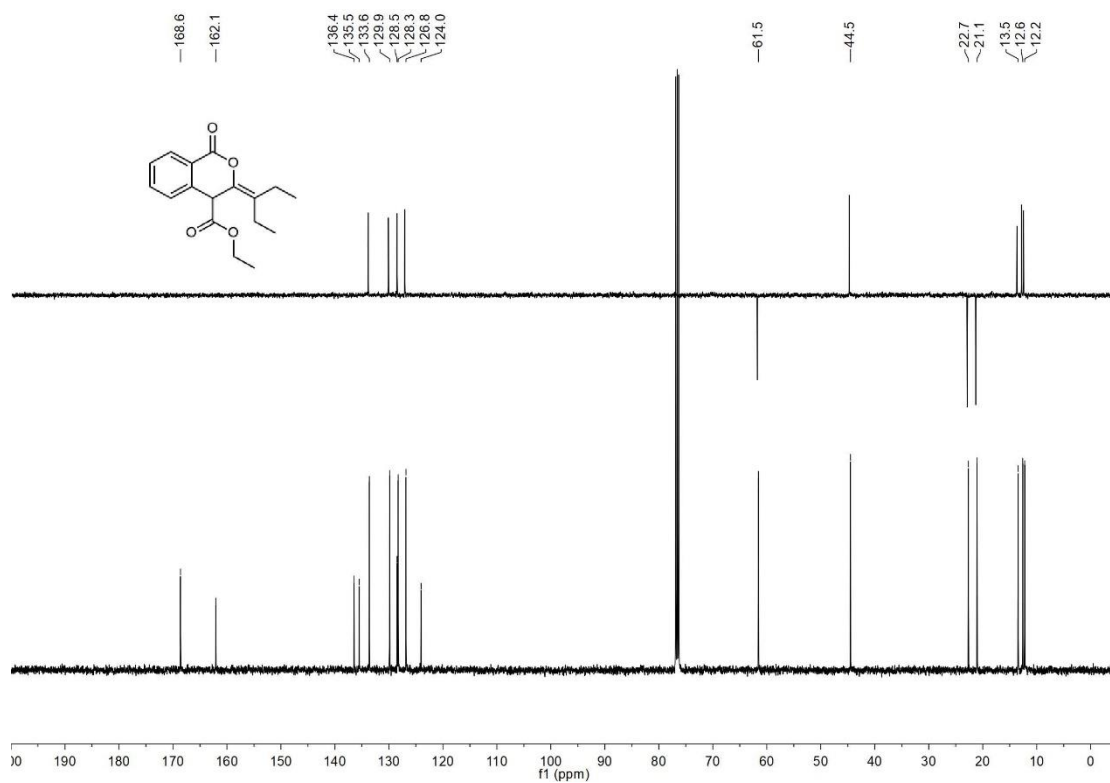

<sup>13</sup>C NMR spectrum of compound 3ab

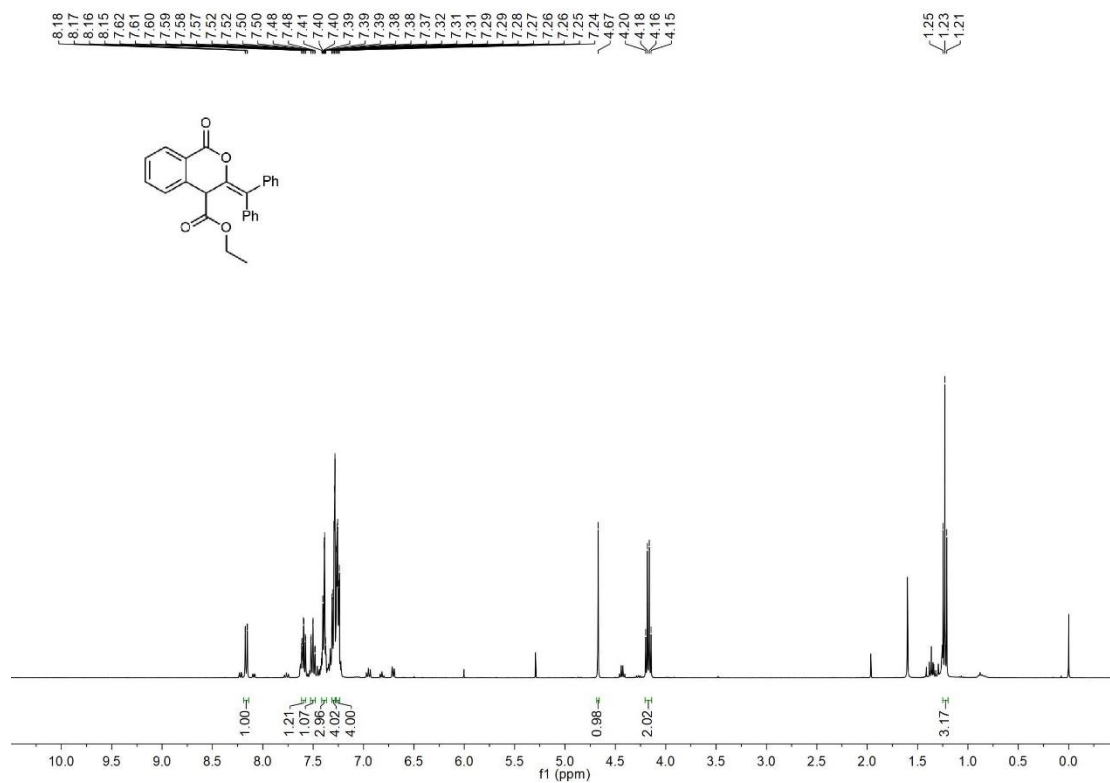

<sup>1</sup>H NMR spectrum of compound **3ac**

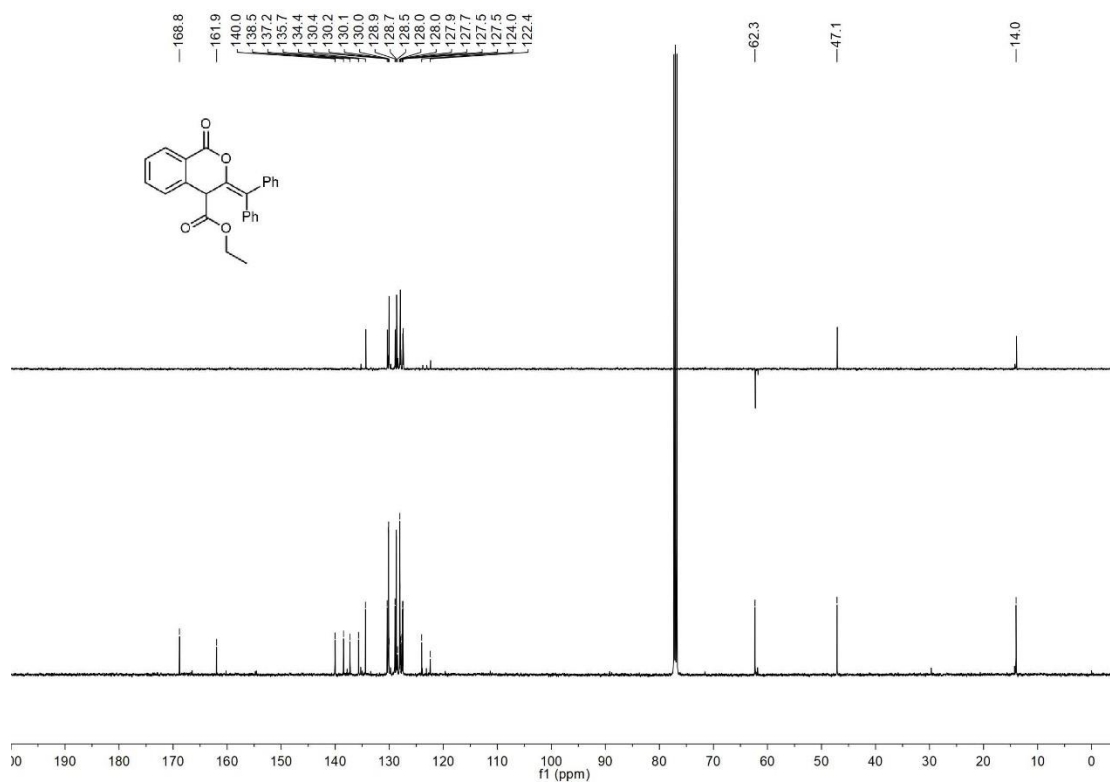

<sup>13</sup>C NMR spectrum of compound **3ac**

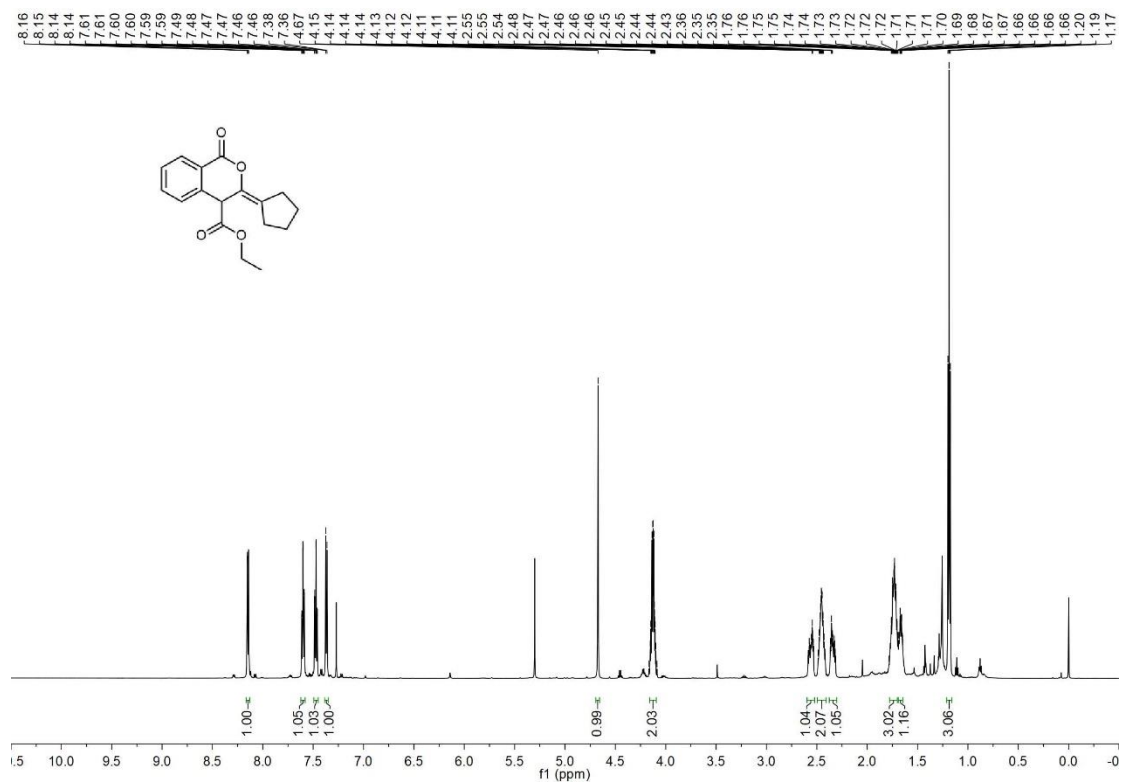

<sup>1</sup>H NMR spectrum of compound 3ad

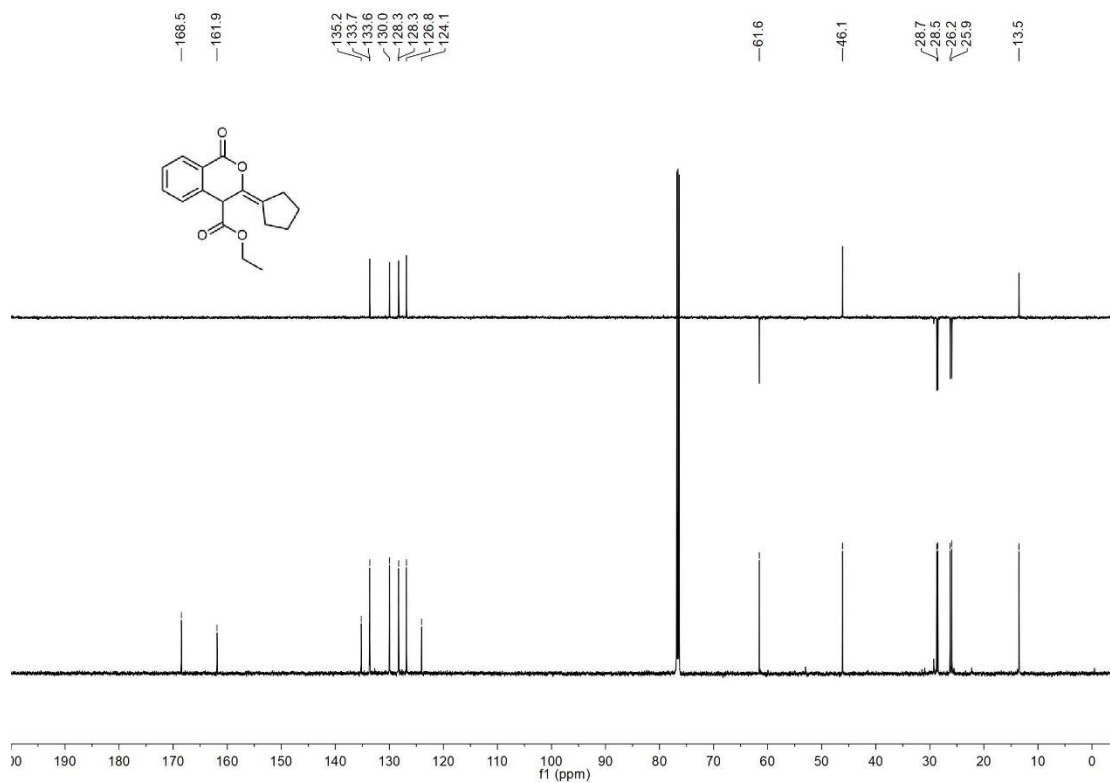

<sup>13</sup>C NMR spectrum of compound 3ad



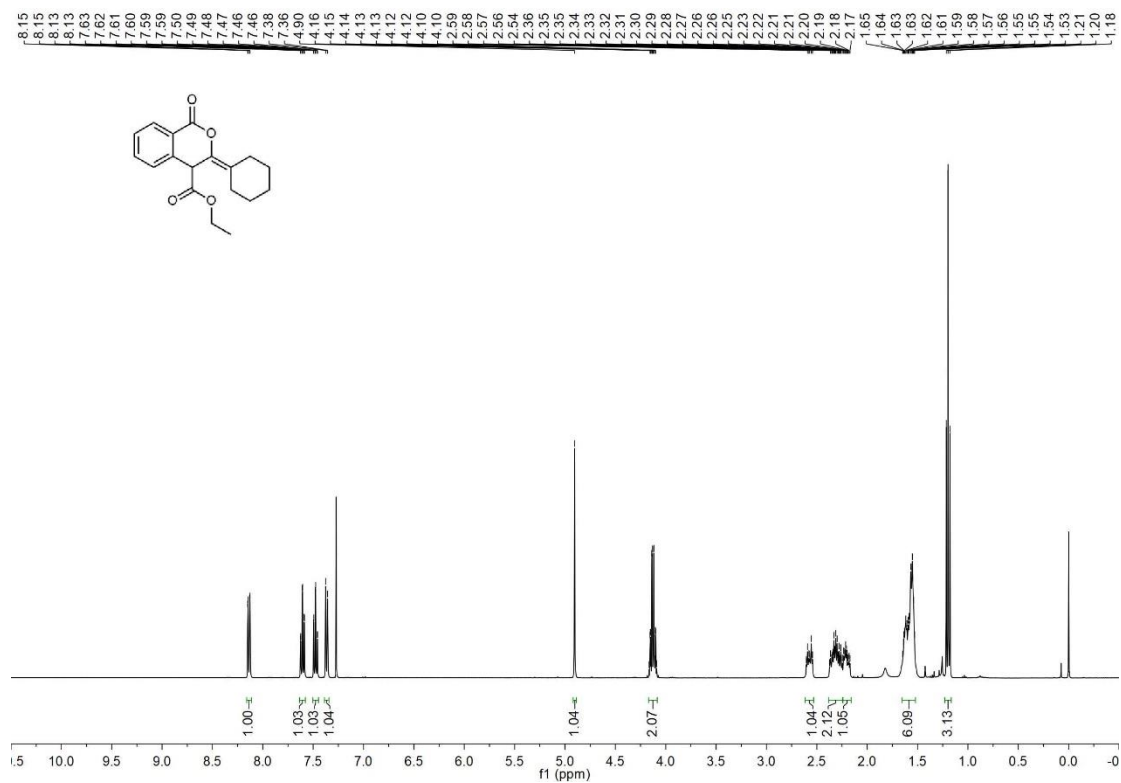

<sup>1</sup>H NMR spectrum of compound 3ae

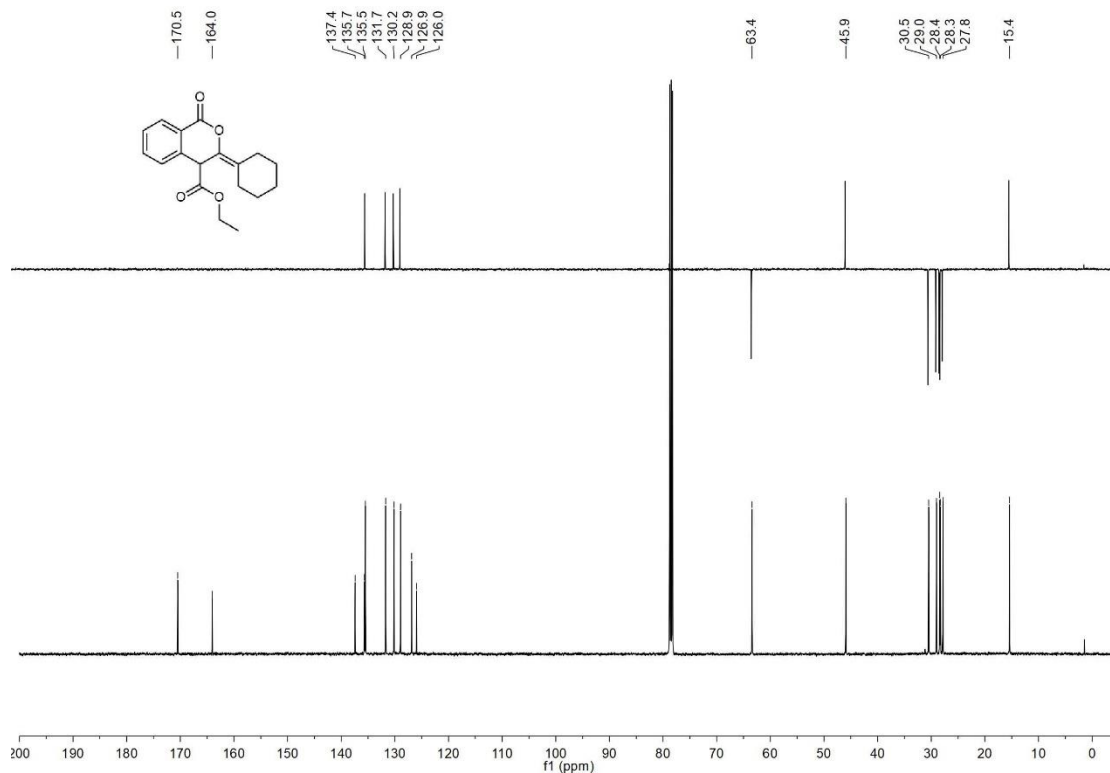

<sup>13</sup>C NMR spectrum of compound 3ae

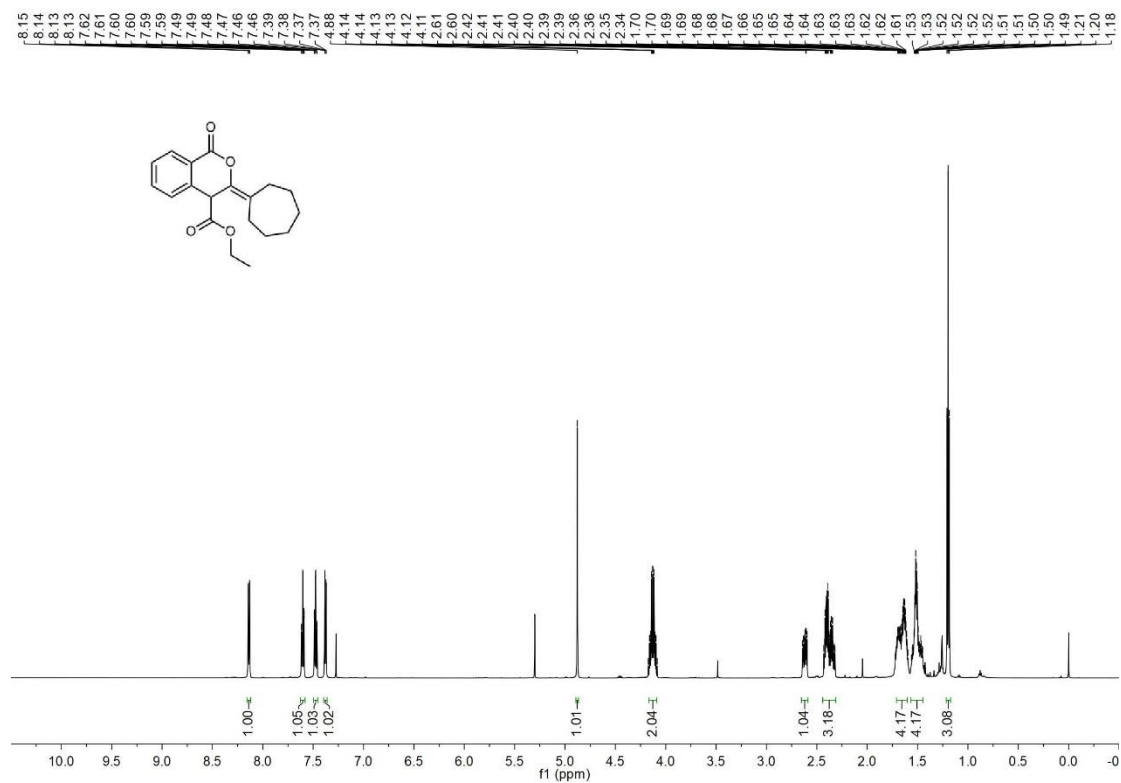

<sup>1</sup>H NMR spectrum of compound **3af**

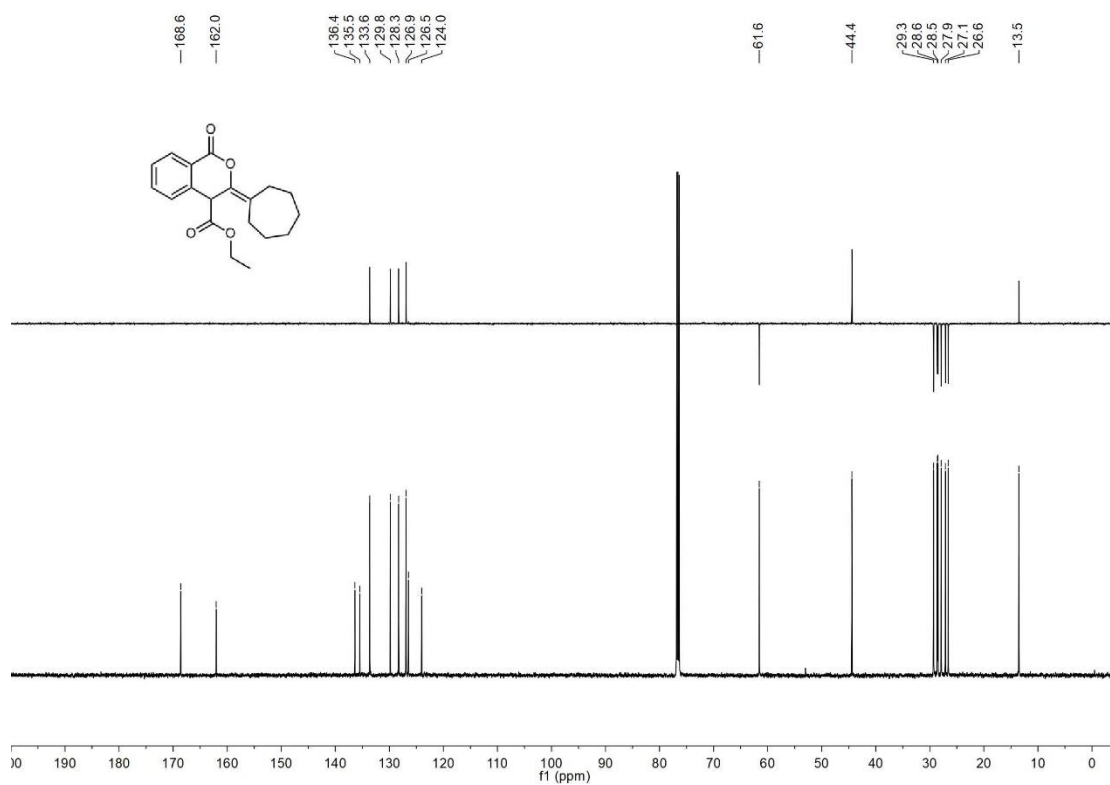

<sup>13</sup>C NMR spectrum of compound **3af**

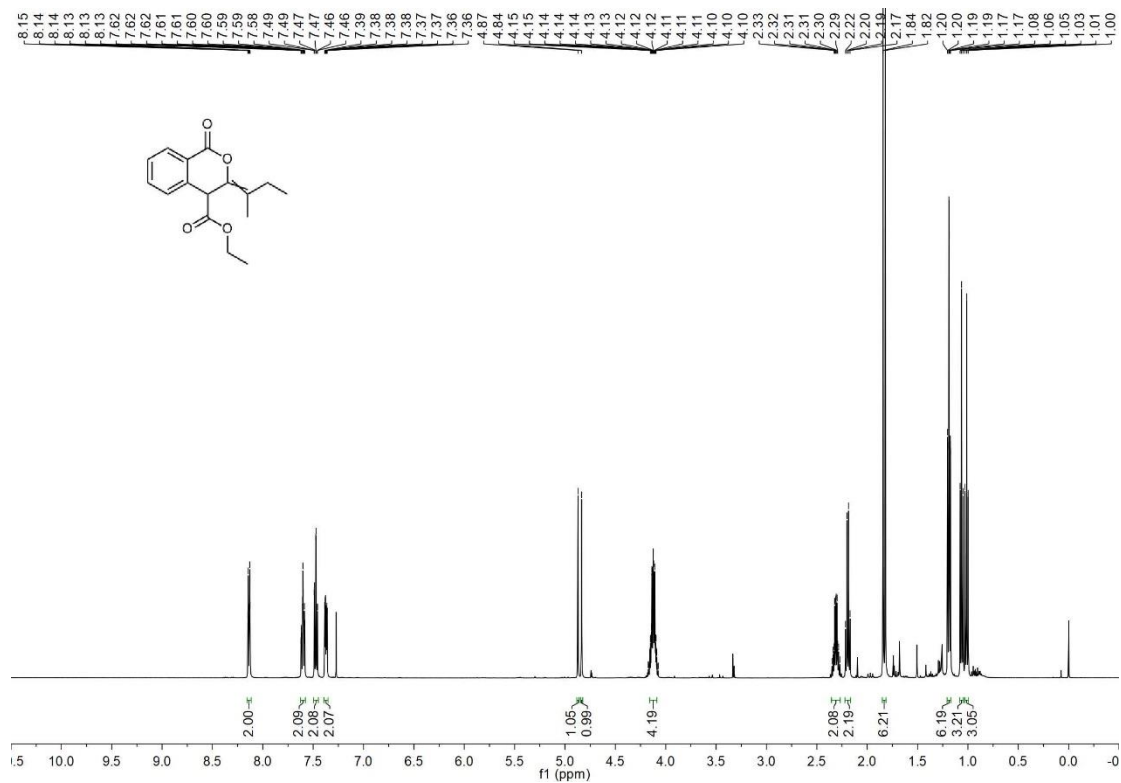

<sup>1</sup>H NMR spectrum of compound **3ag**

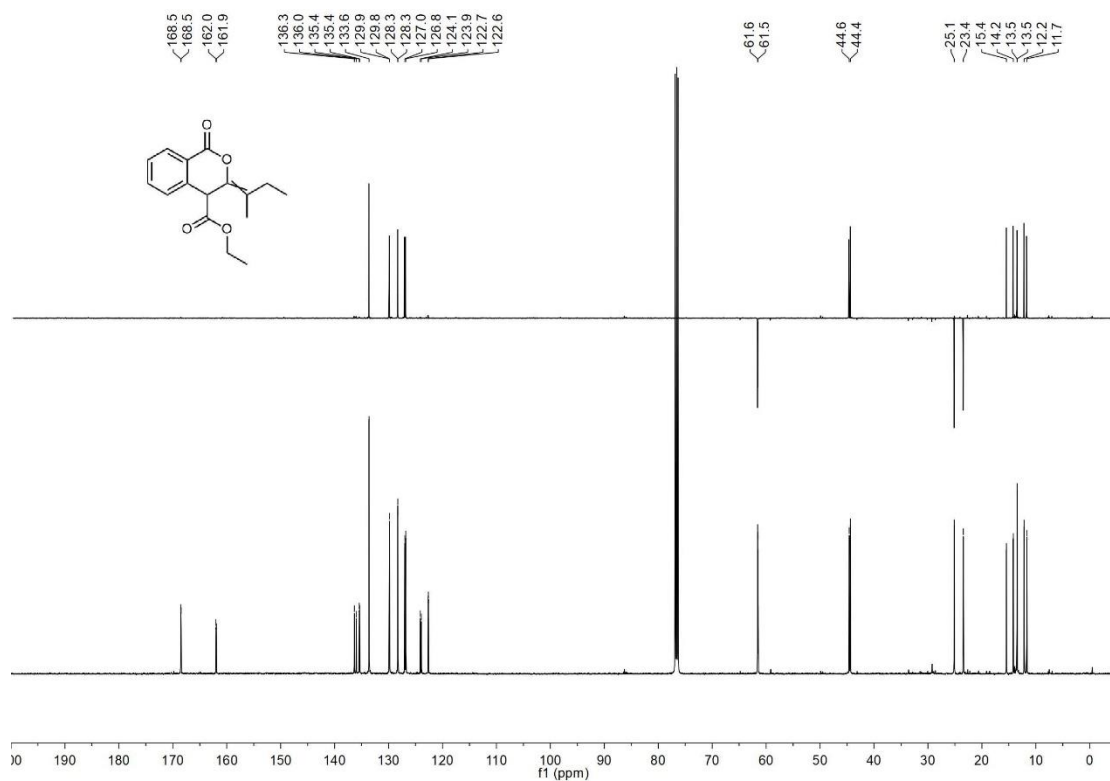

<sup>13</sup>C NMR spectrum of compound **3ag**

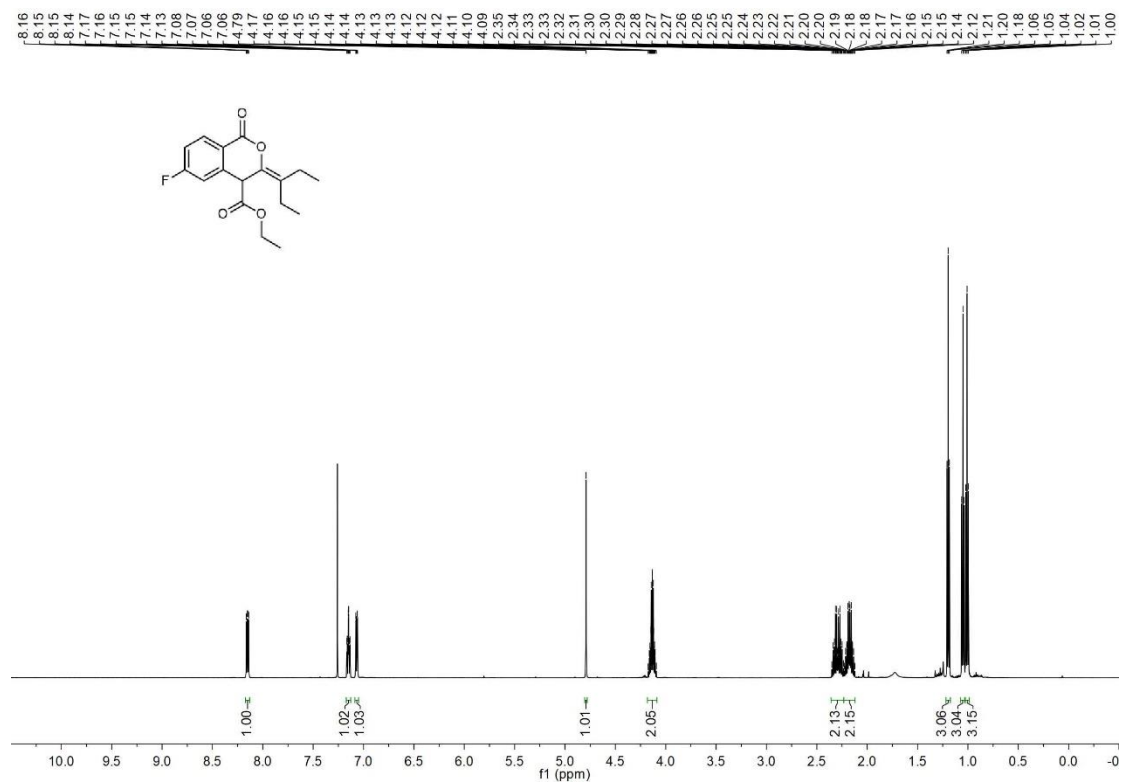

<sup>1</sup>H NMR spectrum of compound **3bb**

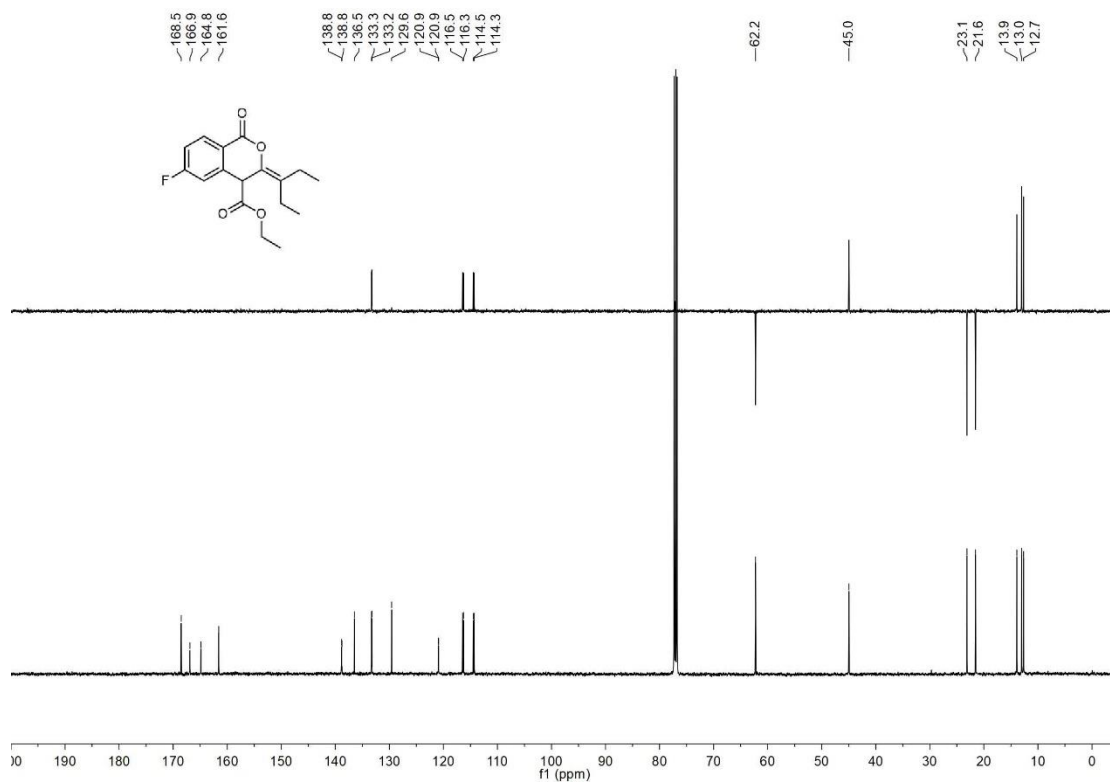

<sup>13</sup>C NMR spectrum of compound **3bb**

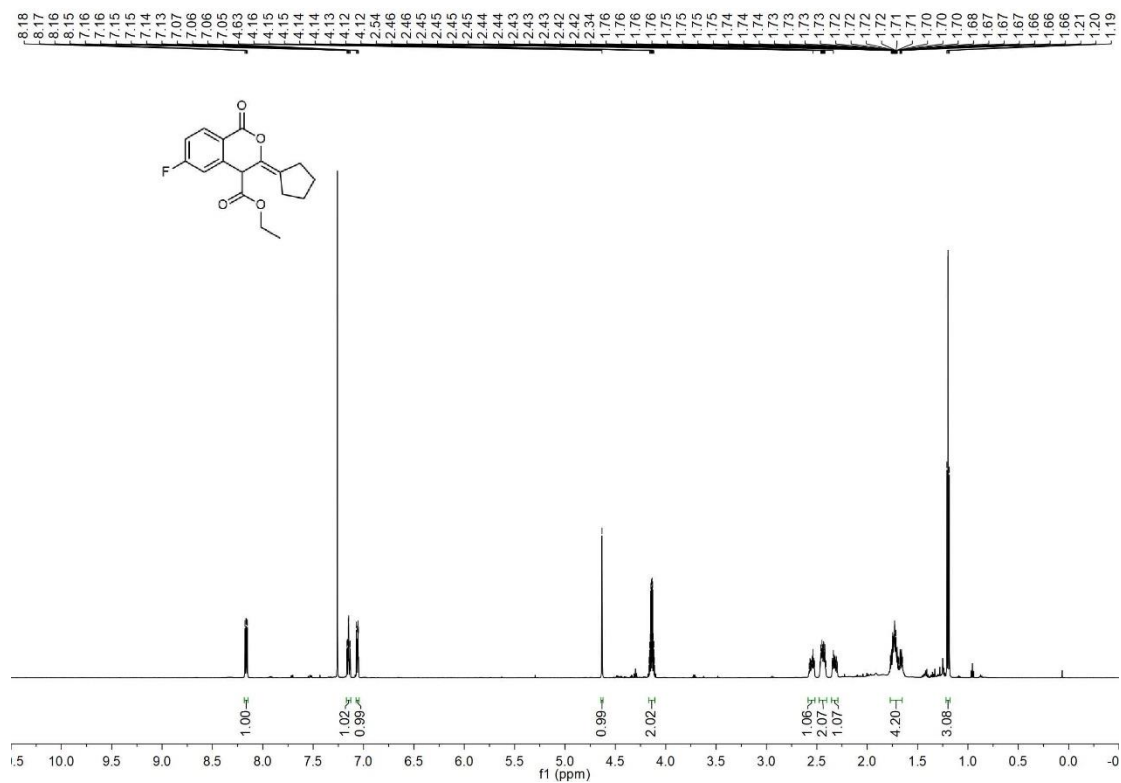

**<sup>1</sup>H NMR spectrum of compound 3bd**

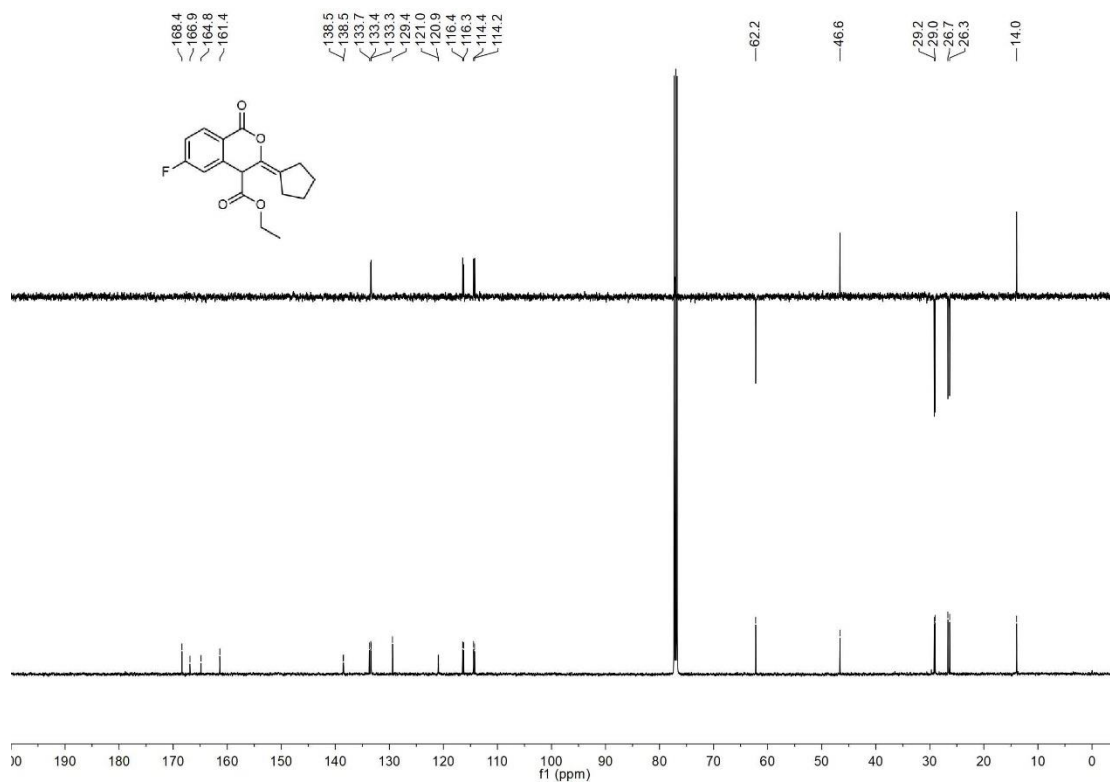

**<sup>13</sup>C NMR spectrum of compound 3bd**

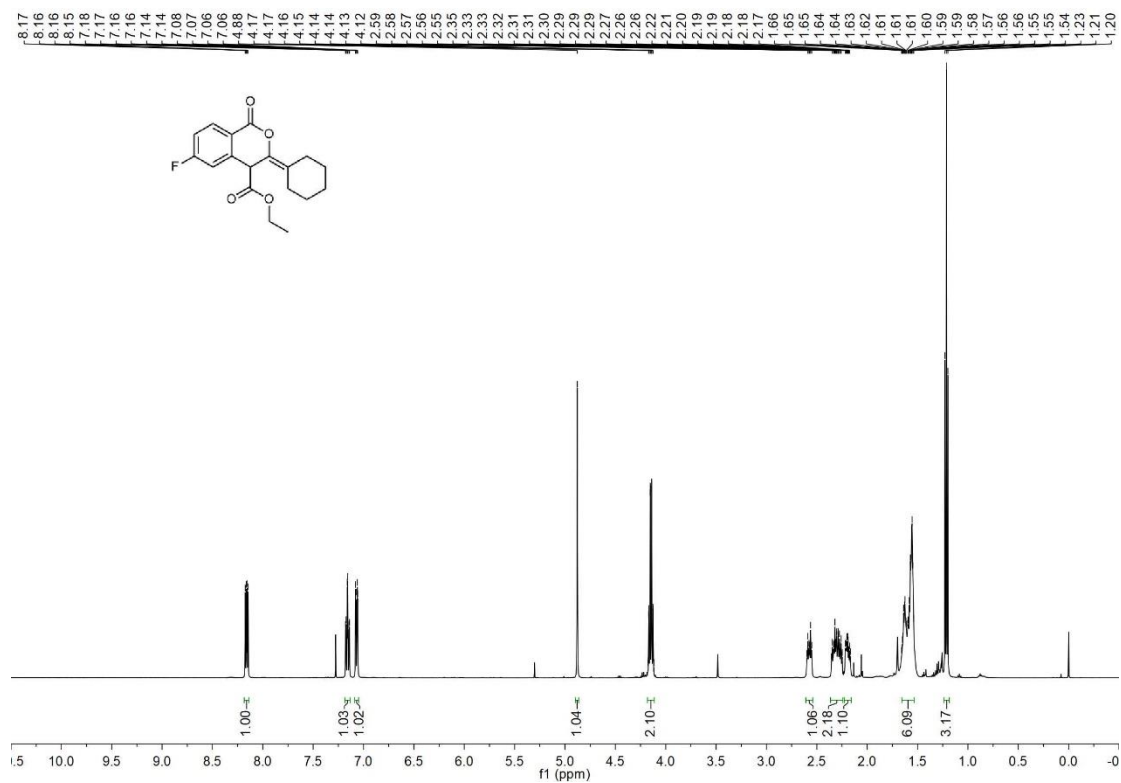

<sup>1</sup>H NMR spectrum of compound 3be

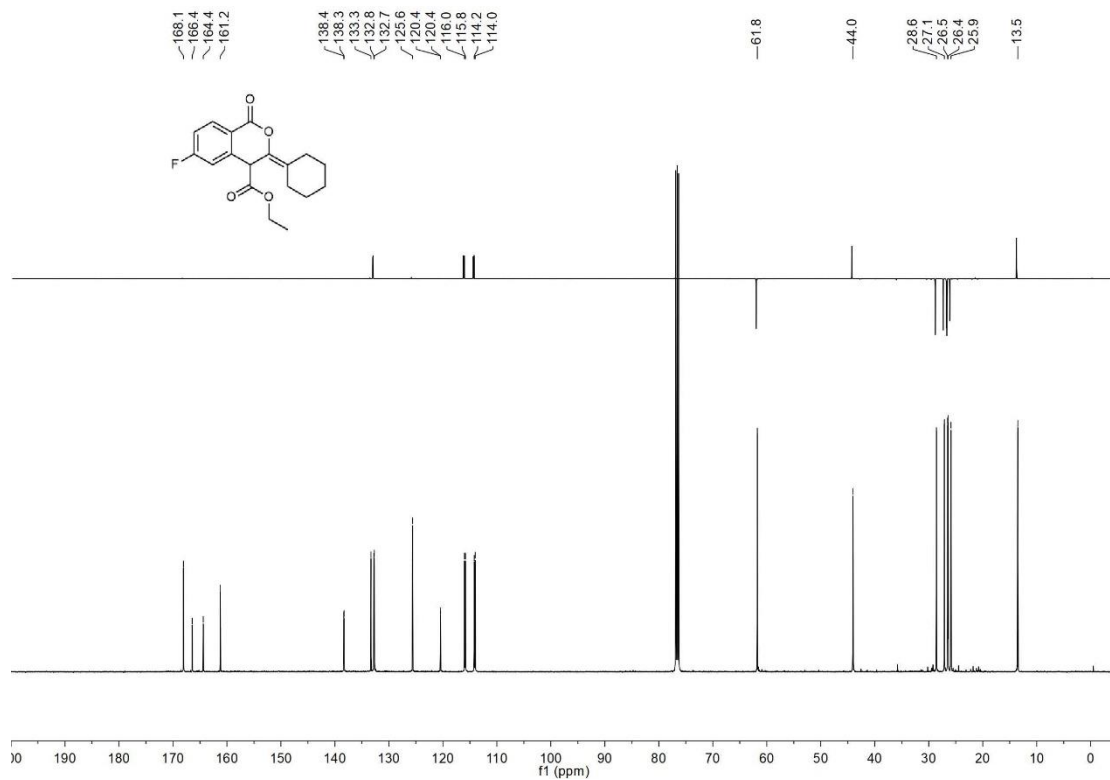

<sup>13</sup>C NMR spectrum of compound 3be

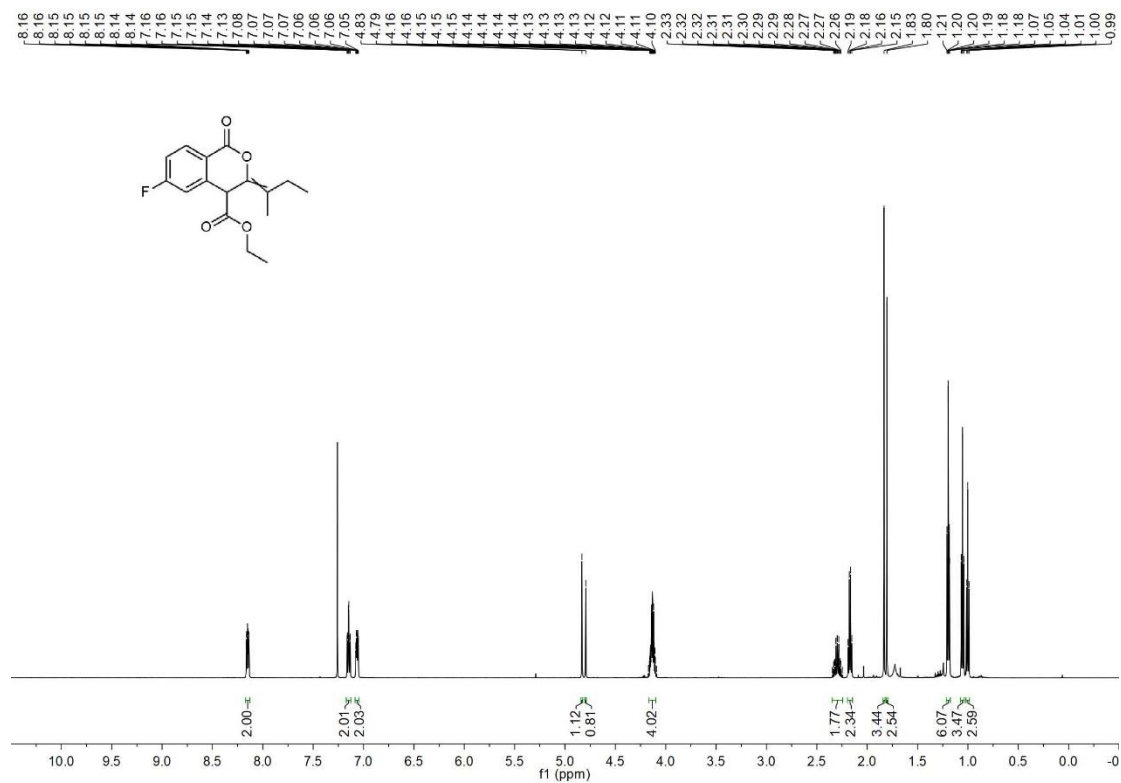

<sup>1</sup>H NMR spectrum of compound **3bg**

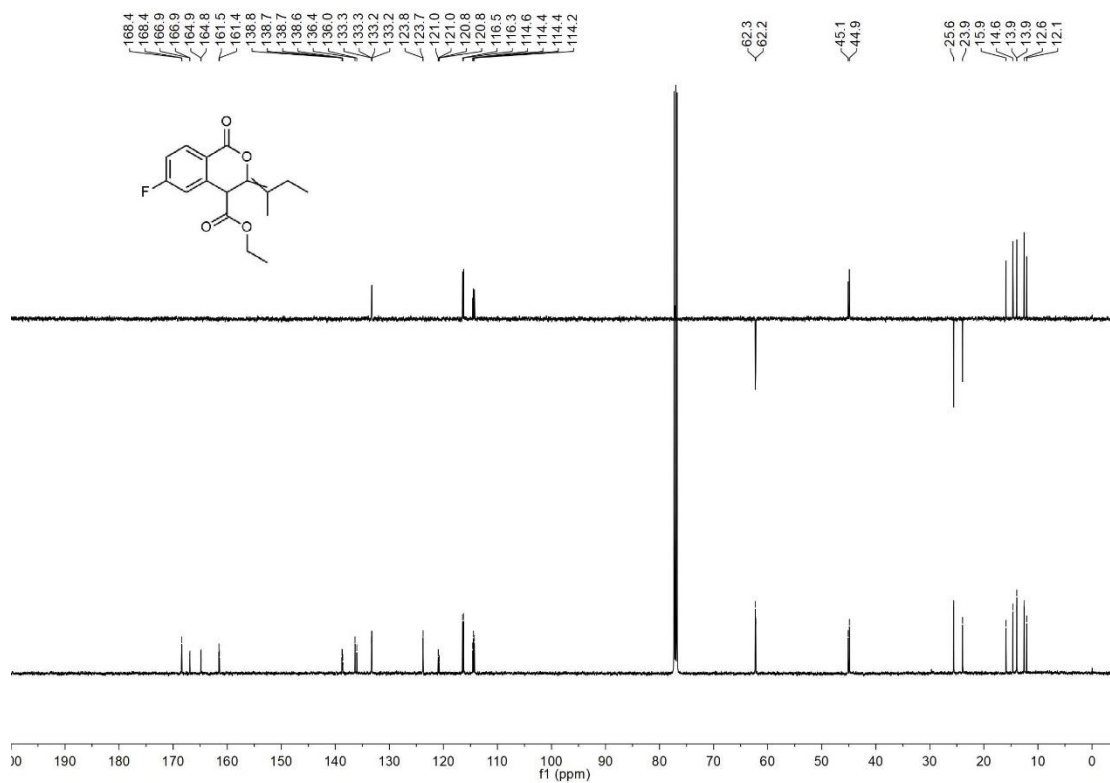

<sup>13</sup>C NMR spectrum of compound **3bg**





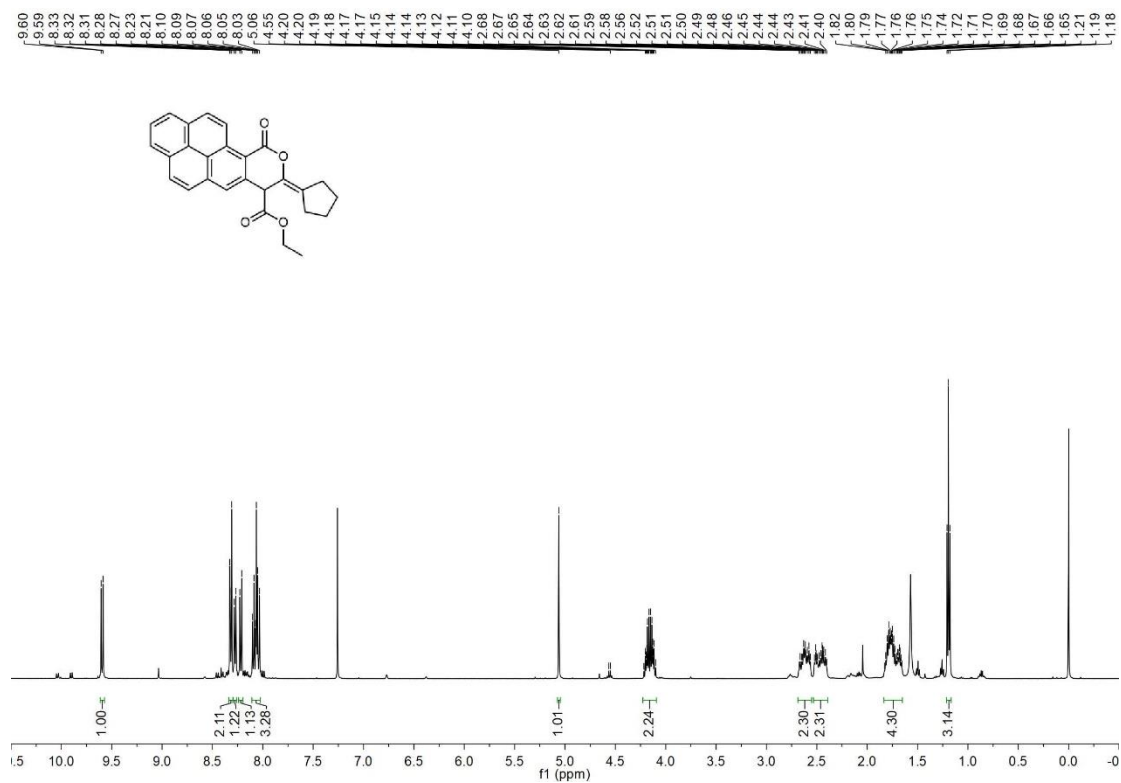

<sup>1</sup>H NMR spectrum of compound 3qd

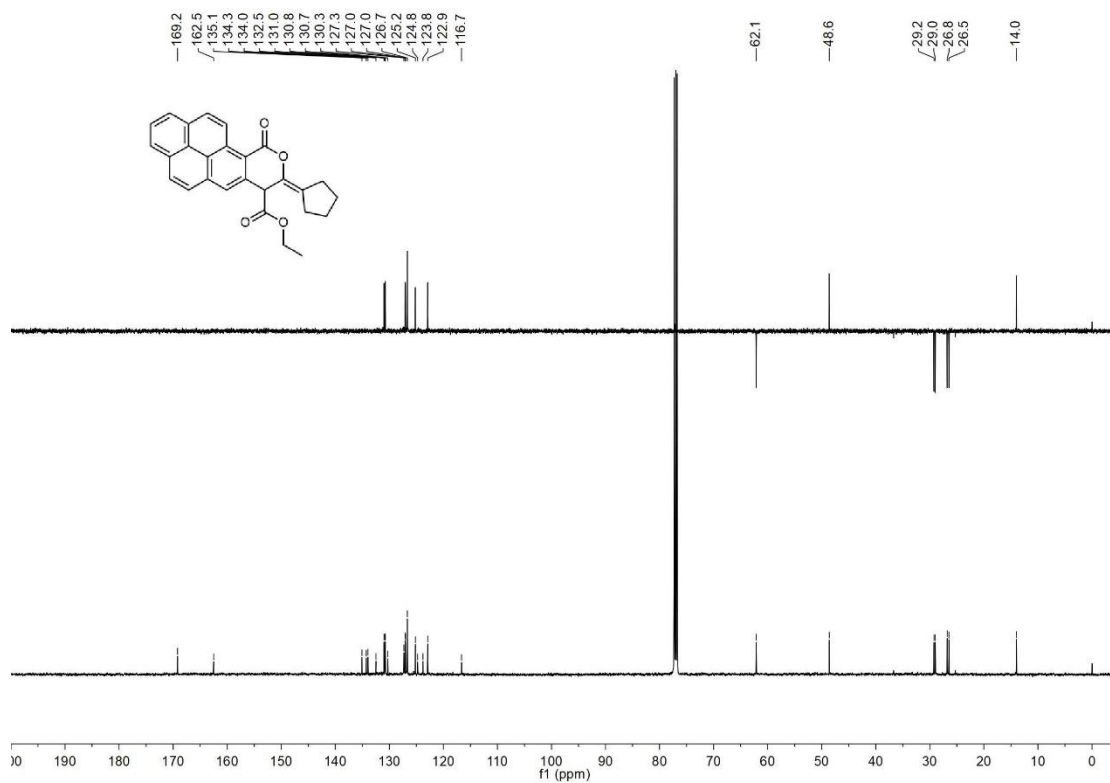

<sup>13</sup>C NMR spectrum of compound 3qd

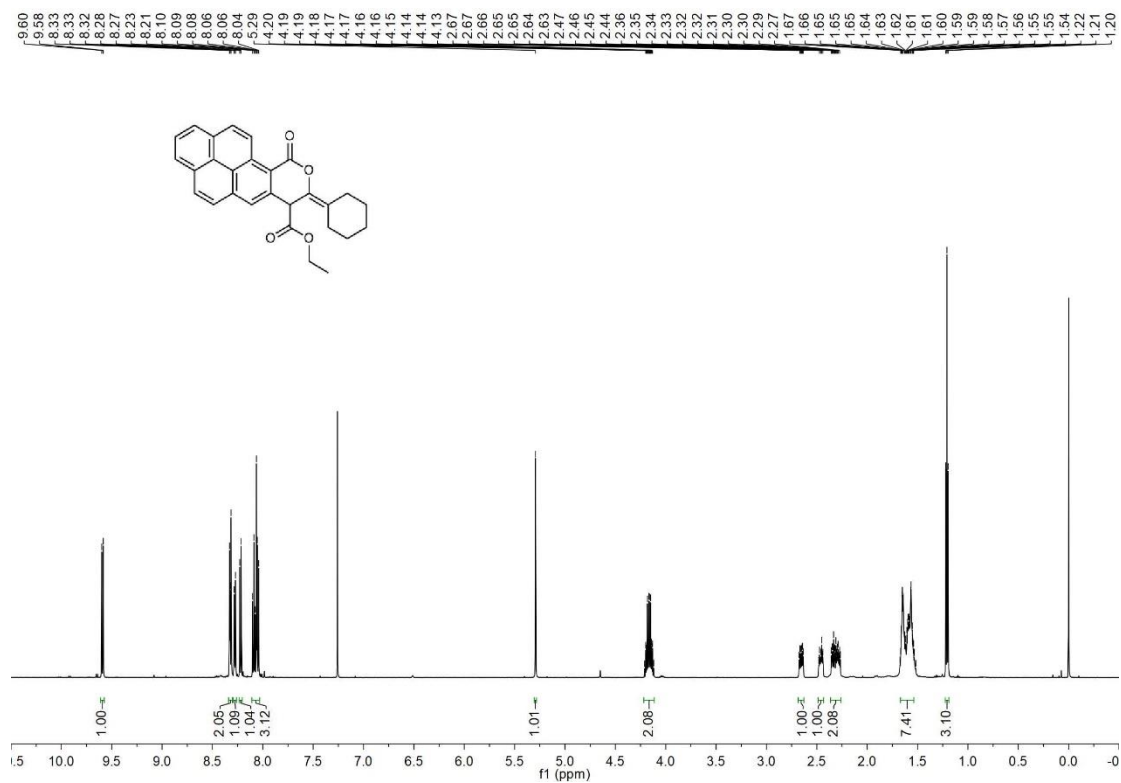

<sup>1</sup>H NMR spectrum of compound 3qe

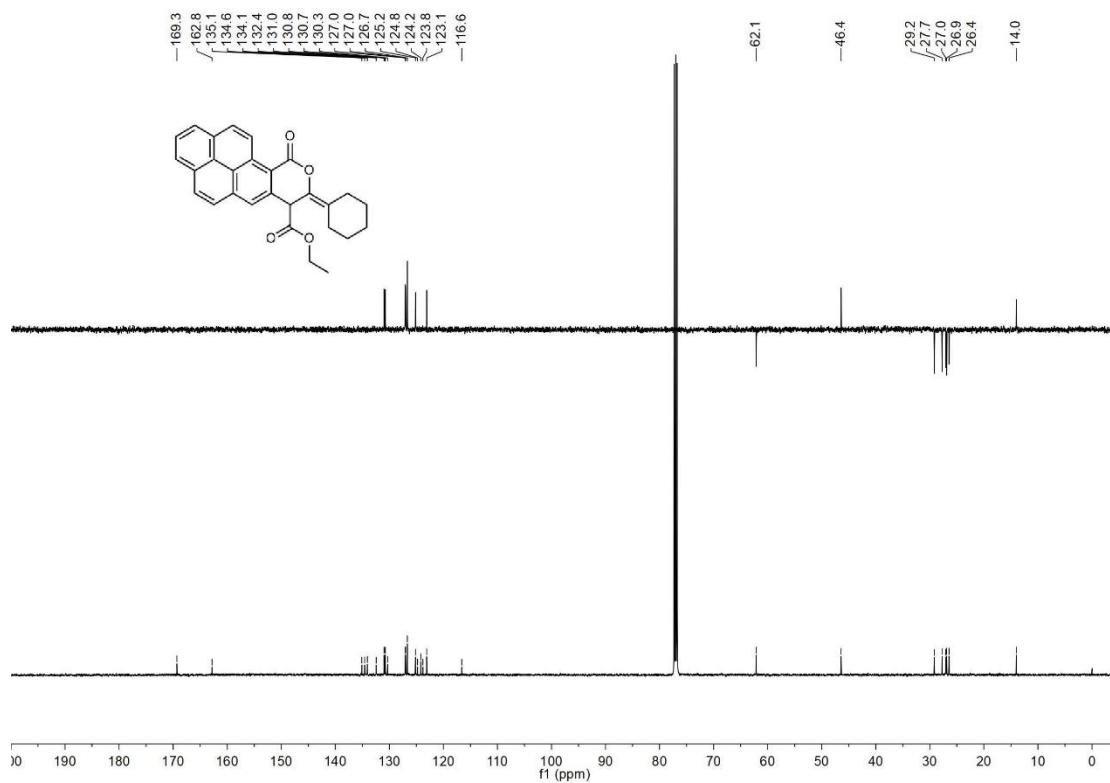

<sup>13</sup>C NMR spectrum of compound 3qe

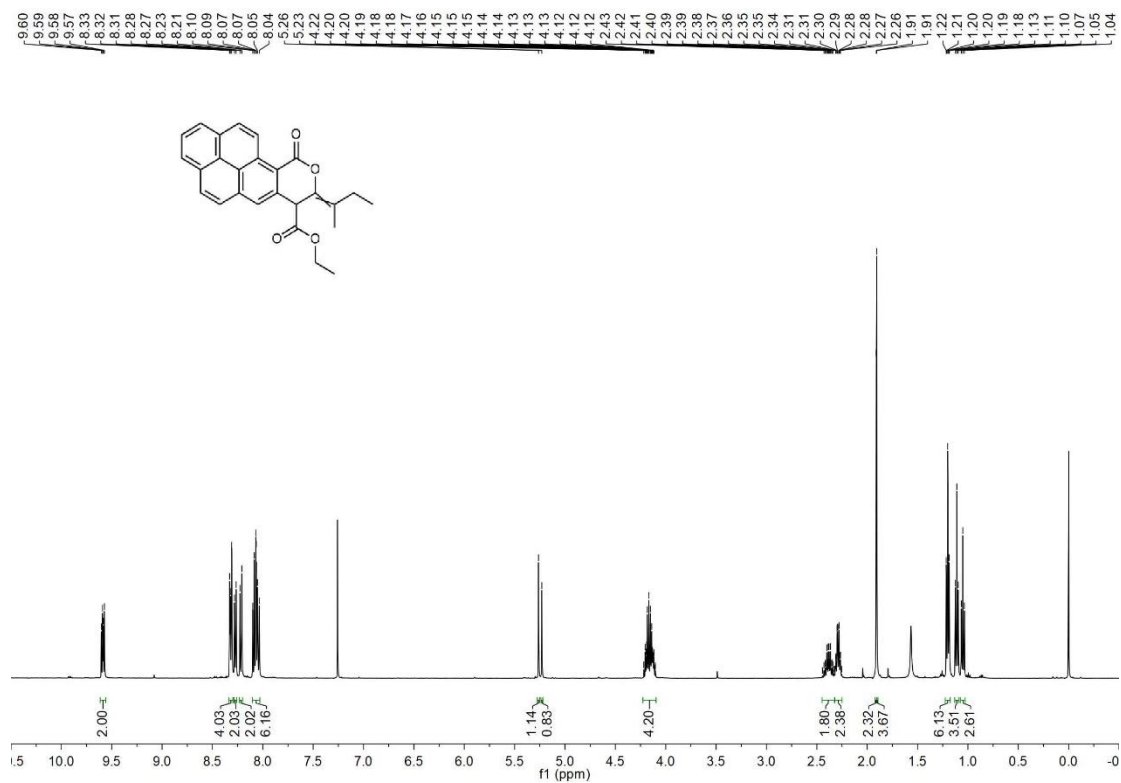

<sup>1</sup>H NMR spectrum of compound 3qg

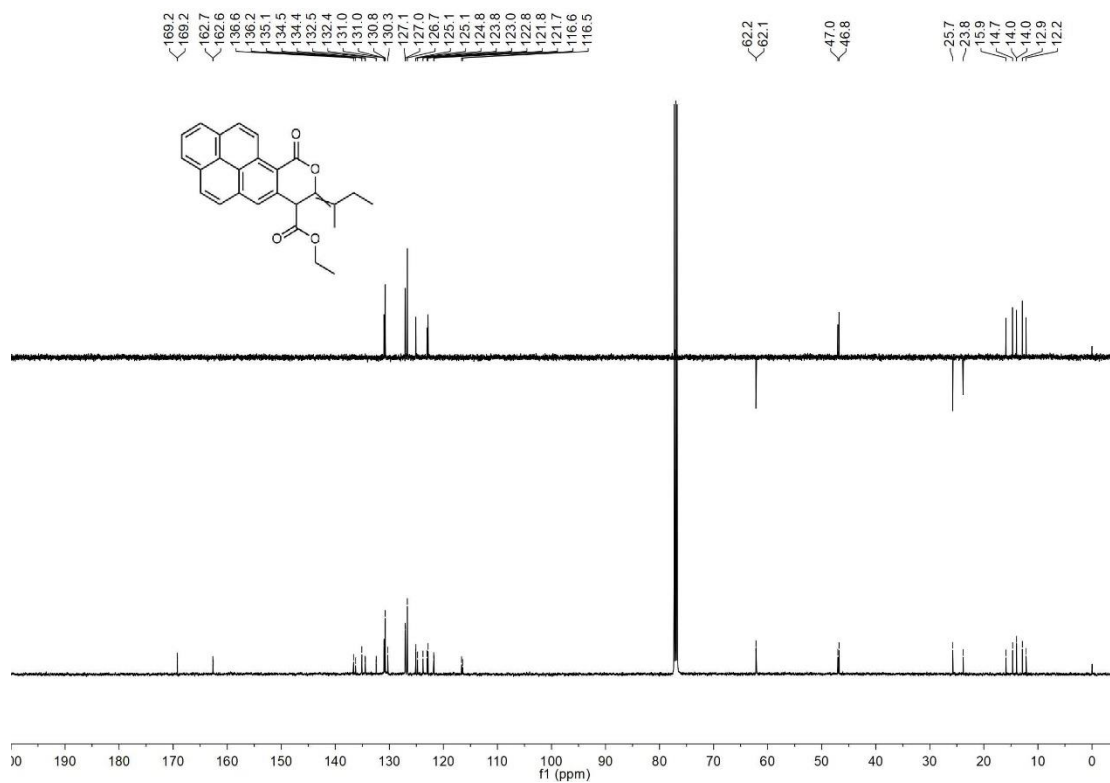

<sup>13</sup>C NMR spectrum of compound 3qg

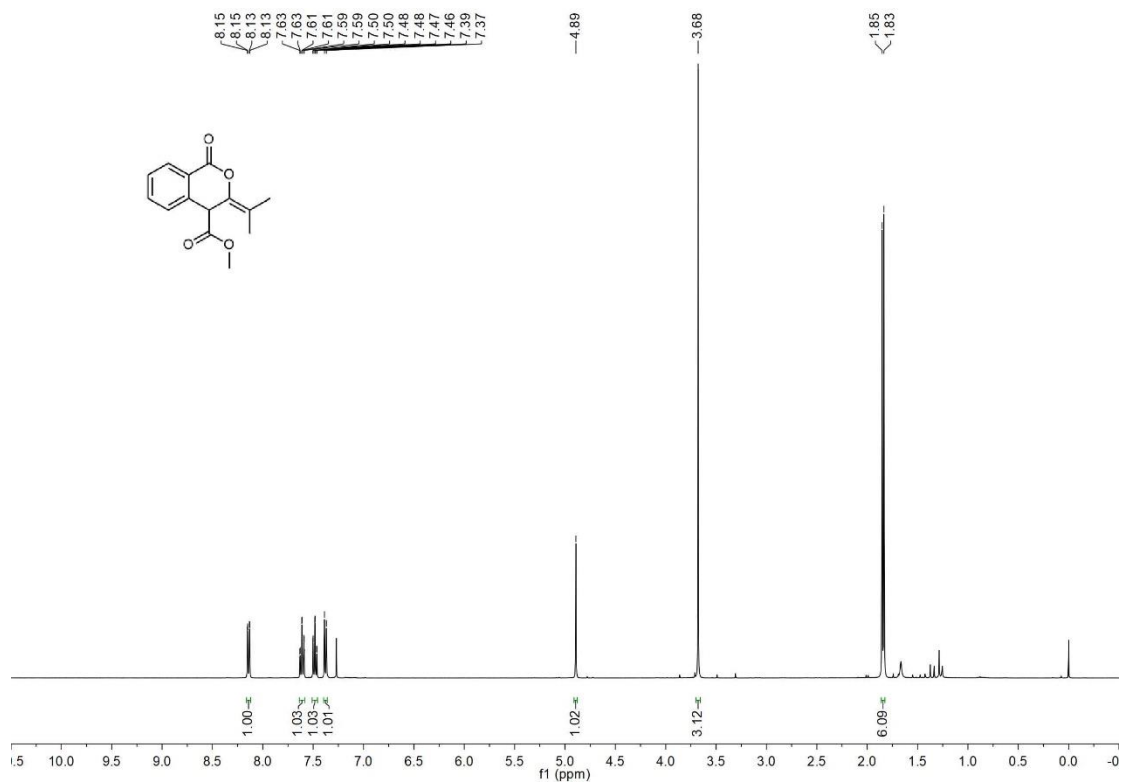

<sup>1</sup>H NMR spectrum of compound 3ah

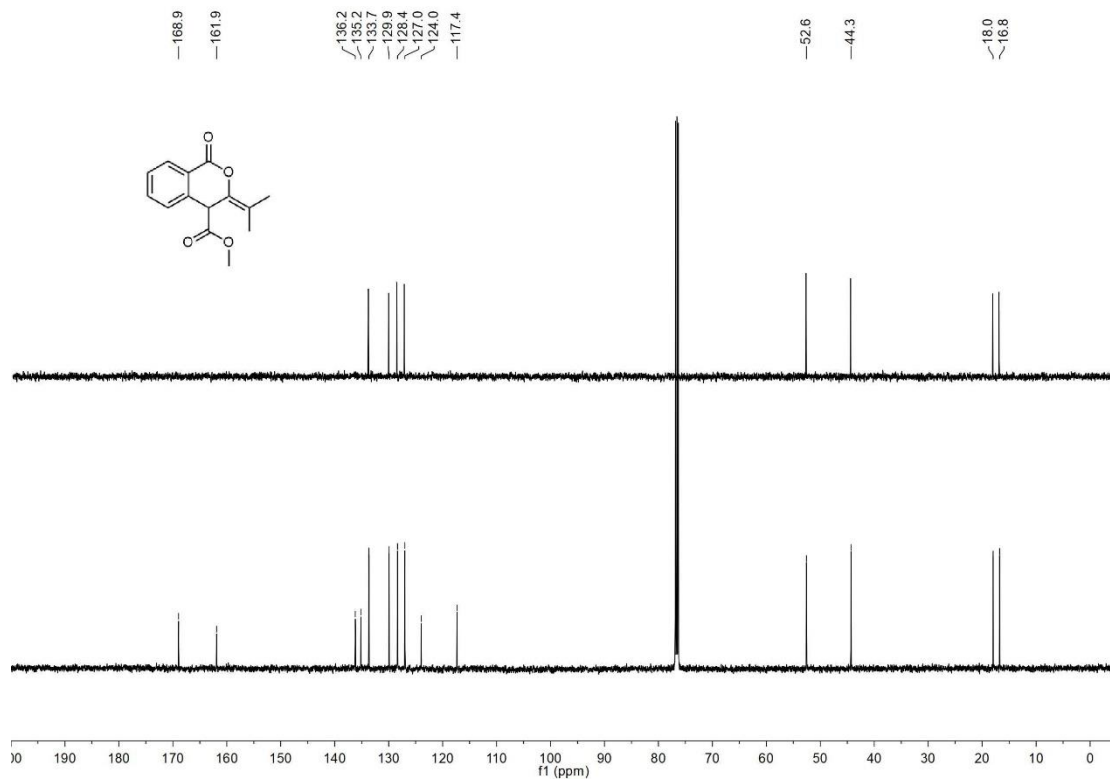

<sup>13</sup>C NMR spectrum of compound 3ah

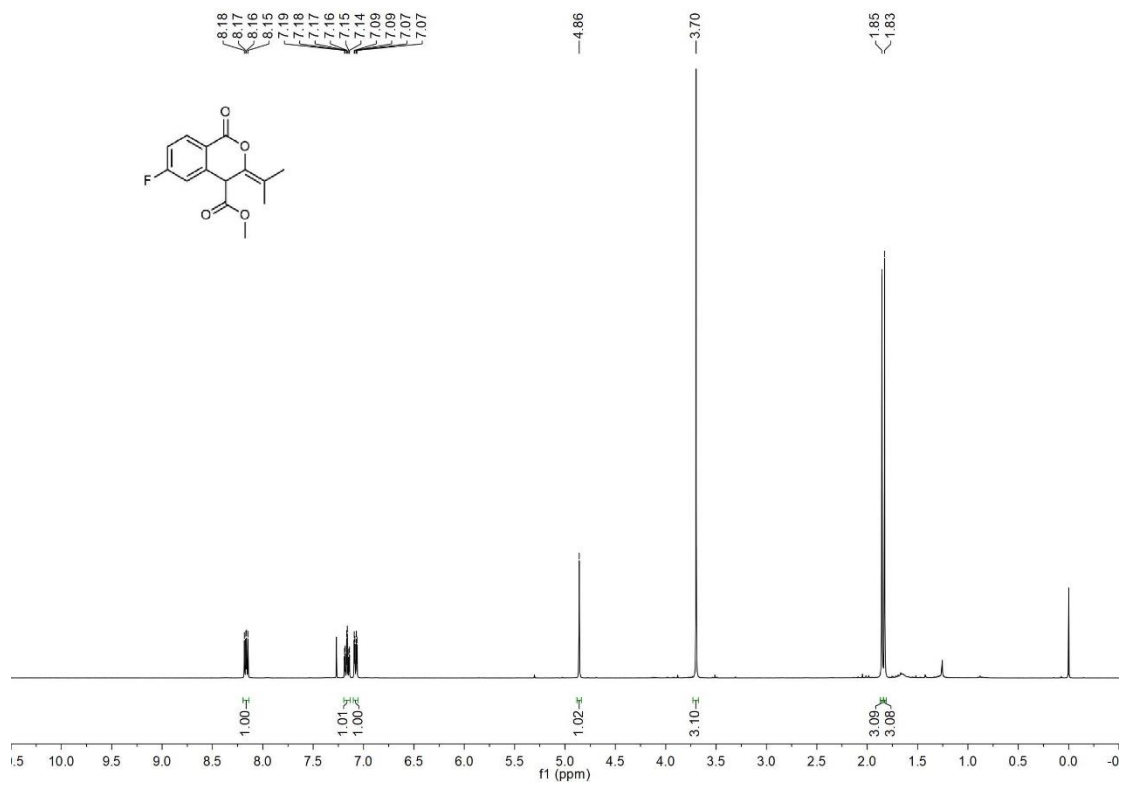

<sup>1</sup>H NMR spectrum of compound 3bh

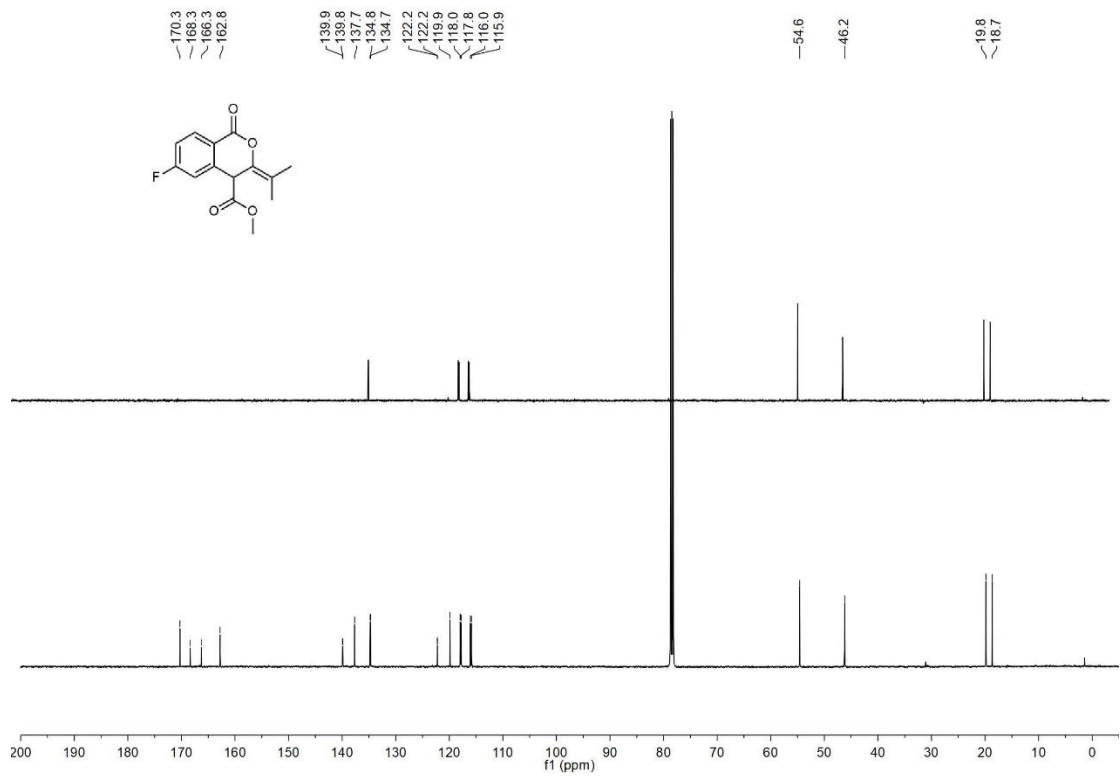

<sup>13</sup>C NMR spectrum of compound 3bh

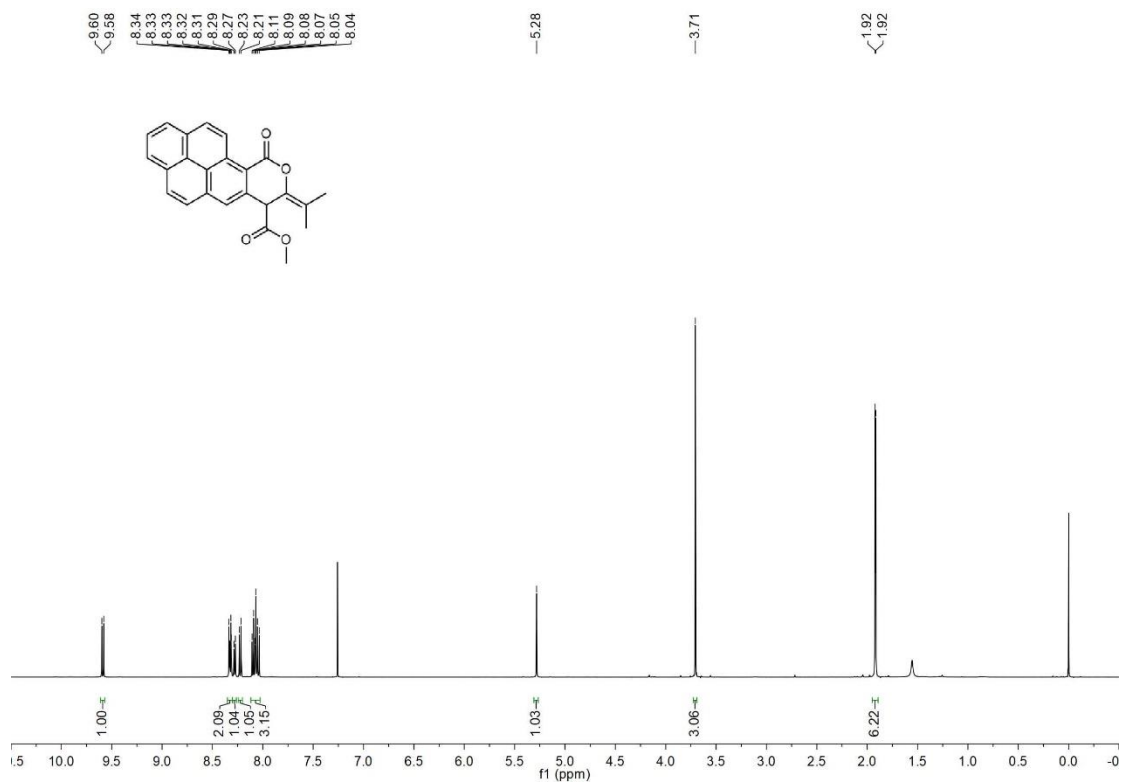

<sup>1</sup>H NMR spectrum of compound **3qh**

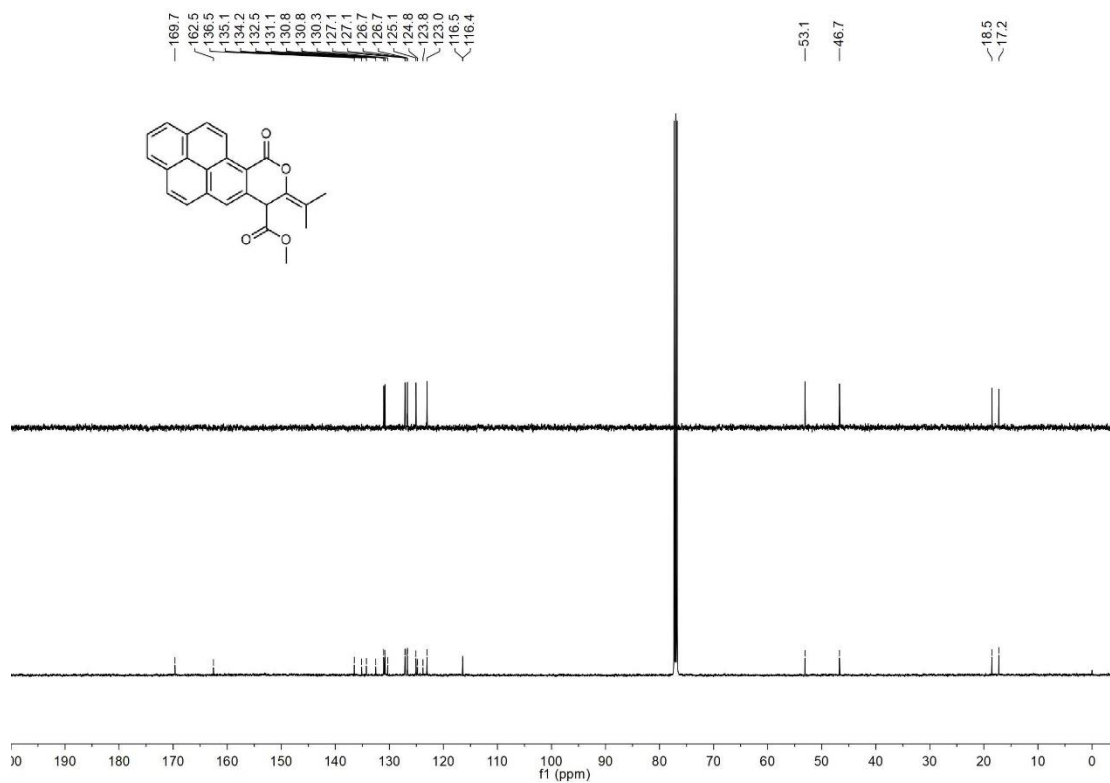

<sup>13</sup>C NMR spectrum of compound **3qh**

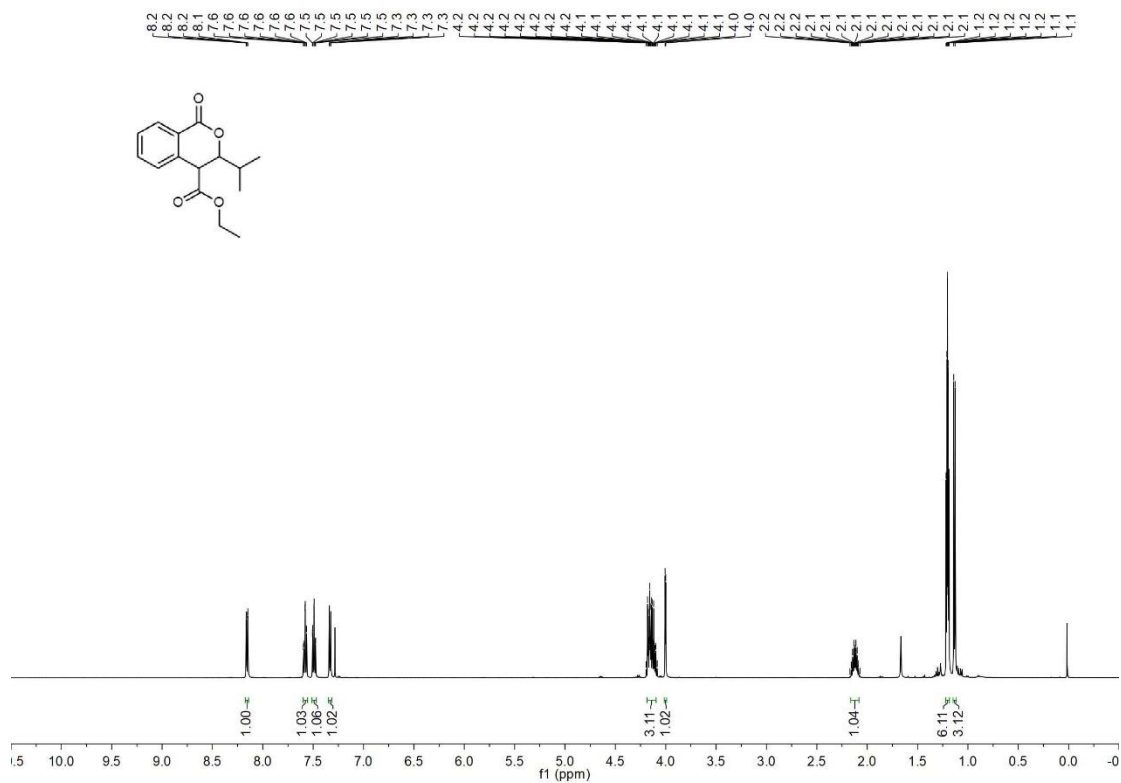

<sup>1</sup>H NMR spectrum of compound 4

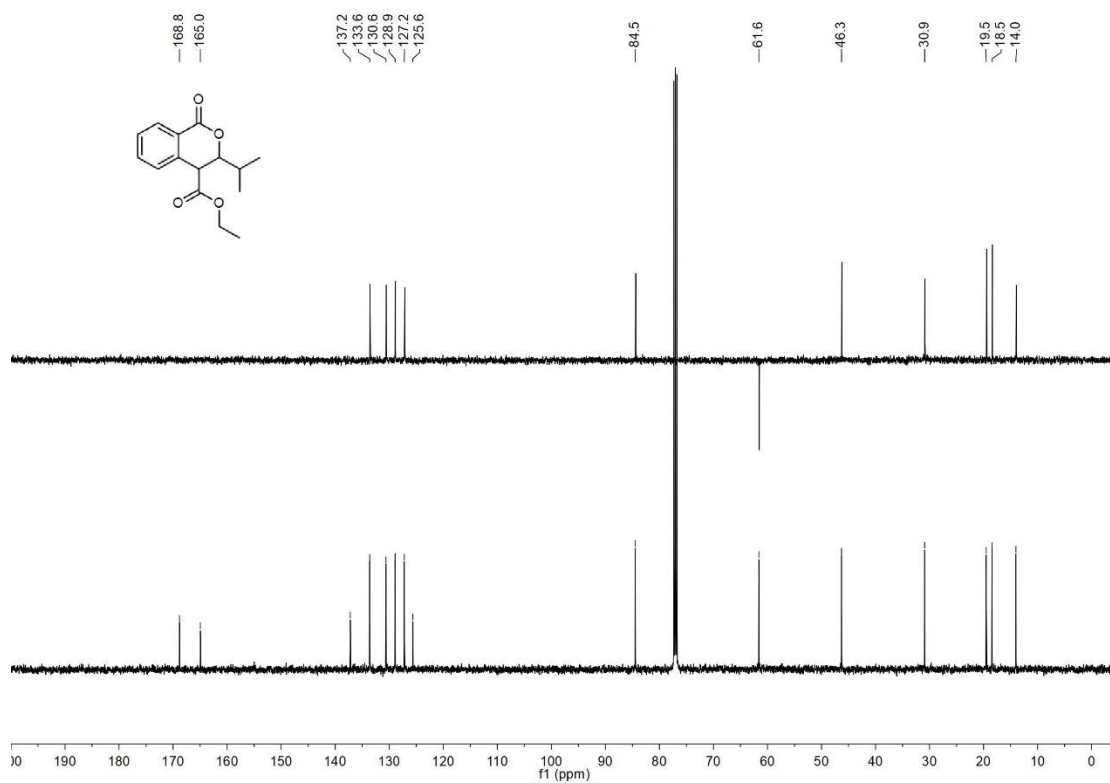

<sup>13</sup>C NMR spectrum of compound 4

## 8. X-ray single crystal diffraction data of compound 3da

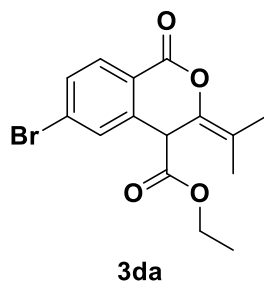

**Sample preparation:** Compound **3da** was dissolved in ethyl ether and the mixture was sonicated until the solid was completely dissolved. The solution was transferred into a clean 2 mL vial and sealed with a thin layer of parafilm on the top of one hole was made with a capillary (0.3 mm) to allow the solvent slowly violated at room temperature to afford the single crystal **3da**.

**Single crystal structure of 3da:** X-ray crystal structure of **3da** was determined at 150K with the ellipsoid contour at 50% probability level

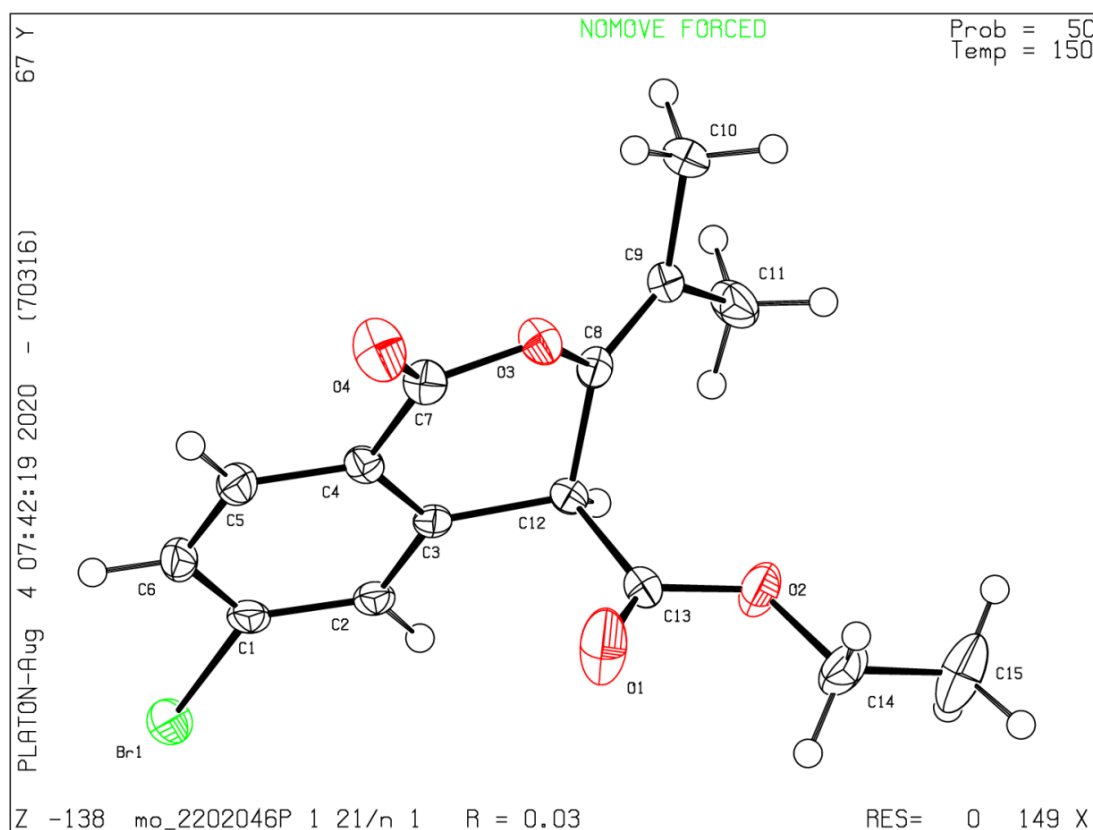

### Crystal data and structure refinement for mo\_22020468\_0m.

Identification code mo\_22020468\_0m



|                                             |                                                               |
|---------------------------------------------|---------------------------------------------------------------|
| Empirical formula                           | C <sub>15</sub> H <sub>15</sub> BrO <sub>4</sub>              |
| Formula weight                              | 339.18                                                        |
| Temperature/K                               | 150.0                                                         |
| Crystal system                              | monoclinic                                                    |
| Space group                                 | P2 <sub>1</sub> /n                                            |
| a/Å                                         | 6.8766 (2)                                                    |
| b/Å                                         | 14.3950 (5)                                                   |
| c/Å                                         | 14.8086 (5)                                                   |
| α/°                                         | 90                                                            |
| β/°                                         | 94.0020 (10)                                                  |
| γ/°                                         | 90                                                            |
| Volume/Å <sup>3</sup>                       | 1462.31 (8)                                                   |
| Z                                           | 4                                                             |
| ρ <sub>calc</sub> /cm <sup>3</sup>          | 1.541                                                         |
| μ/mm <sup>-1</sup>                          | 2.821                                                         |
| F(000)                                      | 688.0                                                         |
| Crystal size/mm <sup>3</sup>                | 0.15 × 0.12 × 0.08                                            |
| Radiation                                   | MoKα (λ = 0.71073)                                            |
| 2θ range for data collection/°              | 3.95 to 52.764                                                |
| Index ranges                                | -7 ≤ h ≤ 8, -17 ≤ k ≤ 17, -18 ≤ l ≤ 18                        |
| Reflections collected                       | 16150                                                         |
| Independent reflections                     | 2984 [R <sub>int</sub> = 0.0477, R <sub>sigma</sub> = 0.0352] |
| Data/restraints/parameters                  | 2984/0/184                                                    |
| Goodness-of-fit on F <sup>2</sup>           | 1.032                                                         |
| Final R indexes [I ≥ 2σ (I)]                | R <sub>1</sub> = 0.0300, wR <sub>2</sub> = 0.0628             |
| Final R indexes [all data]                  | R <sub>1</sub> = 0.0428, wR <sub>2</sub> = 0.0696             |
| Largest diff. peak/hole / e Å <sup>-3</sup> | 0.34/-0.50                                                    |
